# Supplementary material for: Reaction discovery using acetylene gas as the chemical feedstock accelerated by the “stop-flow” micro-tubing reactor system
Source: Royal Society of Chemistry journal article supplement (doi:10.1039/c7sc00408g), 2017-01-01

# Reaction Discovery Using Acetylene Gas as the Chemical Feedstock Accelerated by the “Stop-Flow” Micro-Tubing Reactor System

Fei Xue,<sup>†</sup> Hongping Deng,<sup>†</sup> Chengwen Xue, Dara Khairunnisa Binte Mohamed, Karen Yuanting Tang, Jie Wu\*

Department of Chemistry, National University of Singapore, 3 Science Drive 3, Republic of Singapore, 117543

<sup>†</sup>These authors contributed equally to this work.

## Supporting Information

### Table of Contents

|                                                                                                 |       |
|-------------------------------------------------------------------------------------------------|-------|
| <b>1. General Experimental</b> .....                                                            | SI-3  |
| <b>2. “Stop-Flow” Micro-Tubing (SFMT) Reactor Platform</b> .....                                | SI-4  |
| 2.1 Graphical supporting information for the SFMT platform.....                                 | SI-4  |
| 2.2 Graphical supporting information for individual components.....                             | SI-4  |
| <b>3. Mechanism Proposal</b> .....                                                              | SI-6  |
| 3.1 Proposed mechanism for fulvene synthesis using acetylene.....                               | SI-6  |
| 3.2 Mechanism study for photo-promoted styrene derivative synthesis.....                        | SI-6  |
| <b>4. Graphical Supporting Information for Reaction Screening Using the SFMT Platform</b> ..... | SI-10 |
| <b>5. Feasibility Test for SFMT Reactors with Reported Transformations</b> .....                | SI-14 |
| 5.1 Pressure test in the SFMT reactor.....                                                      | SI-14 |
| 5.2 Summary of comparison experimental results.....                                             | SI-15 |

|                                                                                         |              |
|-----------------------------------------------------------------------------------------|--------------|
| 5.3 General procedure for batch, continuous-flow, SFMT reactions .....                  | SI-17        |
| <b>6. Sonogashira Coupling with Acetylene .....</b>                                     | <b>SI-26</b> |
| 6.1 Reaction optimization.....                                                          | SI-26        |
| 6.2 General procedure for batch, SFMT, and continuous-flow reactions.....               | SI-27        |
| 6.3 Large-scale continuous production.....                                              | SI-28        |
| 6.4 One-pot Sonogashira coupling of bromoanisole with acetylene.....                    | SI-29        |
| 6.5 New compound characterization.....                                                  | SI-30        |
| <b>7. Fulvene Synthesis .....</b>                                                       | <b>SI-36</b> |
| 7.1 Reaction optimization.....                                                          | SI-36        |
| 7.2 General procedure for batch, SFMT, and continuous-flow reactions.....               | SI-37        |
| 7.3 Large-scale continuous production.....                                              | SI-39        |
| 7.4 New compound characterization.....                                                  | SI-40        |
| <b>8. Visible-Light Promoted Synthesis of Styrene Derivatives Using Acetylene .....</b> | <b>SI-43</b> |
| 8.1 SFMT Reactor Setup.....                                                             | SI-43        |
| 8.2 Reaction optimization.....                                                          | SI-43        |
| 8.3 General procedure for batch, and SFMT, reactions.....                               | SI-44        |
| 8.4 New compound characterization.....                                                  | SI-45        |
| <b>9. Trouble Shooting : Frequently Asked Questions .....</b>                           | <b>SI-49</b> |
| 9.1 The SFMT reactor platform.....                                                      | SI-49        |
| 9.2 Sonogashira coupling.....                                                           | SI-52        |
| 9.3 Fulvene synthesis.....                                                              | SI-53        |
| 9.4 Fluorinated styrene derivate synthesis.....                                         | SI-54        |

|                                       |       |
|---------------------------------------|-------|
| <b>10. References and Notes</b> ..... | SI-54 |
|---------------------------------------|-------|

|                                                |       |
|------------------------------------------------|-------|
| <b>11. NMR Spectra for New Compounds</b> ..... | SI-55 |
|------------------------------------------------|-------|

### **1. General Experimental**

Chemicals and solvents were purchased from commercial suppliers and used as received. Acetylene cylinder was purchase from Chem-Gas Pte Ltd (Singapore). <sup>1</sup>H NMR, <sup>13</sup>C NMR and <sup>19</sup>F NMR spectra were recorded on a Bruker ACF300 (300 MHz), AV-III400 (400 MHz) or AMX500 (500 MHz) spectrometer. Chemical shifts were calibrated using residual undeuterated solvent as an internal reference (CDCl<sub>3</sub>: 7.26 ppm <sup>1</sup>H NMR, 77 ppm <sup>13</sup>C NMR; 376 ppm <sup>19</sup>F NMR; CD<sub>3</sub>CN: 1.94 ppm <sup>1</sup>H NMR, 1.3 ppm, 118.3 ppm <sup>13</sup>C NMR). Multiplicity was indicated as follows: s (singlet), d (doublet), t (triplet), q (quartet), m (multiplet), dd (doublet of doublet), bs (broad singlet). All high resolution mass spectra (HRMS) were obtained on a Finnigan/MAT 95XL-T spectrometer. All GC analysis was performed on Agilent 7820A&5977E GC-MS. The 20 W LED bulb was purchased from Vtx Solution Pte Ltd (Singapore). The Blue LED strips (1 meter, 10 W; and 2 meter, 20 W) were purchased from Inwares Pte Ltd (Singapore). Further visualization was achieved by staining with iodine, potassium permanganate solution or Dragendorff's reagent followed by heating using a heat gun. Flash chromatography separations were performed on Merck 60 (0.040-0.063 mm) mesh silica gel. Purification of fluorinated styrene products was conducted on Recycling Preparative HPLC equipped with JAIGEL -2H columns (GPC, CHCl<sub>3</sub>, as an eluent) from Japan Analytical Industry Co.,Ltd.

The Asia Syringe Pump was purchased from Syrris Company (UK) for continuous flow setup. The Logato<sup>®</sup> 200 series Syringe pumps were purchased from KD Scientific Inc. (Holliston, MA). The Harvard Syringe Pump was purchased from Harvard Apparatus (Holliston, MA). The Tefzel shut-off valves, HPFA and PFA micro tubings were purchased from IDEX Health&Science (Oak Harbor, WA). The stainless steel shut-off valves and stainless steel micro tubing was purchased from Swagelok (USA). The Digital Mass-Flow controller (SmartTrak 100) was purchased from Sierra Instruments. The membrane-based back pressure regulator was purchased from Zaiput Flow Technologies.

## 2. “Stop-Flow” Micro-Tubing (SFMT) Reactor Platform

### 2.1 Graphical supporting information for the SFMT platform

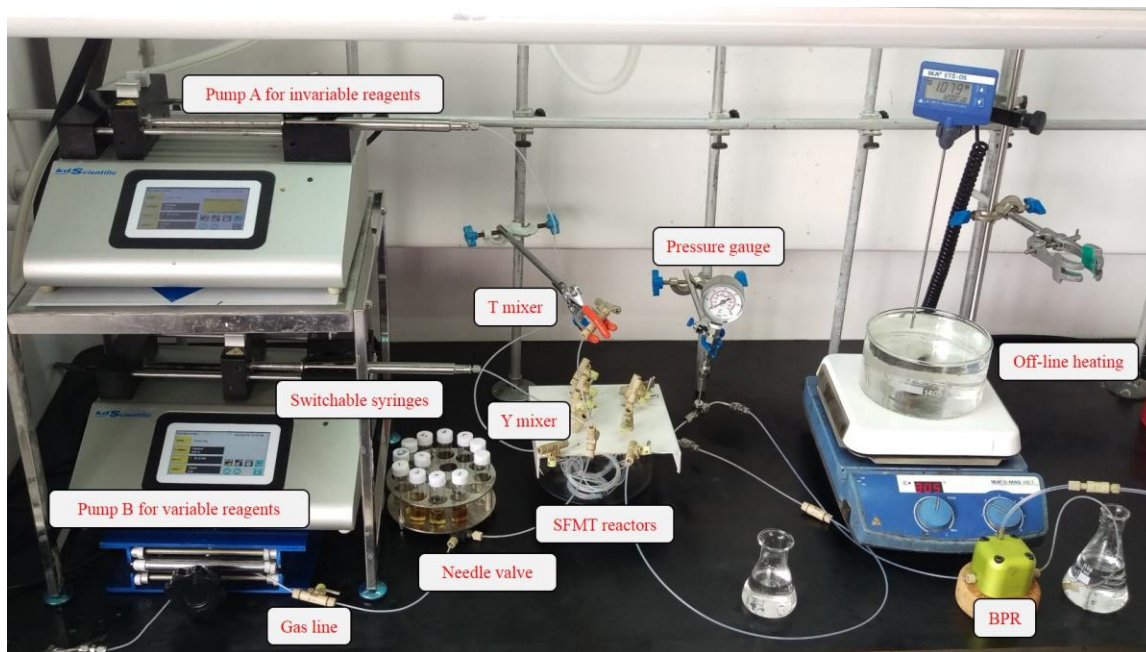

**Figure S1.** A general setup of the SFMT platform for the gas/liquid reaction. The system consists of two syringe pumps (**A** for invariable reagents, **B** for variable reagents; syringes containing different reagents/solvents/catalysts are switchable at **B**), one needle valve for controlling gas rate, a SFMT parallel reactor, one pressure gauge, one back-pressure regulator (BPR) and an off-line heating bath.

### 2.2 Graphical supporting information for individual components

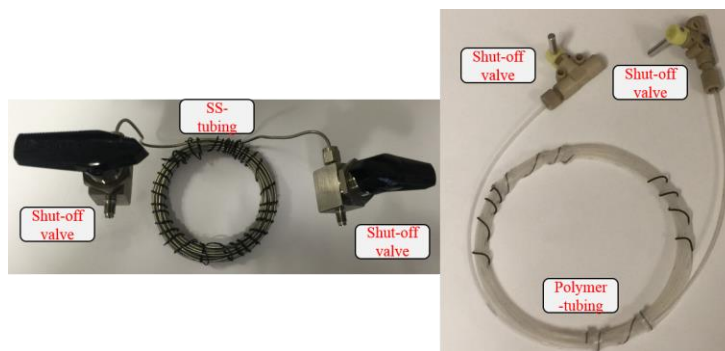

**Figure S2.** SFMT reactors. The left image shows a stainless-steel micro-tubing reactor whereas the right image shows a polymer micro-tubing reactor. The SS-tubing and ball valves were purchased from Swagelok (SS-T1-S-014-6ME, SS-41GS1). The polymer-tubing and shut-off valves were purchased from IDEX (1912L, P-732).

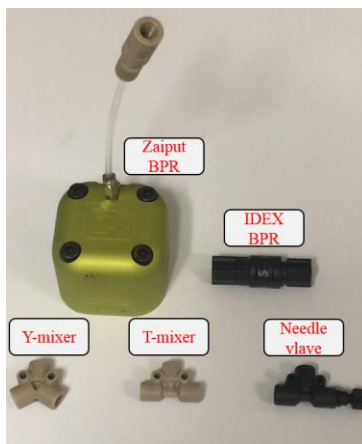

**Figure S3.** Parts required in the SFMT reactor system. The Zaiput BPR was purchased from Zaiput Flow Technologies. The IDEX BPR, Y-mixer, T-mixer, and needle valves were purchased from IDEX.

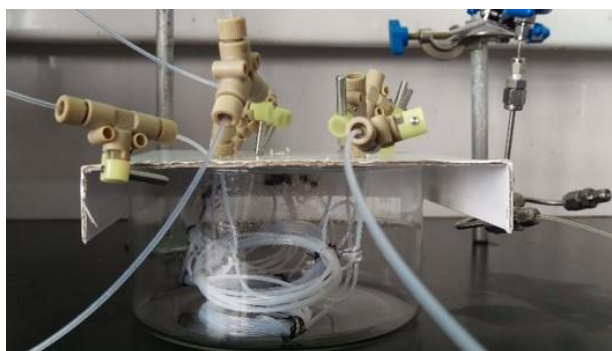

**Figure S4.** A close look at the SFMT parallel reactors.

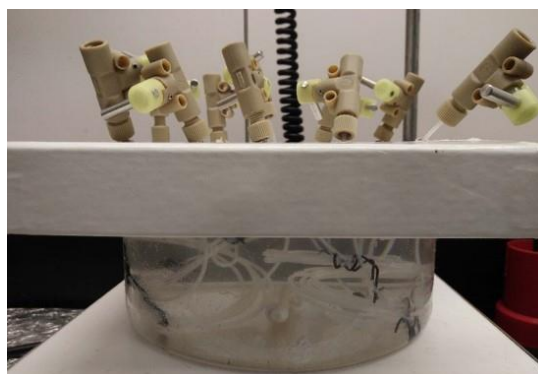

**Figure S5.** The SFMT parallel reactors in an off-line heating bath.

### 3. Mechanism Proposal

#### 3.1 Proposed mechanism for fulvene synthesis using acetylene

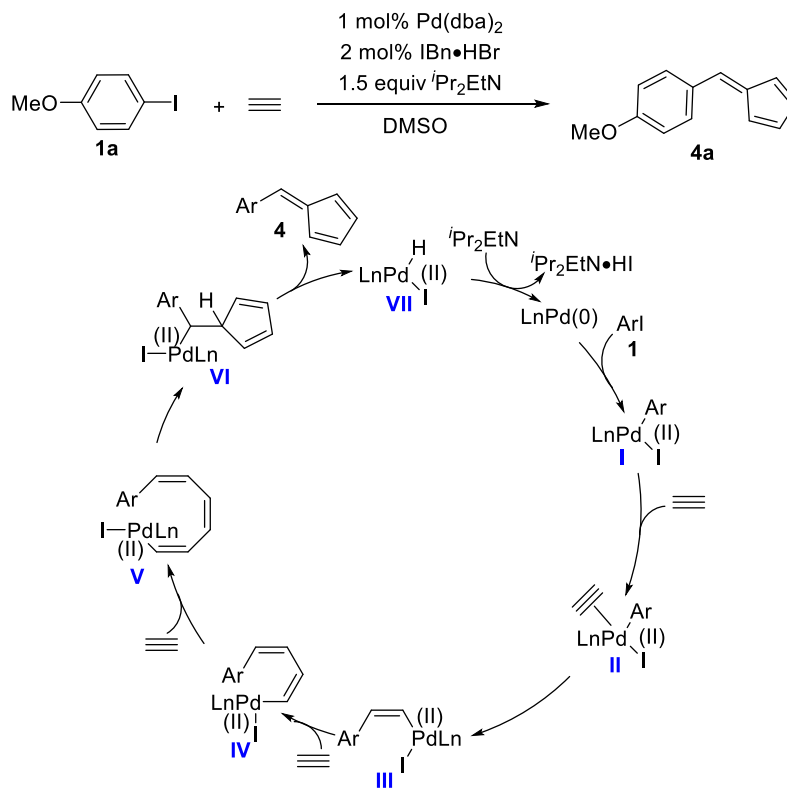

**Figure S6.** Proposed mechanism of Pd-catalyzed fulvene synthesis.

A possible mechanism for the fulvene formation is proposed in Figure S6. Oxidative addition of Pd(0) with aryl iodide forms Pd(II) iodide **I**, which will undergo *syn* addition to acetylene to give vinylpalladium iodide **III**. In the presence of excess acetylene, **III** is converted to triene **V** by two subsequent *syn* additions to acetylene. Subsequently, triene **V** undergoes a suprafacial insertion to give **VI**, followed by a  $\beta$ -hydride elimination to afford the fulvene product. Finally, a reductive elimination of Pd(II) **VII** in the presence of amine bases will regenerate the Pd(0) catalyst.

#### 3.2 Mechanism study for photo-promoted styrene derivative synthesis

1) Does this transformation undergo an oxidative quenching cycle or reductive quenching cycle-based mechanism?

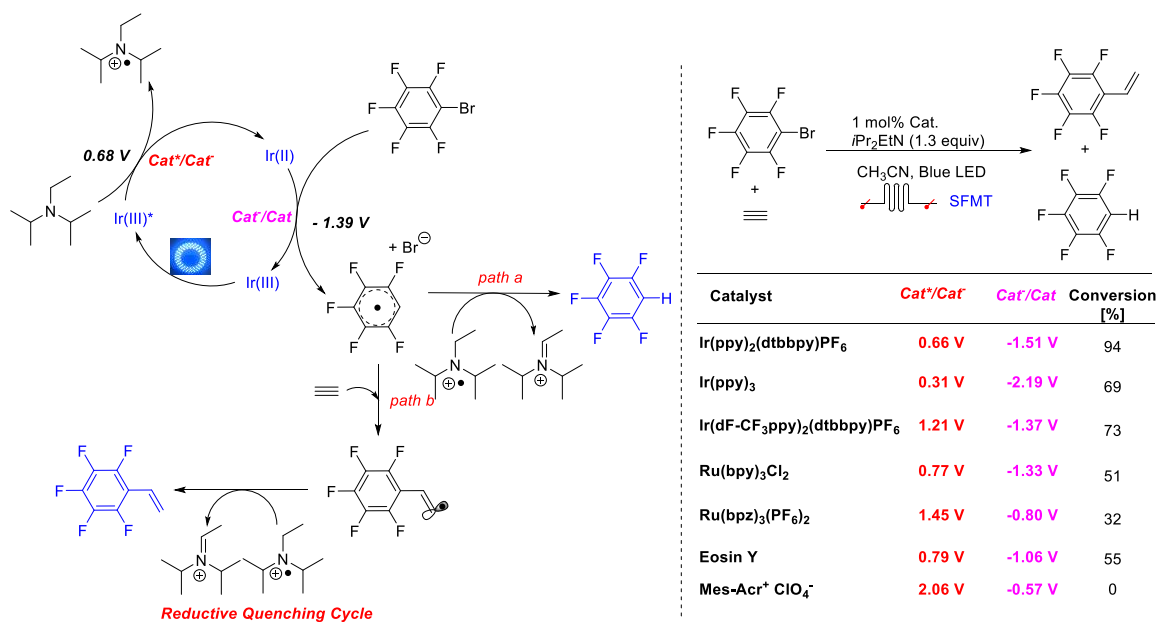

**Figure S7.** Proposed reductive quenching cycle-based mechanism.

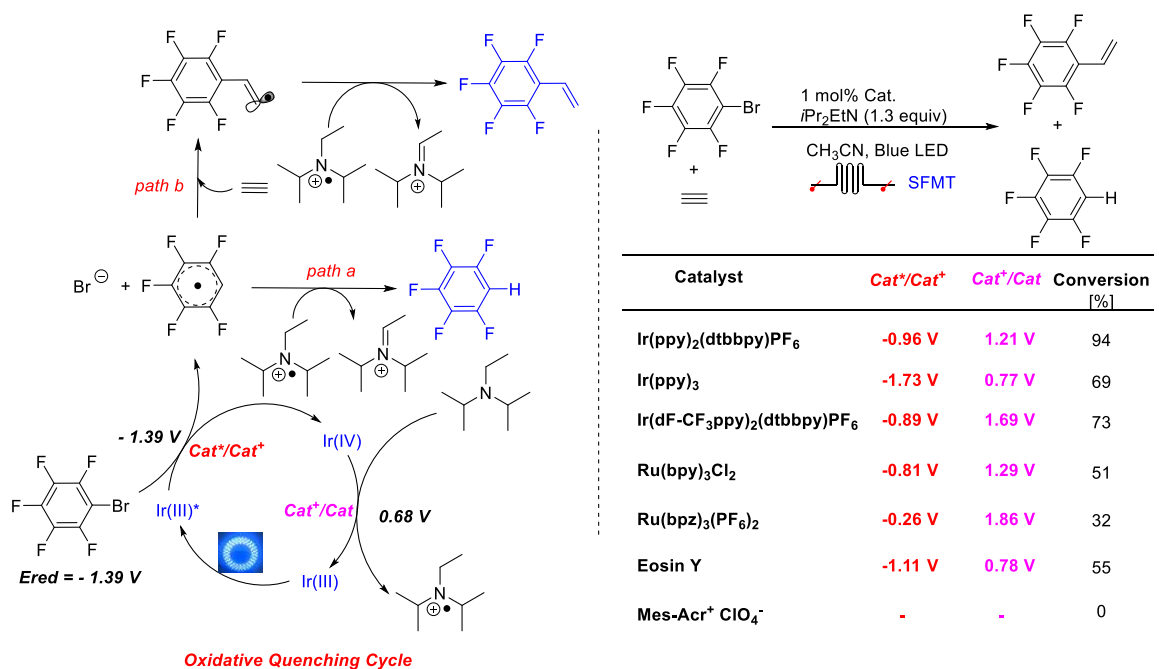

**Figure S8.** Proposed oxidative quenching cycle-based mechanism.

The reductive potential of pentafluorophenylbromide is reported  $\sim -1.39$  V vs SCE.<sup>[1]</sup> The redox potential of  $i\text{Pr}_2\text{EtN}^+/i\text{Pr}_2\text{EtN}$  is  $\sim +0.68$  V vs SCE. As shown in Figure S7, the reductive quenching cycle involves a photoinduced electron transfer from  $i\text{Pr}_2\text{EtN}$  to the

excited photocatalyst and subsequent reoxidation of the generated  $\text{Cat}^-$  by bromopentafluorobenzene. The reduced fluorinated arene cleaves the  $\text{C}_{\text{Ar}}-\text{Br}$  bond yielding the pentafluorophenyl radical, which can be quenched by acetylene (path b) to generate the desired vinyl radical intermediate, or quenched by the amine radical cation (path a) to give debromination byproduct. However, the oxidative quenching cycle is based on photo-induced electron transfer from excited photocatalyst to bromopentafluorobenzene (Figure S8). The reaction proceeded with most of the photocatalysts screened despite the strong oxidative catalyst  $\text{Mes-Arc}^+\text{ClO}_4^-$ . Comparing the redox potential of catalyst triplet states ( $\text{Cat}^*/\text{Cat}^-$ ) and  $i\text{Pr}_2\text{EtN}$ , only  $\text{Ir}(\text{ppy})_3$  is not thermodynamically feasible for the reductive quenching cycle. The next step, reoxidation of the catalyst by the bromopentafluorobenzene ( $E_{1/2}^{\text{red}}$  of  $\text{Cat}^-/\text{Cat}^-$  vs  $E_{1/2}^{\text{red}}$  of bromopentafluorobenzene = -1.39 V), only  $\text{Ru}(\text{bpz})_3(\text{PF}_6)_2$  is not thermodynamically feasible. However, in the oxidative quenching cycle, comparing the redox potential of catalyst triplet states ( $\text{Cat}^*/\text{Cat}^+$ ) and bromopentafluorobenzene, only  $\text{Ir}(\text{ppy})_3$  is thermodynamically favorable, which does not correspond to the experimental results. Therefore, this transformation is more likely proceeded through the reductive quenching cycle. It should be noted, however, that the possibility of the reaction taking place via both reductive and oxidative quenching cycles simultaneously cannot be ruled out.

2) What is the role of TEMPO that leads to an improvement of the product selectivity?

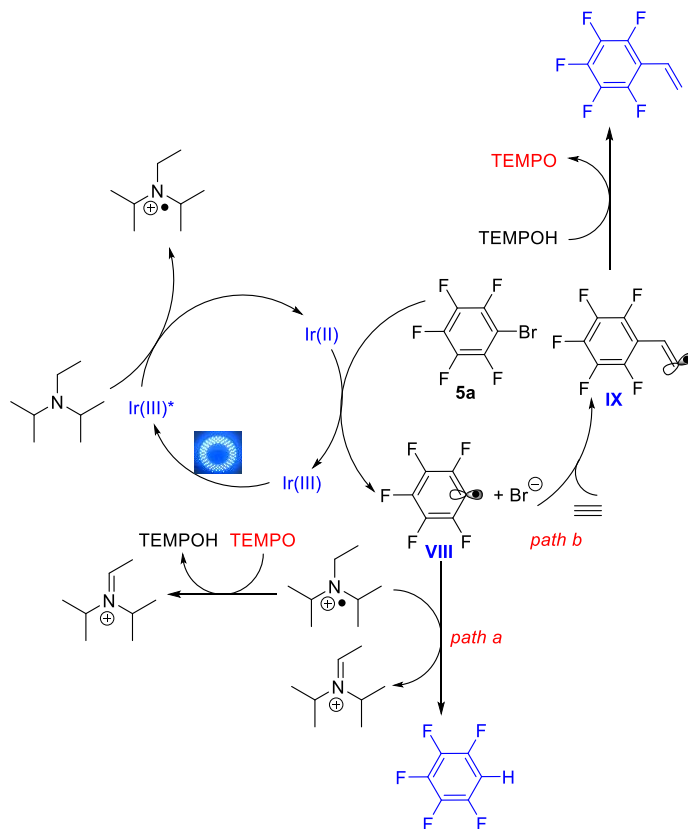

**Figure S9.** Proposed mechanism for photo-promoted styrene derivative synthesis.



As shown in Figure S9, when one equiv TEMPO was used as an additive, the product selectivity was significantly enhanced, probably because that TEMPO can abstract the H-atom from the amine cation radical and force the aryl radical **VIII** to undergo path *b* to react with acetylene gas.

### 3) Trap the pentafluorophenyl radical by 2,6-di-tert-butyl-4-methylphenol

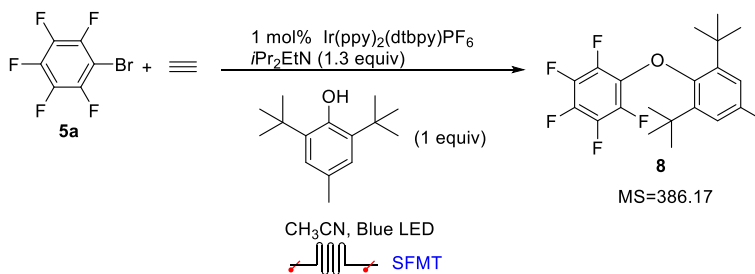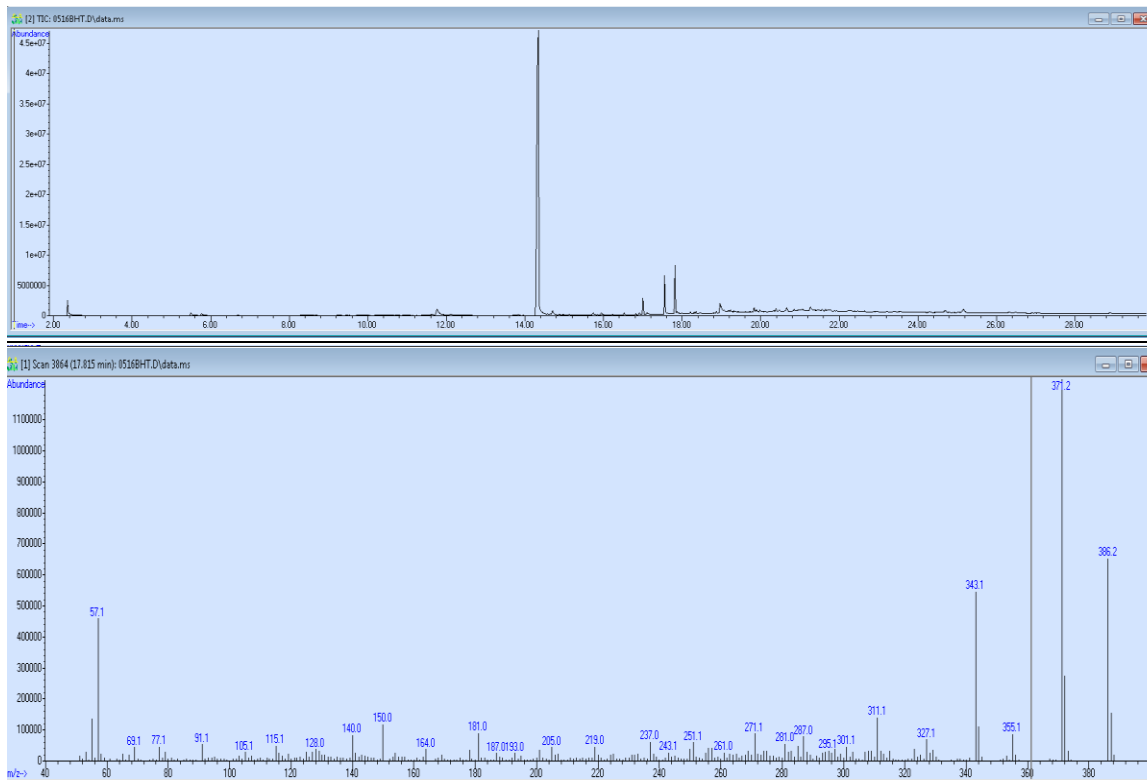

**Figure S10.** Trapping reaction intermediates with 2,6-di-tert-butyl-4-methylphenol.

2,6-Di-tert-butyl-4-methylphenol was added to attempt to trap the reaction intermediates. As indicated by GC-MS analysis of the crude reaction mixture, compound **8** was produced, which indicated the presence of aryl radical **VIII** in the reaction process.

#### 4. Graphical Supporting Information for Reaction Screening Using the SFMT Platform

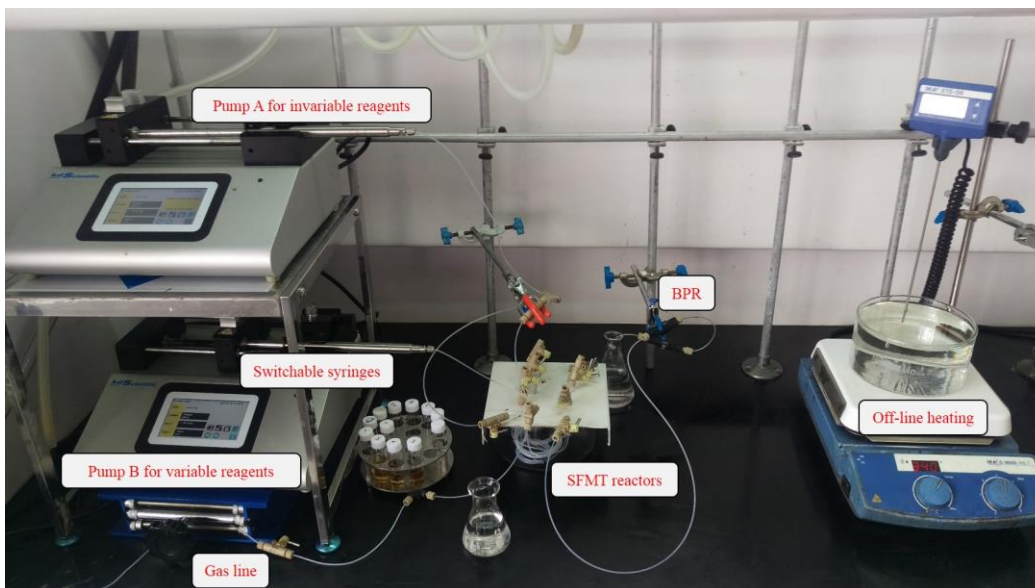

*Step 1:* Setup of the SFMT platform. Fill syringe A with invariable reagents. Fill syringe B with screening targets (variable reagents, catalysts, or solvents, etc).

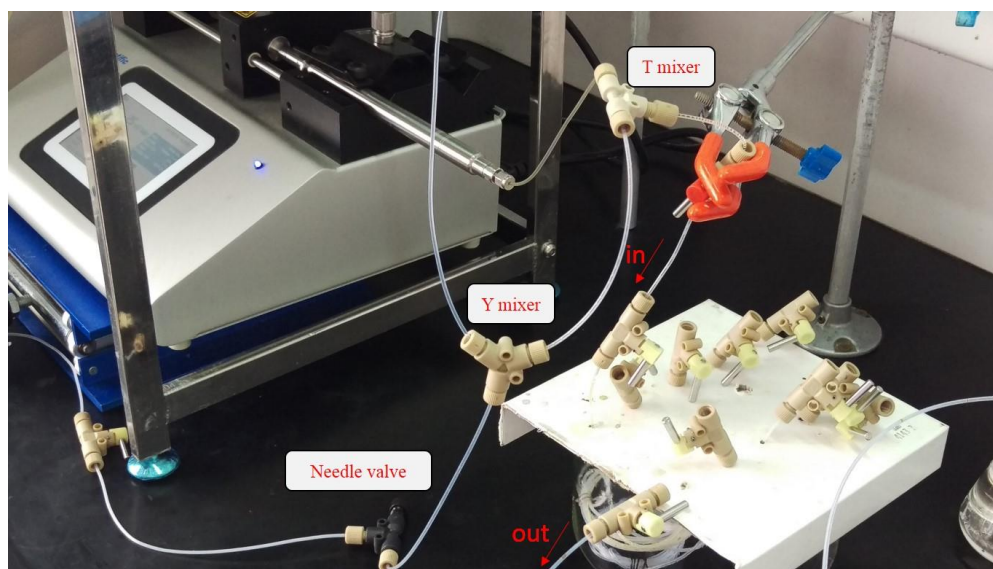

*Step 2:* Start pumping, and open the needle valve to adjust the gas bubbles. Fill in the first micro-tubing reactor with starting gas/liquid reagents.

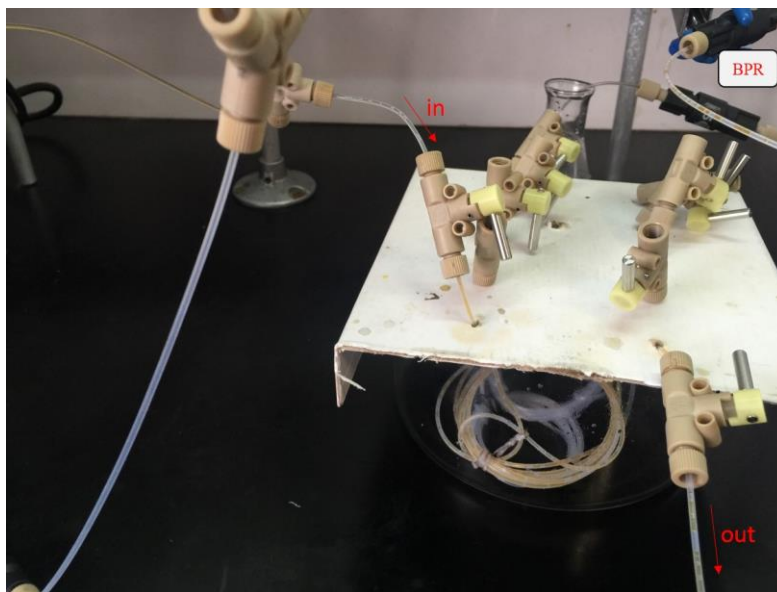

Step 3: Fill in the first micro-tubing reactor and let the reagent mixture go through the BPR.

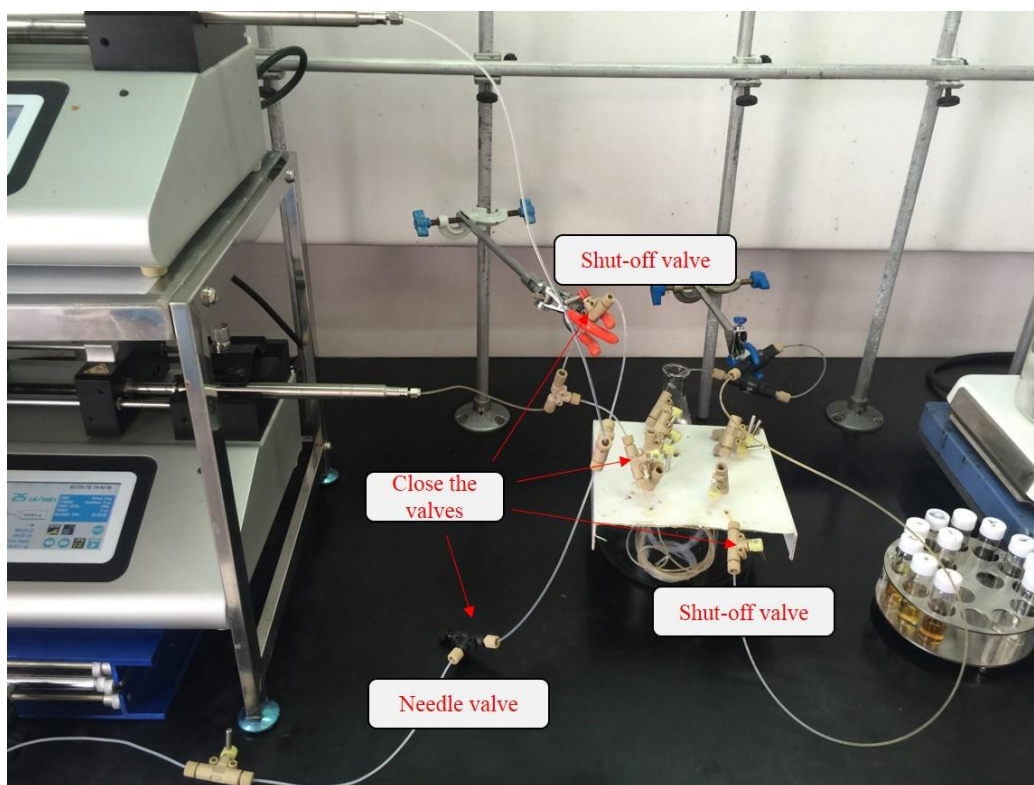

Step 4: Close the shut-off valves. Stop pumping and close the gas needle valve.

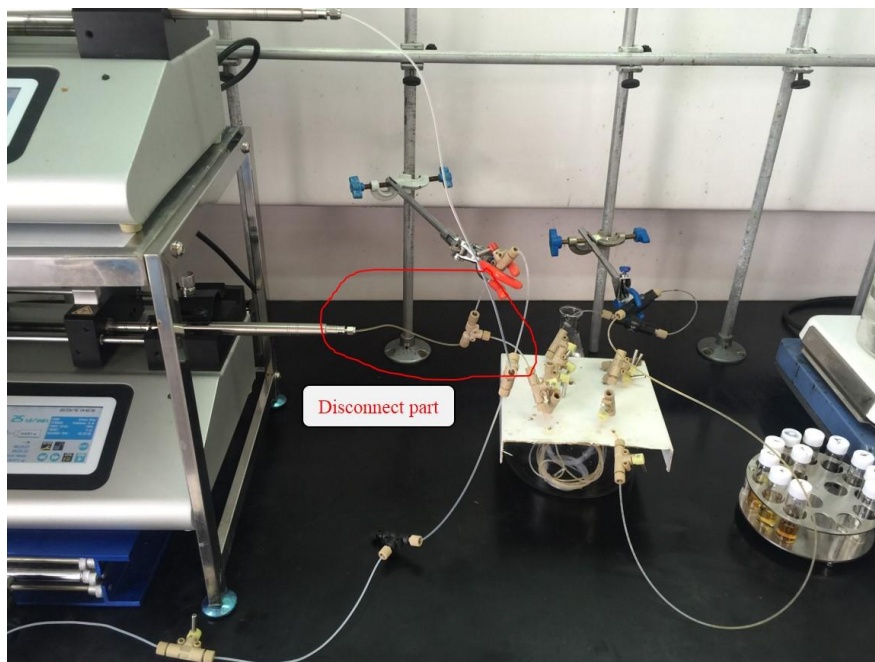

Step 5: Disconnect the switchable syringe and jointers. Switch to the syringe containing next screening reagents/catalyst/solvents.

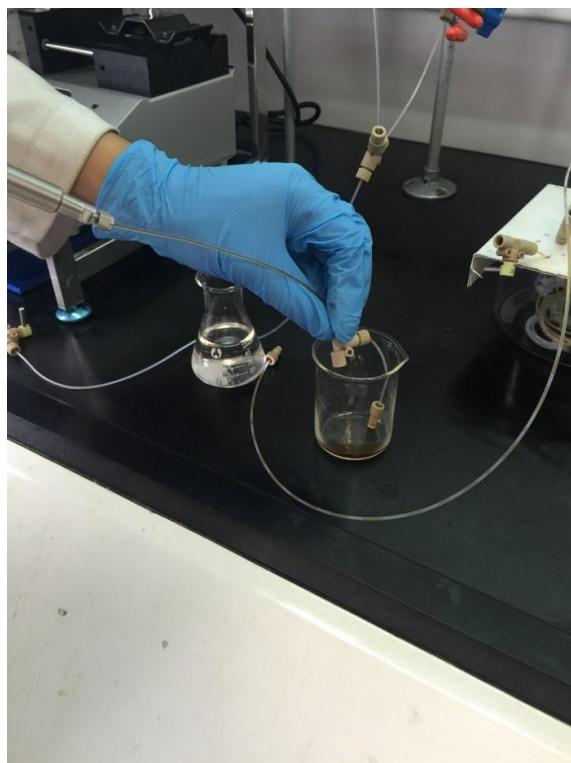

Step 6: The changed parts are rinsed with the washing solvent.

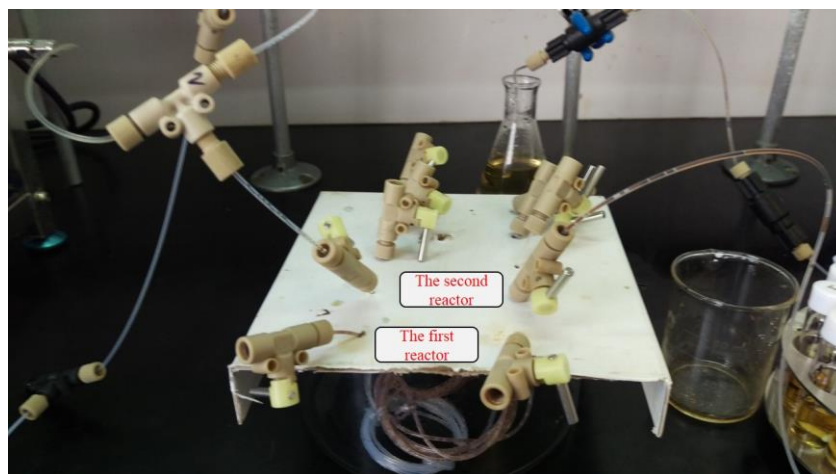

Step 7: The second reactor is filled and closed in the same way.

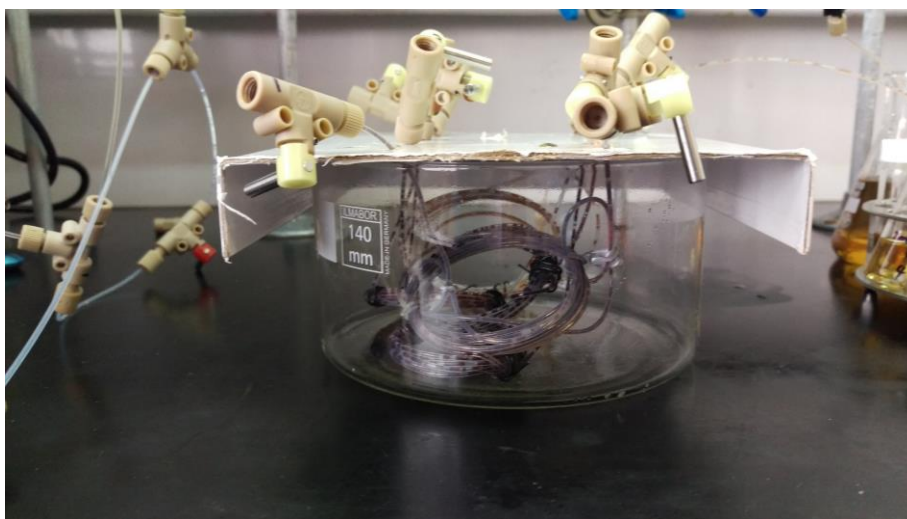

Step 8: All reactors are filled and disconnected from the flow system.

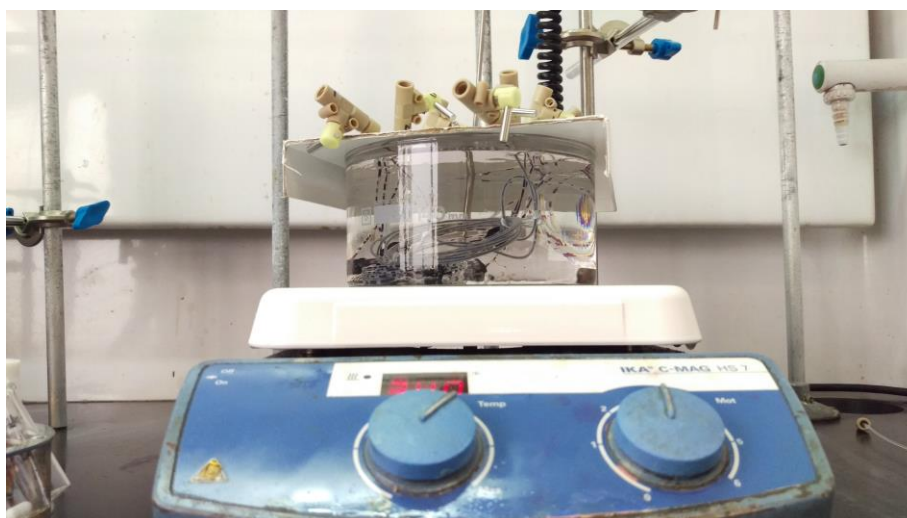

Step 9: The SFMT reactors are moved to an off-line heating bath with desired temperature.

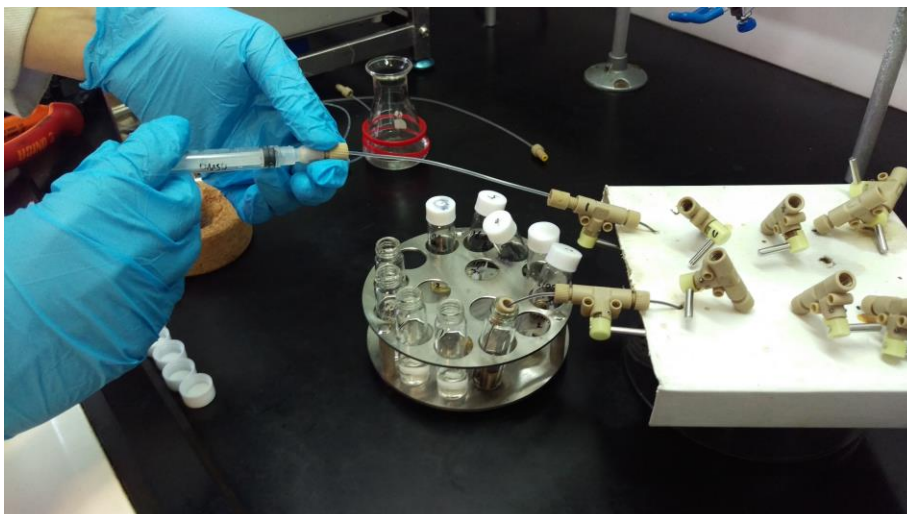

*Step 10:* After desired reaction period, the crude product mixtures are rinsed out to collection vials.

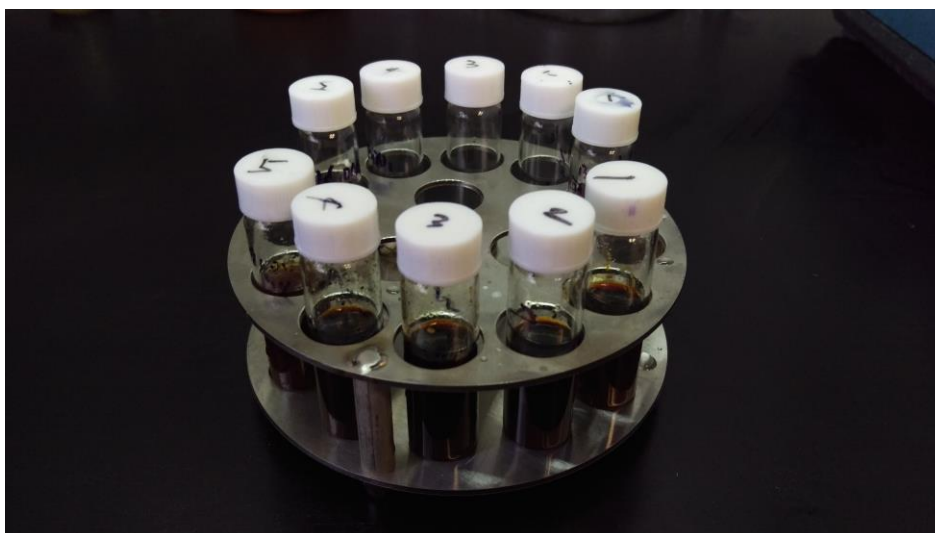

*Step 11:* Collected crude products will be subjected to GCMS and  $^1\text{H}$ NMR for analysis.

## **5. Feasibility Test for SFMT Reactors with Reported Transformations**

### **5.1 Pressure test in the SFMT reactor**

The first pressure test conducted was to examine whether the SFMT reactor can maintain a high pressure during heating. As shown in Figure S11a, an SFMT reactor (made by HPFA, 1/16 inch O.D., 0.03 inch I.D., 100 cm) was connected to a pressure gauge to indicate the pressure inside the reactor. A gas-liquid flow of DCM and argon was pumped through the tubing, using a 100 psi back-pressure regulator to pressurize the system (Figure S11a and b). When the SFMT reactor was heated at 100 °C, the pressure of SFMT reactor was slightly increased from 100 psi to 125 psi. After heating for 1 hour, this pressure was maintained for the duration of the heating period (Figure S11c), and the gas/liquid slug shape was not changed.

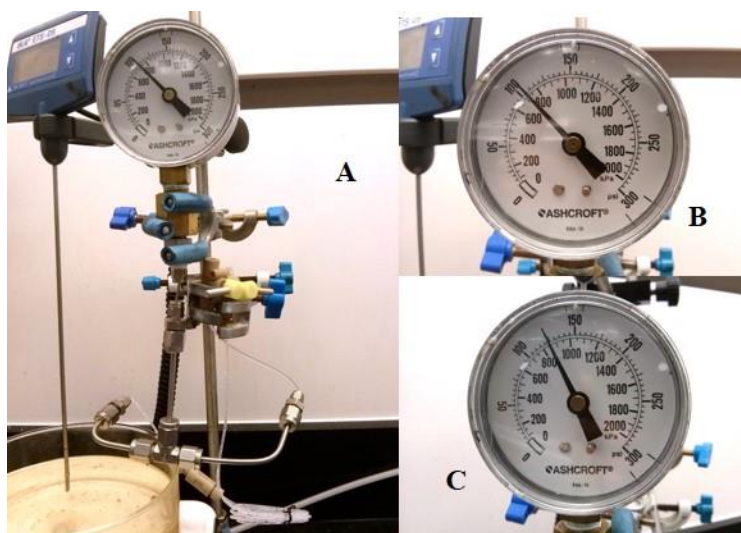

**Figure S11. Pressure test in the SFMT reactor. a,** Setup for the SFMT reactor pressure study. **b,** Pressure before heating. **c,** Pressure after heating for 1 hour.

The ability of the SFMT platform to hold pressure was further tested by increasing the pressure to 1000 psi. Since the pressure limit of the Tefzel shut-off valves were 500 psi, stainless steel valves were used for this test. With a 500 psi and two 250 psi BPRs, for a total of 1000 psi back-pressure, water was pumped into the SFMT reactor (made by HPFA tubing, 1/16 inch O.D., 0.03 I.D., 100 cm) until the pressure gauge read 1000 psi. The valves were then closed, and the tubing reactor was left in room temperature for several hours. It was observed that the pressure decreased slowly to 860 psi within 2 hours and maintained at 860 psi for another 2 hours. This pressure drop can be explained due to the dissolution of pressurized air, which was left in the pressure gauge, into water at high pressure (Figure S12). However, the study supported that the SFMT system can work effectively at pressure as high as 800 psi.

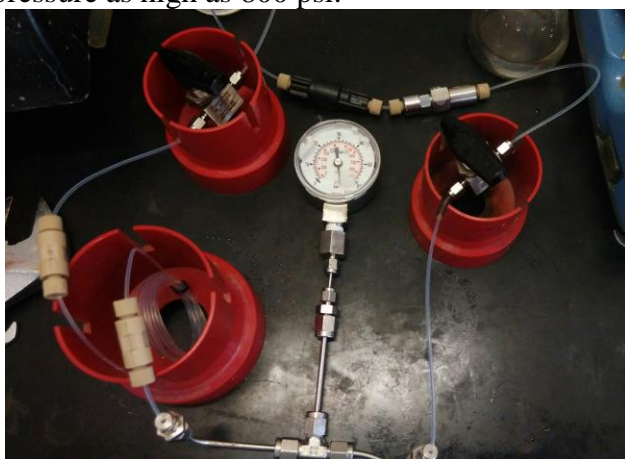

**Figure S12. SFMT reactor pressure study at high pressure.**

## 5.2 Summary of comparison experimental results

The following reported reactions were tested as template reactions to investigate the versatility and feasibility of the SFMT reactor platform (Scheme S1). Reactions were

attempted to perform in batch, continuous-flow and stop-flow reactors with the same reaction parameters (temperature, pressure, concentration, and reaction time) for comparison. The results are summarized in Table S1.

**CO<sub>2</sub> Cycloaddition**

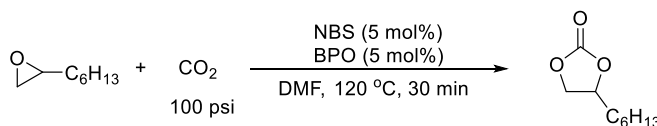

**Singlet Oxygen [4+2] Cycloaddition**

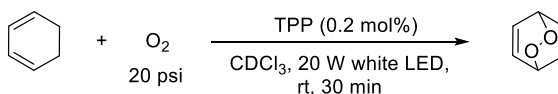

**Diels-Alder Reaction**

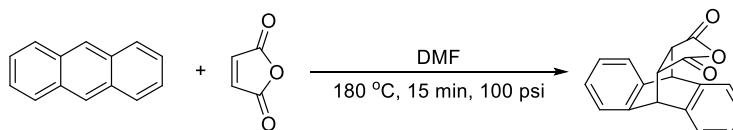

**Jones Oxidation**

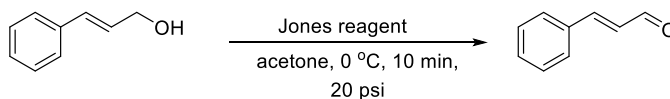

**Biginelli Reaction**

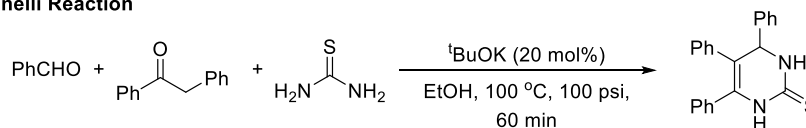

**Trans-Isomerization**

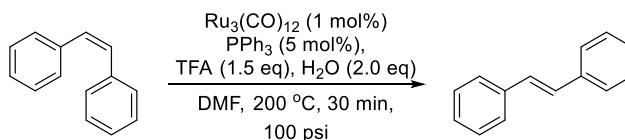

**Olefin Metathesis**

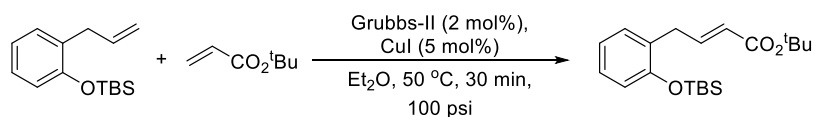

**Scheme S1.** Template reactions for comparison studies.

As shown in Table S1, reaction patterns tested included gas/liquid reactions, liquid/liquid heterogeneous reactions, photo-promoted reactions, and homogeneous reactions. In our hands, reactions in SFMT reactors gave comparable or better yields than those in batch reactors, and were slightly lower than those in continuous-flow reactors, except for the Biginelli reaction. For the Biginelli reaction (entry 5), the product was solid and was insoluble in ethanol, which was found to accumulate in the back-pressure regulator (BPR), causing blockage. In comparison, the solid product was easily removed from the SFMT reactor simply by pressurizing the tubing after the reaction. These comparison studies prove that the SFMT reactor is effective with a wide range of reaction patterns and is instructive enough for reaction optimization/discovery. It also indicates that a



successfully developed reaction in the SFMT reactor can be conveniently transferred to continuous-flow synthesis for large-scale production.

**Table S1.** Comparison of batch, continuous-flow, and SFMT reactors.

| Entry | Reaction                      | Yield [%] <sup>[a]</sup> |                   |                   | Reaction Type     | Remarks                     |
|-------|-------------------------------|--------------------------|-------------------|-------------------|-------------------|-----------------------------|
|       |                               | Batch                    | Continuous-Flow   | Stop-Flow         |                   |                             |
| 1     | CO <sub>2</sub> cycloaddition | 4                        | 64                | 48                | gas/liquid        | high-temp/<br>high-pressure |
| 2     | [4+2] with singlet oxygen     | 49                       | 65                | 62                | gas/liquid        | photo-promoted              |
| 3     | DA-reaction                   | 11                       | 56                | 53                | homogeneous       | high-temp/<br>high-pressure |
| 4     | Jones Oxidation               | 70 <sup>[b]</sup>        | 76 <sup>[b]</sup> | 77 <sup>[b]</sup> | organic/inorganic | strong oxidant              |
| 5     | Biginelli reaction            | 67                       | 49                | 70                | homogeneous       | multi-component             |
| 6     | trans-isomerization           | 72                       | 73                | 62                | homogeneous       | high-temp/<br>high-pressure |
| 7     | olefin metathesis             | 60                       | 73                | 68                | homogeneous       | reversible reaction         |

[a] All yields were determined by <sup>1</sup>H NMR spectrum analysis with 1,3,5-trimethoxybenzene or mesitylene as an internal standard. [b] Isolated yields.

### 5.3 General procedure for batch, continuous-flow, SFMT reactions

#### 1) General setup for SFMT reactions

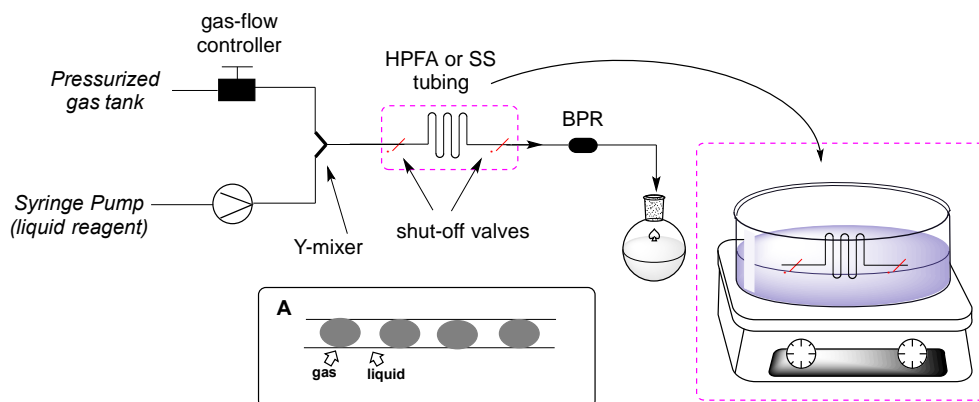

**Figure S13.** Schematic setup of gas-liquid stop-flow reactions.

**Setup A:** As shown in Figure S13, a stainless steel syringe was fixed to a syringe pump and a pressurized gas cylinder was attached to a Y-mixer through HPFA tubing (O.D. 1/16", I.D. 0.03") as inlets. The outlet of Y-mixer was connected to the reactor (HPFA or stainless steel, O.D. 1/16", I.D. 0.03") and the gas-line. The ends of the reactor were connected with two shut-off valves. The outlet of reactor was connected to a back-

pressure regulator (BPR). The gas cylinder was pressurized to ~20 psi higher than the desired back-pressure of the system. A stainless steel syringe was filled with the homogeneous mixture of substrates, catalysts, additives and solvents, and attached to the flow apparatus (syringe pump). The flow apparatus itself was set up with a certain flow rate, and flow rate of gas was adjusted to create 1:1 liquid/gas plugs. After filling the reactor and approximately 2 mins of equilibration, the valves were closed and the tubing reactor was placed into the hot oil bath or under a light source for further reaction.

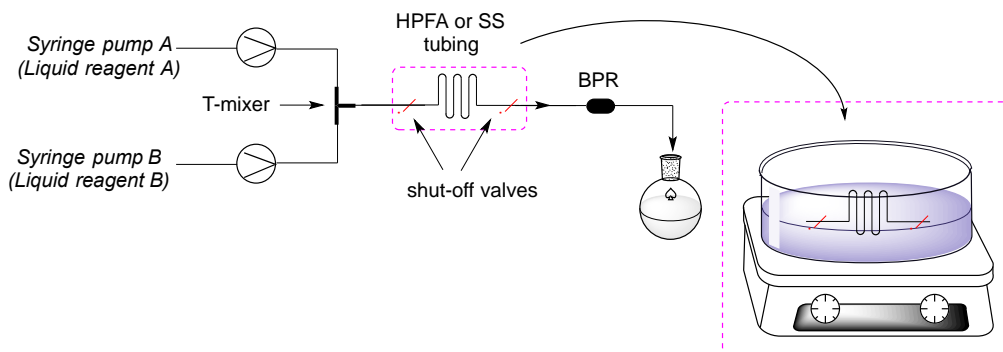

**Figure S14.** Schematic setup of liquid-liquid stop-flow reactions.

**Setup B:** As shown in Figure S14, two stainless steel syringes filled with a solution of substrates A and a solution of B separately were fixed to two syringe pumps (pump A with substrate A, pump B with substrate B). The syringes were attached to a T-mixer through an HPFA tubing (1/16", I.D. 0.03"). The outlet of T-mixer was connected to the reactor (HPFA or stainless steel, 1/16", I.D. 0.03"). The ends of the reactor were attached to two shut-off valves. The outlet of reactor was connected to a back-pressure regulator (BPR). Each syringe pump was set up with different flow rates, and the substrates were introduced into the flow system. After filling the tubing reactor and approximately 2 mins of equilibration, the valves were closed and the tubing reactor was placed into the hot oil bath or under a light source for further reaction.

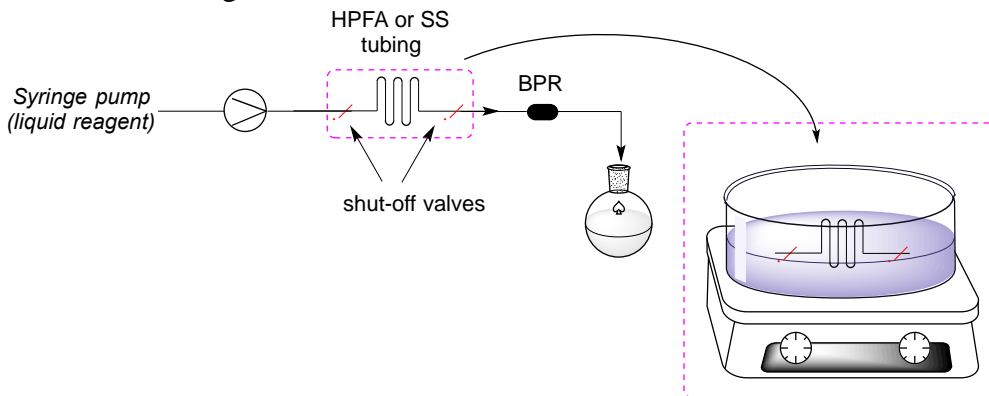

**Figure S15.** Schematic setup of one-stream stop-flow reactions.

**Setup C:** As shown in Figure S15, a stainless steel syringe filled with the reaction mixture was fixed to a syringe pump and directly attached to the reactor (HPFA or stainless steel, 1/16", I.D. 0.03"). The ends of the reactor were attached to two shut-off valves. The outlet of reactor was connected to a back-pressure regulator (BPR). A stainless steel syringe was filled with the homogeneous mixture of substrates, catalysts,

additives and solvents, and attached to the flow apparatus (syringe pump). The flow apparatus was set up with a determined flow rate before the reaction mixture was pumped through the flow system. After filling the reactor and approximately 2 mins of equilibration, the valves were closed and the tubing reactor was placed into the hot oil bath or under a light source for further reactions.

### 2) General setup for continuous-flow reactions

All continuous flow reactions were set up in the same manner as the “stop-flow” setups without the use of shut-off valves at the ends of the reactors. The reactors (HPFA or stainless steel) were attached directly to the main system, and directly immersed in an oil bath, ice bath or exposed to a light source. The gas cylinder was pressurized to ~20 psi higher than the desired back-pressure of the system. A stainless steel syringe was filled with the homogeneous mixture of substrates, catalysts, additives and solvents, and attached to the flow apparatus (syringe pump). The tubing reactor was placed into the oil bath or ice bath or under a light source. The flow apparatus itself was set up at a certain flow rate (according to  $t_R$  and the tubing size), and flow rate of gas was adjusted to create 1:1 liquid/gas plugs. After approximately three residence time period to equilibrate, the solution was collected for the desired time for further work-up.

### 3) General procedure for template reactions in batch, continuous-flow and stop-flow

#### CO<sub>2</sub> Cycloaddition Reaction<sup>[2]</sup>

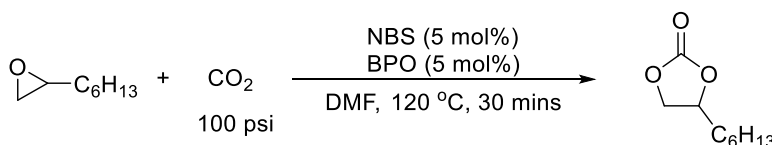

#### Batch Reaction

Under CO<sub>2</sub> atmosphere, a Parr reactor charged with a solution of 1,2-epoxyoctane (1.5 mL, 10 mmol), NBS (89 mg, 0.5 mmol), benzoyl peroxide (120 mg, 0.5 mmol), mesitylene (400 mg, 3.3 mmol) in DMF (4.5 mL) was pressurized to 100 psi with CO<sub>2</sub>. The reaction mixture was heated to 120 °C and stirred for 30 mins. After reaction was completed, cooled in an ice bath, and pressure was released slowly. The reaction mixture was then poured into water and extracted twice with diethyl ether. The combined organic phase was washed with water, dried over sodium sulfate, filtered, and concentrated under reduce pressure with the temperature below 20 °C to avoid loss of internal standard mesitylene, afforded the product in 4% yield according to crude <sup>1</sup>H NMR analysis.

#### Continuous-Flow Reaction

The CO<sub>2</sub> gas cylinder was pressurized to ~20 psi higher than the desired back-pressure of the system (120 psi). A 10 mL volumetric flask was charged with a solution of 1,2-epoxyoctane (1.5 mL, 10 mmol), NBS (89 mg, 0.5 mmol), benzoyl peroxide (120 mg, 0.5 mmol), mesitylene (400 mg, 3.3 mmol) in anhydrous DMF (5.0 mL). An 8 mL, stainless steel Harvard Apparatus syringe was filled with the solution and then attached to the flow apparatus according to setup A. The tubing reactor (stainless steel, 1/16", I.D. 0.03", 762 cm, volume = 3.47 mL) was placed into the oil bath at 120 °C. The flow apparatus itself

was set up with  $t_R = 30$  mins, flow rate = 22.3  $\mu\text{L}/\text{min}$  and flow rate of  $\text{CO}_2$  was adjusted to create 1:1 liquid/gas plugs. After approximately 1.5 hour to equilibrate, the solution was collected for 30 mins and quenched with distilled water, extracted twice with diethyl ether and washed with water. The organic phase was combined and the solvent was removed under reduced pressure with the temperature below 20  $^\circ\text{C}$  to avoid loss of internal standard mesitylene, indicated the desired product in 64% yield according to crude  $^1\text{H}$  NMR analysis.

### Stop-Flow Reaction

The  $\text{CO}_2$  gas cylinder was pressurized to ~20 psi higher than the desired back-pressure of the system (120 psi). A 10 mL volumetric flask was charged with a solution of 1,2-epoxyoctane (1.5 mL, 10 mmol), NBS (89 mg, 0.5 mmol), benzoyl peroxide (120 mg, 0.5 mmol), mesitylene (400 mg, 3.3 mmol) in anhydrous DMF (5.0 mL). An 8 mL, stainless steel Harvard Apparatus syringe was filled with the solution and then attached to the flow apparatus according to setup A. The flow apparatus itself was set up at a flow rate = 22.3  $\mu\text{L}/\text{min}$  and flow rate of  $\text{CO}_2$  was adjusted to create 1:1 liquid/gas plugs. After filling the reactor and 2 mins to equilibrate, the valves were closed and the tubing reactor (stainless steel, 1/16", I.D. 0.03", 762 cm, volume = 3.47 mL) was placed into the oil bath at 120  $^\circ\text{C}$  for 30 mins. Then the solution in the SFMT reactor was washed out by diethyl ether and quenched with distilled water, extracted twice with diethyl ether and washed with water. The organic phase was combined and the solvent removed under reduced pressure with the temperature set below 20  $^\circ\text{C}$  to avoid loss of internal standard mesitylene, indicated the desired product in 48% yield according to crude  $^1\text{H}$  NMR analysis.

### [4+2] Singlet Oxygen Cycloaddition<sup>[3]</sup>

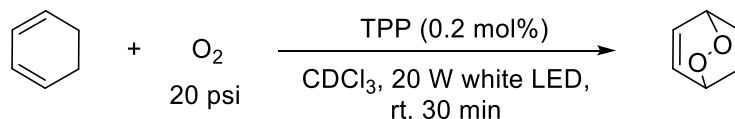

### Batch Reaction

To a round-bottomed flask was added a solution of 1,3-cyclohexadiene (83.3 mg, 1.4 mmol), tetraphenylporphyrin (TPP) (2 mg,  $2.8 \times 10^{-3}$  mmol), and 1,3,5-trimethoxybenzene (79 mg, 0.47 mmol) in  $\text{CDCl}_3$  (5.0 mL). The reaction solution was bubbled with oxygen for 5 mins while protected from light. An oxygen balloon was attached to the flask and the reaction mixture was stirred at rt with a distance of 3-5 cm from a 20 W white LED lamp. After 30 mins, the reaction was analyzed via crude  $^1\text{H}$  NMR which indicated the desired product was obtained in 49% yield.

### Continuous-Flow Reaction

The  $\text{O}_2$  gas cylinder is pressurized to ~20 psi higher than the desired back-pressure (20 psi) of the system. A 10 mL volumetric flask was charged with a solution of 1,3-cyclohexadiene (83.3 mg, 1.4 mmol), tetraphenylporphyrin (TPP) (2 mg,  $2.8 \times 10^{-3}$  mmol), and 1,3,5-trimethoxybenzene (79 mg, 0.47 mmol) in  $\text{CDCl}_3$  (5.0 mL). An 8 mL, stainless steel Harvard Apparatus syringe was filled with the solution and then attached to the flow

apparatus according to setup A. The tubing reactor (HPFA, 1/16", I.D. 0.03", 105 cm, volume = 0.48 mL) was placed at a distance of 3-5 cm to a 20 W white LED lamp. The flow apparatus itself was set up at  $t_R = 30$  mins, flow rate = 7.98  $\mu\text{L}/\text{min}$  and flow rate of  $\text{O}_2$  was adjusted to create a 1:1 liquid/gas plugs. After approximately 1.5 hours to equilibrate, the solution was collected for 30 mins, and analyzed via crude  $^1\text{H}$  NMR analysis, which indicated the desired product was obtained in 65% yield.

### Stop-Flow Reaction

The  $\text{O}_2$  gas cylinder is pressurized to ~20 psi higher than the desired back-pressure of the system (20 psi). A 10 mL volumetric flask was charged with a solution of 1,3-cyclohexadiene (83.3 mg, 1.4 mmol), tetraphenylporphyrin (TPP) (2 mg,  $2.8 \times 10^{-3}$  mmol), and 1,3,5-trimethoxybenzene (79 mg, 0.47 mmol) in  $\text{CDCl}_3$  (5.0 mL). An 8 mL, stainless steel Harvard Apparatus syringe was filled with the solution and then attached to the flow apparatus according to setup A. The flow apparatus itself was set up at a flow rate = 7.98  $\mu\text{L}/\text{min}$  and flow rate of  $\text{O}_2$  was adjusted to create 1:1 liquid/gas plugs. After filling the tubing followed by approximately 2 mins equilibration, valves were closed and the tubing reactor (HPFA, 1/16", I.D. 0.03", 105 cm, volume = 0.48 mL) was placed at a distance of 3-5 cm to a 20 W white LED lamp for 30 mins. Then the crude mixture was analyzed via crude  $^1\text{H}$  NMR, which indicated the desired product was obtained in 62% yield.

### Diels Alder Reaction<sup>[4]</sup>

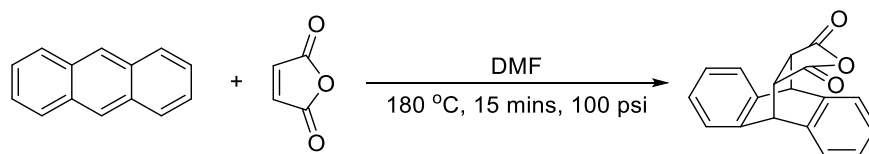

### Batch Reaction

Under  $\text{N}_2$  atmosphere, a seal tube reactor was charged with a solution of anthracene (0.8 g, 4.48 mmol), maleic anhydride (0.4 g, 4.08 mmol) and mesitylene (163 mg, 1.16 mmol) in DMF (10.0 mL) was pressurized to 100 psi with  $\text{N}_2$  and the reaction was heated at 180 °C for 15 min. Then reaction mixture was cooled in an ice bath and the pressure was released slowly. The reaction mixture was poured into water and extracted twice with diethyl ether, and washed with water. The organic phase was combined and concentrated in vacuo with the temperature below 20 °C. The crude residue was analyzed via  $^1\text{H}$  NMR, which indicated an 11% yield of the Diels-Alder product.

### Continuous-Flow Reaction

A 10 mL volumetric flask was charged with a solution of anthracene (0.8 g, 4.48 mmol), maleic anhydride (0.4 g, 4.08 mmol) and mesitylene (163 mg, 1.16 mmol) in DMF (10.0 mL). An 8 mL, stainless steel Harvard Apparatus syringe was filled with the solution and then attached to the flow apparatus according to setup C with BPR (100 psi). The tubing reactor (stainless steel, 1/16", I.D. 0.03", 762 cm, volume = 3.47 mL) was placed into an oil bath at 180 °C. The flow apparatus itself was set up as  $t_R = 15$  mins, flow rate = 227.1  $\mu\text{L}/\text{min}$ . After approximately 45 mins equilibration, the solution was collected for 30 mins, and poured into water, extracted twice with ether, and washed with water. The

organic phase was combined and concentrated in vacuo. The crude residue was analyzed via  $^1\text{H}$  NMR, indicated a 56% yield of the Diels-Alder product.

### Stop-Flow Reaction

A 10 mL volumetric flask was charged with a solution of anthracene (0.8 g, 4.48 mmol), maleic anhydride (0.4 g, 4.08 mmol) and mesitylene (163 mg, 1.16 mmol) in DMF (10.0 mL). An 8 mL, stainless steel Harvard Apparatus syringe was filled with the solution and then attached to the flow apparatus according to setup C with BPR (100 psi). The tubing reactor was filled and after approximately 2 mins equilibration, the valves were closed, and the tubing reactor (stainless steel, 1/16", I.D. 0.03", 762 cm, volume = 3.47 mL) was placed into oil bath at 180 °C for 15 mins. Then the solution in SFMT was washed into water, extracted twice with ether, and washed with water. The organic phase was combined and concentrated under vacuum. The crude residue was analyzed via  $^1\text{H}$  NMR, indicated a 53% yield of the Diels-Alder product.

### Jones Oxidation Reaction<sup>[5]</sup>

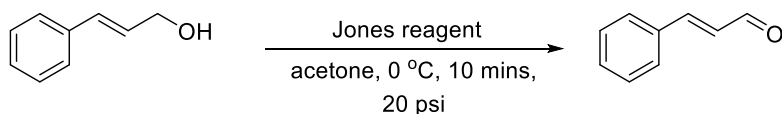

### Batch Reaction

A 50 mL round-bottomed flask was charged with cinnamyl alcohol (250 mg 1.86 mmol) in acetone (5.0 mL) and cooled to 0 °C. A solution of Jones reagent (1.0 mL) in acetone (9.0 mL) was added in one portion. After stirring at 0°C for 10 mins, isopropyl alcohol was added dropwise to quench excess Jones reagent until the color of solution turned to deep green. The solvent was concentrated under reduced pressure, and the crude mixture was dissolved in distilled water and extracted twice with diethyl ether. The combined organic phase was washed with water, dried over anhydrous magnesium sulfate, and concentrated under vacuum. The product was purified by column chromatography to afford 172 mg cinnamaldehyde (70% yield).

### Continuous-Flow Reaction

An 8 mL stainless steel syringe is filled with a solution of cinnamyl alcohol (250 mg 1.86 mmol) in acetone (5.0 mL). A separate 8 mL stainless steel syringe was filled with a solution of Jones reagent (1.0 mL) in acetone (9.0 mL). The two syringes were attached to the flow apparatus (two syringe pump) according to setup B with BPR (20 psi). The tubing reactor (HPFA, 1/16", I.D. 0.03", 400 cm, volume = 1.82 mL) was placed in an ice bath at 0 °C. The flow apparatus itself was set up as  $t_R = 10$  mins, flow rate (pump 1, cinnamyl alcohol) at 60.8  $\mu\text{L}/\text{min}$  and flow rate (pump 2, Jones reagent) at 121.6  $\mu\text{L}/\text{min}$ . After approximately 20 mins to equilibrate, the solution was collected for 10 mins and quenched by isopropyl alcohol. After the solvent was concentrated under reduced pressure, the crude mixture was dissolved in distilled water and extracted twice with diethyl ether. The combined organic phase was washed with water, dried over anhydrous magnesium sulfate, and concentrated under vacuum. The product was purified by column chromatography to afford 22 mg cinnamaldehyde (76% yield).

### Stop Flow Reaction

An 8 mL stainless steel syringe is filled with a solution of cinnamyl alcohol (250 mg 1.86 mmol) in acetone (5.0 mL). A separate 8 mL stainless steel syringe was filled with a solution of Jones reagent (1.0 mL, 10 mmol) in acetone (9.0 mL). The two syringes were attached to the flow apparatus (two syringe pump) according to setup B with BPR (20 psi). The tubing reactor (HPFA, 1/16", I.D. 0.03", 400 cm, volume = 1.82 mL) was placed into ice bath at 0 °C. The flow apparatus itself was set up as flow rate (pump 1, cinnamyl alcohol) at 60.8  $\mu\text{L}/\text{min}$  and flow rate (pump 2, Jones reagent) at 121.6  $\mu\text{L}/\text{min}$ . After the reactor was fully filled and approximate 1 min equilibration, the valves were closed. The tubing reactor (HPFA, 1/16", I.D. 0.03", 400 cm) was kept in an ice bath for 10 mins, before the solution in SFMT was quenched by isopropyl alcohol. After the solvent was concentrated under reduced pressure, the crude mixture was dissolved in distilled water and extracted twice with diethyl ether. The combined organic phase was washed with water, dried over anhydrous magnesium sulfate, and concentrated under vacuum. The product was purified by column chromatography to afford 23 mg cinnamaldehyde (77% yield).

### Biginelli Reaction<sup>[6]</sup>

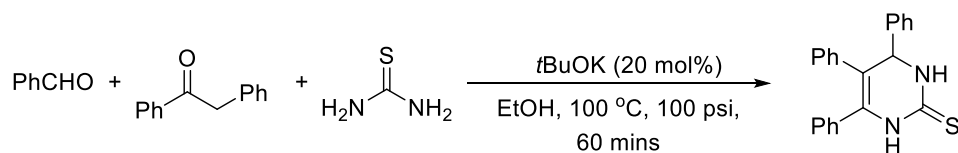

### Batch Reaction

Under Ar atmosphere, a Parr reactor was charged with a solution of benzaldehyde (106 mg, 1 mmol), 2-phenylacetophenone (196 mg, 1.1 mmol), thiourea (152 mg, 2 mmol), and 1,3,5-trimethoxybenzene (55.5 mg, 0.33 mmol) in ethanol (5.0 mL). *t*BuOK (22 mg, 0.2 mmol) was added, and the reactor was pressurized to 100 psi with Ar and stirred at 100 °C for 60 min, then cooled in an ice bath and the pressure was released slowly. The resulting reaction mixture was collected into a vial and the solvent was removed under reduced pressure. The crude mixture was analyzed by <sup>1</sup>H NMR and indicated a 67% yield of the desired product.

### Continuous-Flow Reaction

A 25 mL vial was charged with a solution of benzaldehyde (106 mg, 1 mmol), 2-phenylacetophenone (196 mg, 1.1 mmol), thiourea (152 mg, 2.0 mmol), and 1,3,5-trimethoxybenzene (55.5 mg, 0.33 mmol) in ethanol (5.0 mL). <sup>t</sup>BuOK (22 mg, 0.2 mmol) was added, then the vial was bubbled with Ar for 5 mins. An 8 mL, stainless steel Harvard Apparatus syringe was filled with the solution and then attached to the flow apparatus according to setup C with BPR (100 psi). The tubing reactor (HPFA, 1/16", I.D. 0.03", 400 cm, volume = 1.82 mL) was placed in an oil bath at 100 °C. The flow apparatus itself was set up at  $t_R = 60$  mins, flow rate at 30.4  $\mu\text{L}/\text{min}$ . After approximate 60 mins equilibration, the solution was collected for 60 mins. The solvent was removed

under reduced pressure. The crude mixture was analyzed by  $^1\text{H}$  NMR to indicate a 49% yield of the desired product.

### Stop-Flow Reaction

A 25 mL vial was charged with a solution of benzaldehyde (106 mg, 1 mmol), 2-phenylacetophenone (196 mg, 1.1 mmol), thiourea (152 mg, 2.0 mmol), and 1,3,5-trimethoxybenzene (55.5 mg, 0.33 mmol) in ethanol (5.0 mL).  $^t\text{BuOK}$  (22 mg, 0.2 mmol) was added, and the vial was bubbled with Ar for 5 mins. An 8 mL stainless steel Harvard Apparatus syringe was filled with the solution and then attached to the flow apparatus according to setup C with BPR (100 psi). The flow apparatus itself was set up at flow rate 30.4  $\mu\text{L}/\text{min}$ . After approximate 5 mins equilibration, the valves were closed, and the tubing reactor (HPFA, 1/16", I.D. 0.03", 400 cm, volume = 1.82 mL) was placed in an oil bath at 100  $^\circ\text{C}$  for 60 mins. Then the reaction mixture was cooled to rt and the solvent was removed under reduced pressure. The crude mixture was analyzed by  $^1\text{H}$  NMR which indicated a 70% yield of the desired product.

### Trans-isomerization Reaction<sup>[7]</sup>

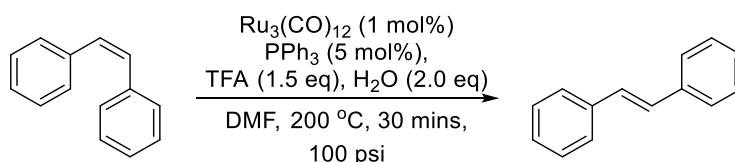

### Batch Reaction

Under Ar atmosphere, a seal tube reactor was charged with a solution of  $\text{Ru}_3(\text{CO})_{12}$  (16 mg, 0.025 mmol), cis-stilbene (0.45 mL, 2.5 mmol), triphenylphosphine (33 mg, 0.125 mmol), trifluoroacetic acid (0.29 mL, 3.75 mmol),  $\text{H}_2\text{O}$  (90 mg, 5.0 mmol), 1,3,5-trimethoxybenzene (140 mg, 0.83 mmol) in DMF (5.0 mL), which was pressurized to 100 psi with Ar and stirred at 200  $^\circ\text{C}$  for 30 min. Then the reactor was cooled in an ice bath and the pressure was released slowly. The solution was poured into water and extracted twice with ether. The combined organic phase was concentrated in vacuo and analyzed by crude  $^1\text{H}$  NMR, indicated a 72% yield of the desired product.

### Continuous-Flow Reaction

A 10 mL vial was charged with a solution of  $\text{Ru}_3(\text{CO})_{12}$  (16 mg, 0.025 mmol), cis-stilbene (0.45 mL, 2.5 mmol), triphenylphosphine (33 mg, 0.125 mmol), trifluoroacetic acid (0.29 mL, 3.75 mmol),  $\text{H}_2\text{O}$  (90 mg, 5.0 mmol), 1,3,5-trimethoxybenzene (140 mg, 0.83 mmol) in DMF (5.0 mL). An 8 mL, stainless steel Harvard Apparatus syringe was filled with the solution and then attached to the flow apparatus according to setup C with BPR (100 psi). The tubing reactor (stainless steel, 1/16", I.D. 0.03", 150 cm, volume = 0.68 mL) was placed into oil bath at 200  $^\circ\text{C}$ . The flow apparatus itself was set up at  $t_{\text{R}}$  = 30 mins, flow rate = 22.8  $\mu\text{L}/\text{min}$ . After approximate 90 mins equilibration, the solution was collected for 30 mins and poured into water and extracted twice with ether. The combined organic phase was concentrated in vacuo and analyzed by crude  $^1\text{H}$  NMR, indicated a 73% yield of the desired product.



### Stop-Flow Reaction

A 10 mL vial was charged with a solution of  $\text{Ru}_3(\text{CO})_{12}$  (16 mg, 0.025 mmol), cis-stilbene (0.45 mL, 2.5 mmol), triphenylphosphine (33 mg, 0.125 mmol), trifluoroacetic acid (0.29 mL, 3.75 mmol),  $\text{H}_2\text{O}$  (90 mg, 5.0 mmol), 1,3,5-trimethoxybenzene (140 mg, 0.83 mmol) in DMF (5.0 mL). An 8 mL, stainless steel Harvard Apparatus syringe was filled with the solution and then attached to the flow apparatus according to setup C with BPR (100 psi). The flow apparatus itself was set up at a flow rate = 22.8  $\mu\text{L}/\text{min}$ . After approximate 2 mins equilibration, the valves were closed and the tubing reactor (stainless steel, 1/16", I.D. 0.03", 150 cm, volume = 0.68 mL) was placed in an oil bath at 200 °C for 30 mins. Then the solution in SFMT reactor was washed out with diethyl ether into water and extracted twice with ether. The combined organic phase was concentrated in vacuo and analyzed by crude  $^1\text{H}$  NMR, indicated a 62% yield of the desired product.

### Olefin Metathesis<sup>[8]</sup>

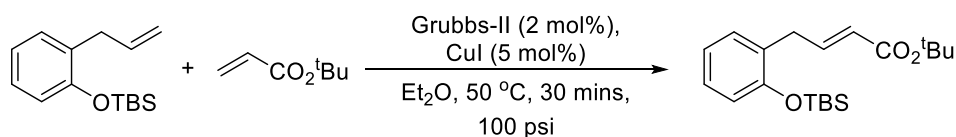

### Batch Reaction

Under Ar atmosphere, a Parr reactor charged with a solution of tert-butyl(2-allylphenoxy)dimethylsilane (124 mg, 0.50 mmol), tert-butyl acrylate (192 mg, 1.50 mmol), Grubbs-II catalyst (8.5 mg, 10.0  $\mu\text{mol}$ ), CuI (2.9 mg, 15.0  $\mu\text{mol}$ ), mesitylene (20.4 mg, 0.17 mmol) in diethyl ether (5.0 mL) was pressurized to 100 psi with Ar and stirred at 50 °C for 30 mins. After cooling in an ice bath, water was added and the mixture was extracted twice with ether. The organic phase was combined and concentrated under reduced pressure, indicated the desired product in 60% yield according to crude  $^1\text{H}$  NMR analysis.

### Continuous-Flow Reaction

A 10 mL vial was charged with a solution of tert-butyl(2-allylphenoxy)dimethylsilane (124 mg, 0.50 mmol), tert-butyl acrylate (192 mg, 1.50 mmol), Grubbs-II catalyst (8.5 mg, 10.0  $\mu\text{mol}$ ), CuI (2.9 mg, 15.0  $\mu\text{mol}$ ), mesitylene (20.4 mg, 0.17 mmol) in diethyl ether (5.0 mL). An 8 mL, stainless steel Harvard Apparatus syringe was filled with the solution and then attached to the flow apparatus according to setup C with BPR (100 psi). The tubing reactor (HPFA, 1/16", I.D. 0.03", 105 cm, volume = 0.48 mL) was placed in an oil bath at 50 °C. The flow apparatus itself was set up with  $t_{\text{R}} = 30$  mins, flow rate = 15.96  $\mu\text{L}/\text{min}$ . After approximate 90 mins equilibration, the flow was collected for 30 mins. Then the product was poured into water and extracted twice with ether. The organic phase was combined and concentrated under reduced pressure. The crude  $^1\text{H}$  NMR analysis indicated the desired product in a 73% yield.

### Stop-Flow Reaction

A 10 mL vial was charged with a solution of tert-butyl(2-allylphenoxy)dimethylsilane (124 mg, 0.50 mmol), tert-butyl acrylate (192 mg, 1.50 mmol), Grubbs-II catalyst (8.5 mg, 10.0  $\mu$ mol), CuI (2.9 mg, 15.0  $\mu$ mol), mesitylene (20.4 mg, 0.17 mmol) in diethyl ether (5.0 mL). An 8 mL, stainless steel Harvard Apparatus syringe was filled with the solution and then attached to the flow apparatus according to setup C with BPR (100 psi). The microtubing was filled and after approximate 2 mins equilibration, the valves were closed. The tubing reactor (HPFA, 1/16", I.D. 0.03", 105 cm, volume = 0.48 mL) was placed in an oil bath at 50 °C for 30 mins. Then the solution in SFMT was poured into water and extracted twice with ether. The organic phase was combined and concentrated under reduced pressure, indicating that the desired product was obtained in 68% yield according to crude  $^1\text{H}$  NMR analysis.

## 6. Sonogashira Coupling with Acetylene

### 6.1 Reaction optimization

Reaction optimization was conducted with the SFMT system.

**Table S2.** Reaction optimization of Sonogashira coupling with acetylene (with selected data).

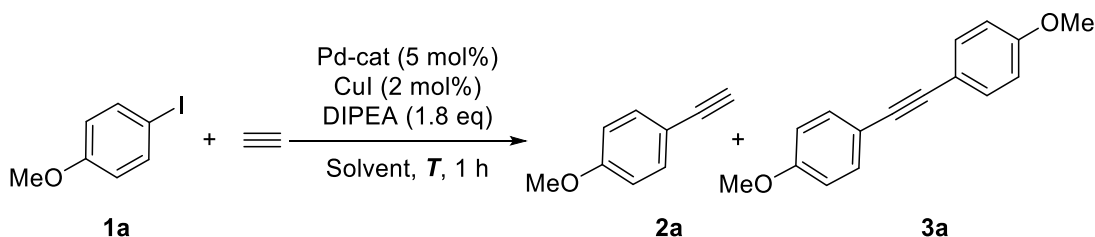

| Entry <sup>[a]</sup>    | Pd-cat                                               | Solvent     | $T$ [°C]  | Yield of <b>2a</b> [%] <sup>[b]</sup> | Yield of <b>3a</b> [%] <sup>[b]</sup> |
|-------------------------|------------------------------------------------------|-------------|-----------|---------------------------------------|---------------------------------------|
| 1                       | Pd(PPh <sub>3</sub> ) <sub>2</sub> Cl <sub>2</sub>   | DMSO        | 100       | 73                                    | 3                                     |
| 2                       | Pd(PPh <sub>3</sub> ) <sub>2</sub> Cl <sub>2</sub>   | DMF         | 100       | 20                                    | <1                                    |
| 3                       | Pd(PPh <sub>3</sub> ) <sub>2</sub> Cl <sub>2</sub>   | NMP         | 100       | <1                                    | <1                                    |
| 4 <sup>[c]</sup>        | Pd(PPh <sub>3</sub> ) <sub>2</sub> Cl <sub>2</sub>   | DMSO        | 100       | 24                                    | <1                                    |
| 5                       | Pd(PPh <sub>3</sub> ) <sub>4</sub>                   | DMSO        | 100       | 73                                    | 3                                     |
| 6                       | Pd(dppf)Cl <sub>2</sub>                              | DMSO        | 100       | 56                                    | 2                                     |
| 7 <sup>[d]</sup>        | Pd(dba) <sub>2</sub> /PPh <sub>3</sub>               | DMSO        | 100       | 54                                    | 3                                     |
| 8                       | Pd(PPh <sub>3</sub> ) <sub>2</sub> Cl <sub>2</sub>   | DMSO        | 60        | 80                                    | 4                                     |
| 9                       | Pd(PPh <sub>3</sub> ) <sub>2</sub> Cl <sub>2</sub>   | DMSO        | 40        | 87                                    | 2                                     |
| 10                      | Pd(PPh <sub>3</sub> ) <sub>2</sub> Cl <sub>2</sub>   | DMSO        | rt        | 78                                    | 3                                     |
| <b>11<sup>[e]</sup></b> | <b>Pd(PPh<sub>3</sub>)<sub>2</sub>Cl<sub>2</sub></b> | <b>DMSO</b> | <b>rt</b> | <b>96</b>                             | <b>4</b>                              |

[a] Reactions were carried out with **1a** (0.1 M). [b] Yields were determined by GC analysis with 1,3,5-trimethoxybenzene as the internal standard. [c] The reaction was carried out with 1 mol% Pd(PPh<sub>3</sub>)<sub>2</sub>Cl<sub>2</sub>. [d] The reaction was carried out with 5 mol% Pd(dba)<sub>2</sub> and 10 mol% PPh<sub>3</sub>. [e] The reaction was conducted for 2 h reaction time before quenching.

### 6.2 General procedure for batch, SFMT, and continuous-flow reactions

### **General procedure A (batch reaction)**

Under N<sub>2</sub> atmosphere, a solution of aryl iodide (1.0 mmol), Pd(PPh<sub>3</sub>)<sub>2</sub>Cl<sub>2</sub> (35.1 mg, 0.05 mmol, 5 mol%), copper(I) iodide (3.8 mg, 0.02 mmol, 2 mol%), DIPEA (310 μL, 1.8 mmol, 1.8 equiv) and 1,3,5-trimethoxybenzene (84.0 mg, 0.5 mmol, 0.5 eq) in DMSO (10.0 mL) was bubbled with acetylene carefully for 5 min and stirred at r.t for 2 h. Then the mixture was quenched by 10 mL saturated NH<sub>4</sub>Cl aqueous solution, extracted by diethyl ether (5 mL x 2), and the organic phase was combined to check the yield by GC analysis of the crude mixture (1,3,5-trimethoxybenzene as the internal standard).

### **General procedure B (using SFMT reactors)**

The acetylene tank is pressurized to ~20 psi higher than the desired back-pressure (5 psi) of the system. A flame dried 10 mL round bottom flask was equipped with a rubber septum and magnetic stir bar and was charged with aryl iodide (0.25 mmol), Pd(PPh<sub>3</sub>)<sub>2</sub>Cl<sub>2</sub> (8.5 mg, 0.0125 mmol, 5 mol%), copper(I) iodide (1.0 mg, 0.005 mmol, 2 mol%), DIPEA (80 μL, 0.45 mmol, 1.8 eq) and 1,3,5-trimethoxybenzene (21.0 mg, 0.125 mmol, 0.5 eq) in DMSO (2.5 mL). The mixture was bubbled with argon for 15 min. A stainless steel syringe was filled with the solution and then attached to the flow apparatus (syringe pump). The stop-flow micro tubing reactor was made of HPFA tubing (O.D. 1/16", I.D. 0.03", 300 cm, volume = 1.37 mL). The flow apparatus itself was set up at a flow rate = 300 μL/min, and flow of acetylene was adjusted to create ~1:1 liquid/gas plugs. After approximately 2 min equilibration, the valves were closed, and the tubing was held at r.t or in the oil bath at 60 °C, and kept for 2 h. Then the mixture was quenched with saturated NH<sub>4</sub>Cl aqueous solution (4.0 mL), extracted with DMSO (0.5 mL) and diethyl ether (1.5 mL) in sequence. After separation, the organic phase was collected for GC analysis to check the yield (1,3,5-trimethoxybenzene as the internal standard).

### **General procedure C (continuous-flow reactions)**

The acetylene tank is pressurized to ~30 psi. A flame dried 10 mL round bottom flask was equipped with a rubber septum and a magnetic stir bar and was charged with aryl iodide (1.0 mmol), Pd(PPh<sub>3</sub>)<sub>2</sub>Cl<sub>2</sub> (35.1 mg, 0.05 mmol, 5 mol%), copper(I) iodide (3.8 mg, 0.02 mmol, 2 mol%), DIPEA (310 μL, 1.8 mmol, 1.8 eq) and 1,3,5-

trimethoxybenzene (84 mg, 0.5 mmol, 0.5 eq) in DMSO (10.0 mL). The mixture was vacuum degassed before adding DIPEA and argon protection. An Asia pump was applied to pump the reaction mixture. The tubing reactor (HPFA, O.D. 1/16", I.D. 0.03", 600 cm, volume = 2.74 mL) was placed at r.t. The flow apparatus itself was set up at a flow rate = 12  $\mu$ L/min,  $t_R$  = 2 h and flow of acetylene was adjusted to create 1:1 liquid/gas plugs. After approximately 4 h for equilibration, the solution was collected for 30 mins, and quenched with saturated  $\text{NH}_4\text{Cl}$  aqueous solution (4.0 mL) and diethyl ether (1.5 mL). After separation, the organic phase was collected for GC analysis of the crude mixture to check the yield (1,3,5-trimethoxybenzene as the internal standard).

### 6.3 Large-scale continuous production

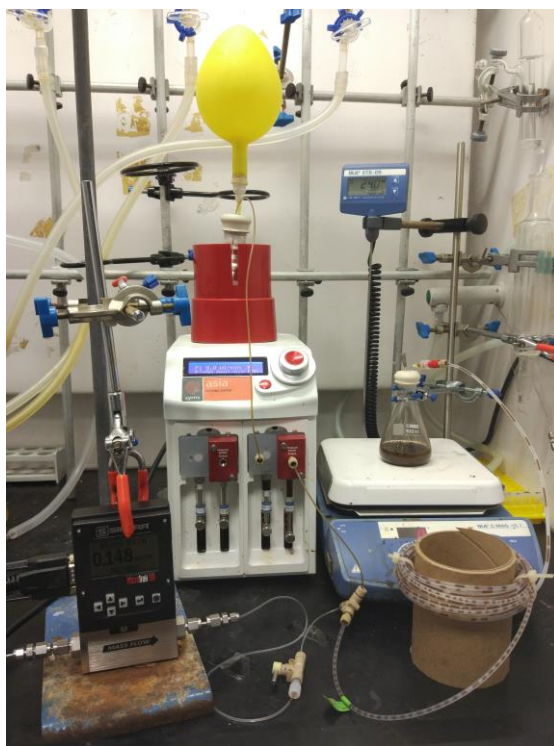

**Figure S16.** Continuous-flow setup for Sonogashira coupling with acetylene.

#### **General Procedure:**

The acetylene tank is pressurized to ~30 psi. A flame dried 200 mL round bottom flask was equipped with a rubber septum and magnetic stir bar and was charged with 4-iodoanisole (2.32 g, 10 mmol),  $\text{Pd}(\text{PPh}_3)_2\text{Cl}_2$  (351 mg, 0.5 mmol, 5 mol%), copper(I) iodide (38 mg, 0.2 mmol, 2 mol%), DIPEA (3.1 mL, 18 mmol, 1.8 equiv) and 1,3,5-

trimethoxybenzene (840 mg, 5 mmol, 0.5 equiv) in DMSO (100 mL). The mixture was vacuum degassed before DIPEA was added and protected under argon. As shown in Figure S16, an Asia pump was filled with the starting material solution and then attached to the flow system. The tubing reactor (HPFA, O.D. 1/8", I.D. 0.062", 900 cm, volume = 17.53 mL) was placed at r.t. The flow apparatus itself was set up as flow rate = 50  $\mu$ L/min,  $t_R$  approximate 2 h and flow of acetylene was controlled by mass flow controller to adjust to create 1:1 liquid/gas plugs. After approximately 4 h for equilibration, the solution was collected for 25 h, and quenched with saturated  $\text{NH}_4\text{Cl}$  aqueous solution (300 mL) and extracted with diethyl ether (100 mL x 4). After separation, the organic phase was collected to check GC yields, which indicated **2a** of 97% yield, and **3a** of 3% yield (1,3,5-trimethoxybenzene as the internal standard). The combined organic layers were dried with  $\text{Na}_2\text{SO}_4$ . After filtration and evaporation under vacuum at 0  $^\circ\text{C}$ , the crude residue was purified by flash chromatography (eluent: pentane), which afforded 797 mg products, in 81% yield.

#### 6.4 One-pot Sonogashira coupling of bromoanisole with acetylene

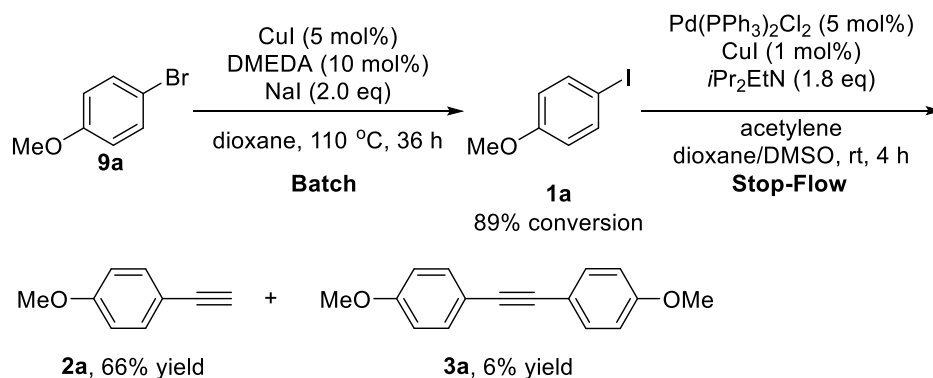

#### General Procedure<sup>[9]</sup>

Under  $\text{N}_2$  atmosphere, in a sealed tube, a solution of 4-bromoanisole **9a** (561 mg, 3.0 mmol, 1.0 eq),  $\text{CuI}$  (28.5 mg, 0.15 mmol, 5 mol%),  $N,N'$ -dimethylethylenediamine (DMEDA) (26.4 mg, 0.3 mmol, 10 mol%),  $\text{NaI}$  (899 mg, 0.6 mmol, 2.0 eq), 1,3,5-trimethoxybenzene (252 mg, 1.5 mmol, 0.5 eq) in dry dioxane (3.0 mL) was stirred at 110  $^\circ\text{C}$  for 36 h. After cooling to rt, taking the supernatant for analyzing and using for the

next step directly. The  $^1\text{H}$  NMR analysis of the crude mixture indicated an 89% conversion.

In a flame dried 10 mL round bottom flask, the supernatant solution (0.8 mL, containing 4-iodoanisole (129 mg, 0.55 mmol, 1.0 eq) and 1,3,5-trimethoxybenzene (70 mg, 0.41 mmol, 0.75 eq) was added to a solution of  $\text{Pd}(\text{PPh}_3)_2\text{Cl}_2$  (19.3 mg, 0.0275 mmol, 5 mol%),  $\text{CuI}$  (1.1 mg, 0.0055 mmol, 1 mol%) and  $\text{DIPEA}$  (176  $\mu\text{L}$ , 0.99 mmol, 1.8 eq) in  $\text{DMSO}$  (2.0 mL). The mixture was bubbled with argon for 15 min. The acetylene tank was pressurized to  $\sim 20$  psi higher than the desired back-pressure (5 psi) of the system. A stainless steel syringe was filled with the solution and then attached to the SFMT system. The stop-flow micro tubing reactor was made of HPFA tubing (O.D. 1/16", I.D. 0.03", 300 cm, volume = 1.37 mL). The flow apparatus itself was set up with a flow rate = 300  $\mu\text{L}/\text{min}$ , and flow of acetylene was adjusted to create  $\sim 1:1$  liquid/gas plugs. After approximately 2 min equilibration, the valves were closed, and the tubing was held at r.t. and kept for 4 h. Then the reaction mixture was washed out with  $\text{DMSO}$  (0.5 mL) and diethyl ether (1.5 mL) and quenched with saturated  $\text{NH}_4\text{Cl}$  aqueous solution (4.0 mL). After separation, the organic phase was collected for GC analysis, which indicated **2a** of 66% yield and **3a** of 6% yield (1,3,5-trimethoxybenzene as the internal standard).

### 6.5 New compound characterization

#### **General method of GC yield calculation**

According to GC spectrum of reaction product, we used calibration curve to calculate the GC yield. From the calibration curve, we derived a linear regression equation,

$$y = ax + b.$$

In this equation,

$$y = \frac{(\textit{integration of the product})}{(\textit{integration of internal standard})}$$

$$x = \textit{mass of the product (mg)}$$

Here is an example of calculation yield of main product **2a** and side product **3a**. From Figure S19, we know that  $y_{2a} = 100\%/98.25\% = 1.018$ ,  $y_{3a} = 19.57\%/98.25\% = 0.199$ . So  $x_{2a} = 31.78$  mg and  $x_{3a} = 1.19$  mg.

Therefore, the  $\text{yield}_{2a} = 31.78/33.04 = 96\%$  and  $\text{yield}_{3a} = 1.19/29.79 = 4\%$ .

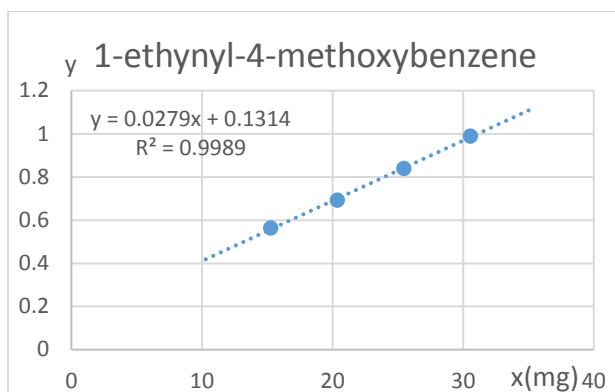

Figure S17. Calibration curve of main product

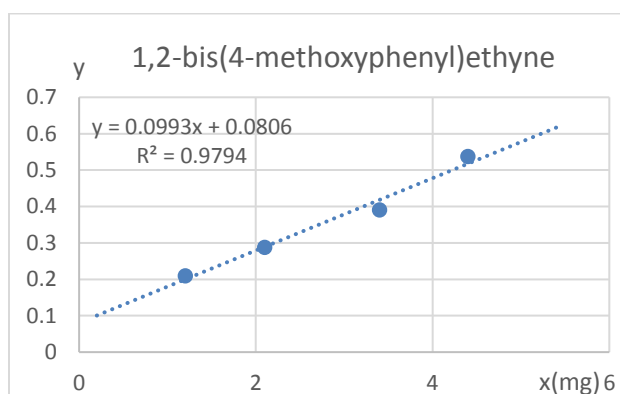

Figure S18. Calibration curve of the byproduct

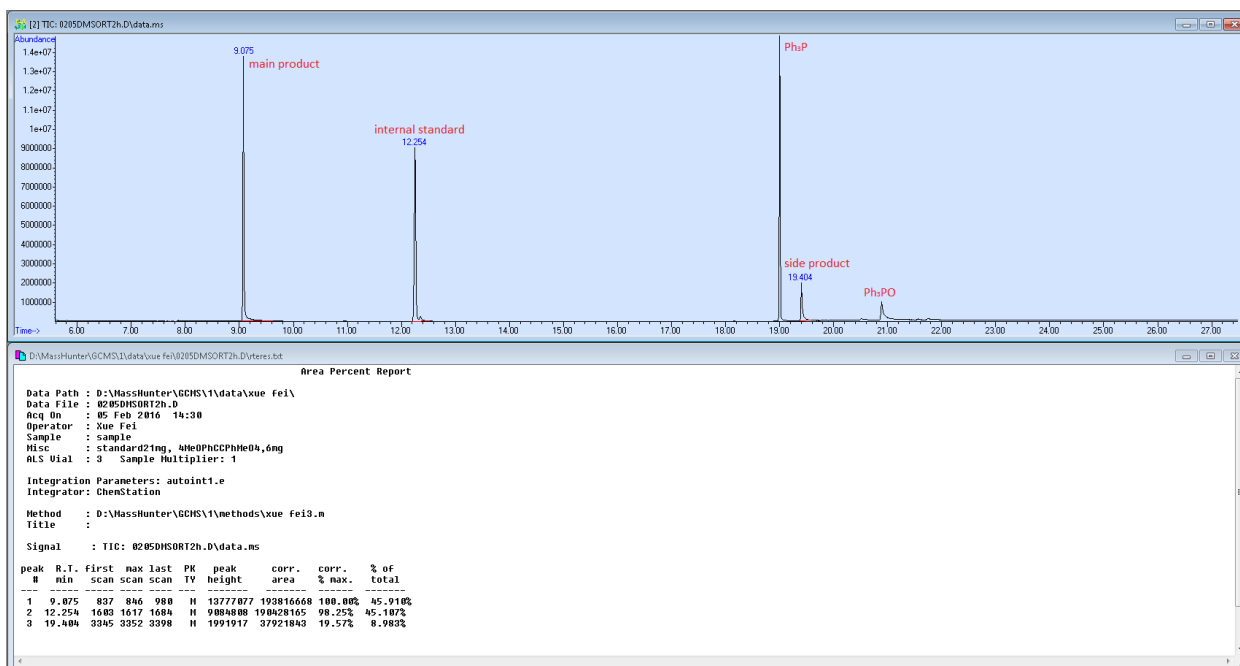

Figure S19. GC Spectrum

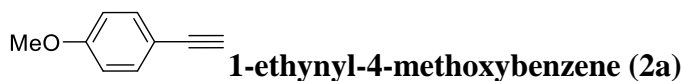

*Batch:* Followed the general procedure **A** in batch reaction with 4-iodoanisole (234.0 mg, 1.00 mmol) at rt. The GC analysis of the crude mixture indicated **2a** of 45% yield with **3a** 14% yield.

*Stop-flow:* Followed the general procedure **B** in SFMT reactors with 4-iodoanisole (58.5 mg, 0.25 mmol) at rt. The GC analysis of the crude mixture indicated **2a** of 96% yield together with 4% of **3a**. <sup>1</sup>H NMR (400 MHz, CDCl<sub>3</sub>) δ 7.44 (d, *J* = 9.2 Hz, 2H), 6.85 (d, *J* = 9.2 Hz, 2H), 3.80 (s, 3H), 3.01 (s, 1H).

Characterization of compound **2a** has been reported in previous literature.<sup>[10]</sup>

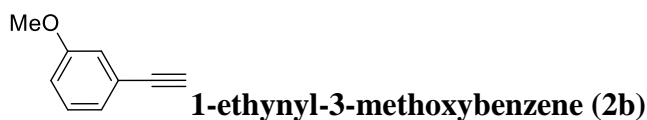

Followed the general procedure **B** in SFMT with 3-iodoanisole (58.5 mg, 0.25 mmol) at rt. The GC analysis of the crude mixture indicated **2b** of 97% yield together with **3b** of 2% yield.

Characterization of compound **2b** has been reported in previous literature.<sup>[11]</sup>

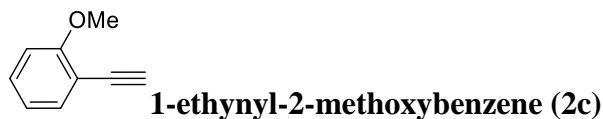

Followed the general procedure **B** in SFMT with 2-iodoanisole (58.5 mg, 0.25 mmol) at 60 °C. The GC analysis of the crude mixture indicated **2c** of 47% yield together with **3c** of 2% yield.

Characterization of compound **2c** has been reported in previous literature.<sup>[12]</sup>

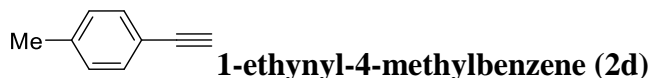

Followed the general procedure **B** in SFMT with 1-iodo-4-methylbenzene (57.0 mg, 0.25 mmol) at rt. The GC analysis of the crude mixture indicated **2d** of 75% yield together with **3d** of 3% yield.



Characterization of compound **2d** has been reported in previous literature.<sup>[10]</sup>

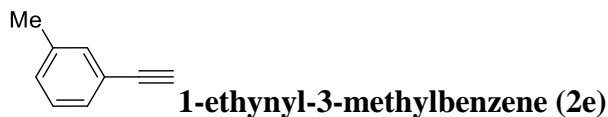

Followed the general procedure **B** in SFMT with 1-iodo-3-methylbenzene (57.0 mg, 0.25 mmol) at rt. The GC analysis of the crude mixture indicated **2e** of 86% yield together with **3e** of 5% yield.

Characterization of compound **2e** has been reported in previous literature.<sup>[13]</sup>

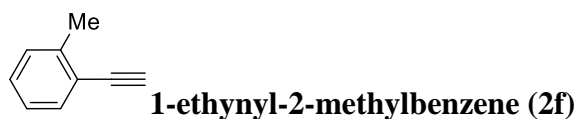

Followed the general procedure **B** in SFMT with 1-iodo-2-methylbenzene (57.0 mg, 0.25 mmol) at 60 °C. The GC analysis of the crude mixture indicated **2f** of 48% yield together with **3f** of 2% yield.

Characterization of compound **2f** has been reported in previous literature.<sup>[13]</sup>

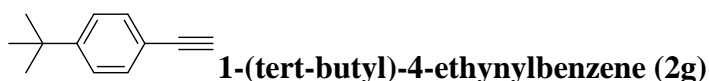

Followed the general procedure **B** in SFMT with 1-(tert-butyl)-4-iodobenzene (65.0 mg, 0.25 mmol) at rt. The GC analysis of the crude mixture indicated **2g** of 80% yield together with **3g** of 6% yield.

Characterization of compound **2g** has been reported in previous literature.<sup>[14]</sup>

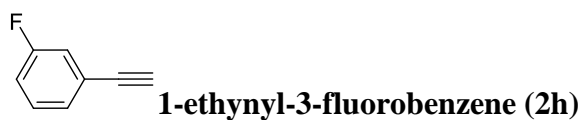

Followed the general procedure **B** in SFMT with 1-fluoro-3-iodobenzene (55.5 mg, 0.25 mmol) at rt. The GC analysis of the crude mixture indicated **2h** of 68% yield together with **3h** of 3% yield.

Characterization of compound **2h** has been reported in previous literature.<sup>[15]</sup>

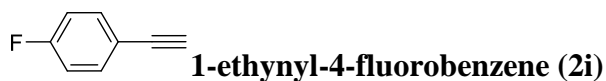

*Stop-flow:* Followed the general procedure **B** in SFMT with 1-fluoro-4-iodobenzene (55.5 mg, 0.25 mmol) at rt. The GC analysis of the crude mixture indicated **2i** of 70% yield together with **3i** of 3% yield.

*Continuous-flow:* Followed the general procedure **C** in continuous-flow with 1-fluoro-4-iodobenzene (166.5 mg, 0.75 mmol). GC analysis of the crude mixture indicated **2i** of 62% yield together with **3i** of 5% yield.

Characterization of compound **2i** has been reported in previous literature.<sup>[13]</sup>

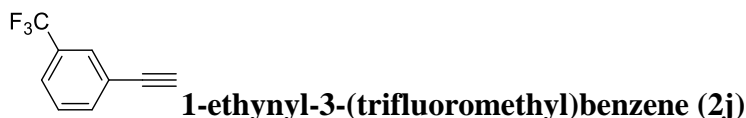

Followed the general procedure **B** in SFMT with 1-iodo-3-(trifluoromethyl)benzene (68.0 mg, 0.25 mmol) at rt. The GC analysis of the crude mixture indicated **2j** of 67% yield together with **3j** of 5% yield.

Characterization of compound **2j** has been reported in previous literature.<sup>[15]</sup>

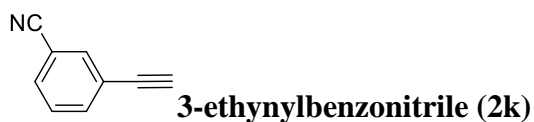

Followed the general procedure **B** in SFMT with 1-iodobenzonitrile (57.3 mg, 0.25 mmol) at rt. The GC analysis of the crude mixture indicated **2k** of 80% yield together with **3k** of 10% yield.

Characterization of compound **2k** has been reported in previous literature.<sup>[16]</sup>

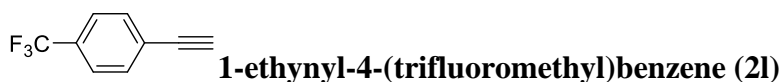

*Stop-flow:* Followed the general procedure **B** in SFMT with 1-iodo-4-(trifluoromethyl)benzene (68.0 mg, 0.25 mmol) at rt. The GC analysis of the crude mixture indicated **2l** of 70% yield together with **3l** of 6% yield.

*Continuous-flow*: Followed the general procedure **C** in continuous-flow with 1-iodo-4-(trifluoromethyl)benzene (204.0 mg, 0.75 mmol). GC analysis of the crude mixture indicated **2l** of 85% yield together with **3l** of 5% yield.

Characterization of compound **2l** has been reported in previous literature.<sup>[15]</sup>

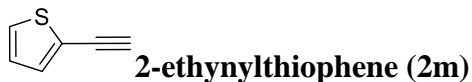

Followed the general procedure **B** in SFMT with 2-iodothiophene (52.0 mg, 0.25 mmol) at rt. The GC analysis of the crude mixture indicated **2m** of 65% yield together with **3m** of 3% yield.

Characterization of compound **2m** has been reported in previous literature.<sup>[17]</sup>

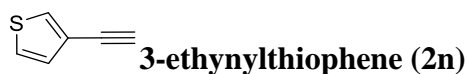

Followed the general procedure **B** in SFMT with 3-iodothiophene (52.0 mg, 0.25 mmol) at rt. The GC analysis of the crude mixture indicated **2n** of 83% yield together with **3n** of 2% yield.

Characterization of compound **2n** has been reported in previous literature.<sup>[12]</sup>

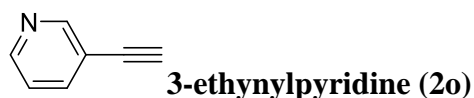

*Stop-flow*: Followed the general procedure **B** in SFMT with 3-iodopyridine (51.3 mg, 0.25 mmol) at rt. The GC analysis of the crude mixture indicated **2o** of 86% yield together with **3o** of 6% yield.

*Continuous-flow*: Followed the general procedure **C** in continuous-flow with 3-iodopyridine (153.8 mg, 0.75 mmol). GC analysis of the crude mixture indicated **2o** of 90% yield together with **3o** of 4% yield.

Characterization of compound **2o** has been reported in previous literature.<sup>[10]</sup>

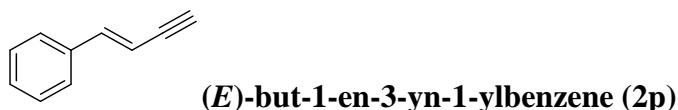

Followed the general procedure **B** in SFMT with trans- $\beta$ -bromostyrene (45.8 mg, 0.25 mmol), Pd(PPh<sub>3</sub>)<sub>2</sub>Cl<sub>2</sub> (17 mg, 0.025 mmol, 10 mol%) at rt for 4 h. The GC analysis of the crude mixture indicated **2p** of 79% yield together with **3p** of 2% yield.

Characterization of compound **2p** has been reported in previous literature.<sup>[18]</sup>

## 7. Fulvene Synthesis

### 7.1 Reaction optimization

Reaction optimization was carried out with the SFMT platform.

**Table S3.** Reaction optimization of fulvene synthesis (with selected data).

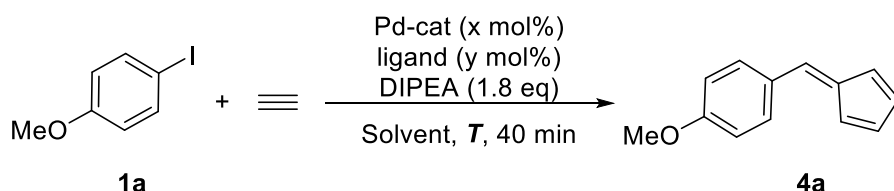

| Entry<br>[a]     | Catalyst (x mol%)                                            | Ligand (y mol%)                                                                                            | Solvent           | T [°C] | Yield<br>[%] <sup>[b]</sup> |
|------------------|--------------------------------------------------------------|------------------------------------------------------------------------------------------------------------|-------------------|--------|-----------------------------|
| 1                | Pd(PPh <sub>3</sub> ) <sub>2</sub> Cl <sub>2</sub> (5 mol%)  | -                                                                                                          | DMF               | 100    | 34                          |
| 2                | Pd(PPh <sub>3</sub> ) <sub>2</sub> Cl <sub>2</sub> (5 mol%)  | -                                                                                                          | DMF               | 120    | 42                          |
| 3                | Pd(PPh <sub>3</sub> ) <sub>2</sub> Cl <sub>2</sub> (5 mol%)  | -                                                                                                          | DMF               | 140    | 37                          |
| 4                | Pd(PPh <sub>3</sub> ) <sub>4</sub> (5 mol%)                  | -                                                                                                          | DMF               | 120    | 47                          |
| 5                | Pd(dba) <sub>2</sub> (5 mol%)                                | PPh <sub>3</sub> (10 mol%)                                                                                 | DMF               | 120    | 48                          |
| 6                | Pd(OAc) <sub>2</sub> (5 mol%)                                | PPh <sub>3</sub> (10 mol%)                                                                                 | DMF               | 120    | -                           |
| 7                | Pd(OAc) <sub>2</sub> (5 mol%)                                | dppe (10 mol%)                                                                                             | DMF               | 120    | -                           |
| 8                | Pd(CH <sub>3</sub> CN) <sub>2</sub> Cl <sub>2</sub> (5 mol%) | PPh <sub>3</sub> (10 mol%)                                                                                 | DMF               | 120    | 43                          |
| 9 <sup>[c]</sup> | Pd(dba) <sub>2</sub> (5 mol%)                                | PPh <sub>3</sub> (10 mol%)                                                                                 | DMF               | 120    | 45                          |
| 10               | Pd(dba) <sub>2</sub> (5 mol%)                                | PPh <sub>3</sub> (10 mol%)                                                                                 | DMSO              | 120    | 52                          |
| 11               | Pd(dba) <sub>2</sub> (5 mol%)                                | PPh <sub>3</sub> (10 mol%)                                                                                 | NMP               | 120    | 52                          |
| 12               | Pd(dba) <sub>2</sub> (5 mol%)                                | PPh <sub>3</sub> (10 mol%)                                                                                 | PhCF <sub>3</sub> | 120    | 21                          |
| 13               | Pd(dba) <sub>2</sub> (5 mol%)                                | PPh <sub>3</sub> (10 mol%)                                                                                 | Xylene            | 120    | 5                           |
| 14               | Pd(dba) <sub>2</sub> (5 mol%)                                | dppe (10 mol%)                                                                                             | DMSO              | 120    | -                           |
| 15               | Pd(dba) <sub>2</sub> (5 mol%)                                | dppp (10 mol%)                                                                                             | DMSO              | 120    | 52                          |
| 16               | Pd(dba) <sub>2</sub> (5 mol%)                                | dppb (10 mol%)                                                                                             | DMSO              | 120    | 57                          |
| 17               | Pd(dba) <sub>2</sub> (5 mol%)                                | dppf (10 mol%)                                                                                             | DMSO              | 120    | 49                          |
| 18               | Pd(dba) <sub>2</sub> (5 mol%)                                | Johnphos (10 mol%)                                                                                         | DMSO              | 120    | 51                          |
| 19               | Pd(dba) <sub>2</sub> (5 mol%)                                | Xantphos (10 mol%)                                                                                         | DMSO              | 120    | 52                          |
| 20               | Pd(dba) <sub>2</sub> (5 mol%)                                | 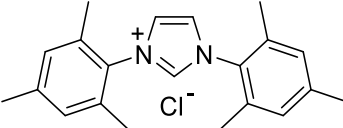<br>IMes-HCl (10 mol%) | DMSO              | 120    | 52                          |

|                   |                                     |                                                                                                         |             |            |           |
|-------------------|-------------------------------------|---------------------------------------------------------------------------------------------------------|-------------|------------|-----------|
| 21                | Pd(dba) <sub>2</sub> (5 mol%)       | 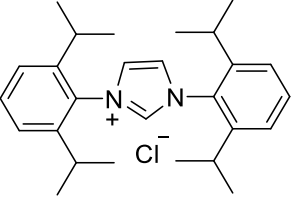<br>IPr-HCl (10 mol%) | DMSO        | 120        | 45        |
| 22                | Pd(dba) <sub>2</sub> (5 mol%)       | <br>IBn-HCl (10 mol%) | DMSO        | 120        | 60        |
| 23                | Pd(dba) <sub>2</sub> (5 mol%)       | <br>IBn-HBr (10 mol%) | DMSO        | 120        | 63        |
| 24                | Pd(dba) <sub>2</sub> (5 mol%)       | <br>(10 mol%)          | DMSO        | 120        | 60        |
| 25                | Pd(dba) <sub>2</sub> (2 mol%)       | IBn-HBr (4 mol%)                                                                                        | DMSO        | 120        | 65        |
| <b>26</b>         | <b>Pd(dba)<sub>2</sub> (1 mol%)</b> | <b>IBn-HBr (2 mol%)</b>                                                                                 | <b>DMSO</b> | <b>120</b> | <b>66</b> |
| 27 <sup>[d]</sup> | Pd(dba) <sub>2</sub> (1 mol%)       | IBn-HBr (2 mol%)                                                                                        | DMSO        | 120        | 62        |

[a] Reactions were carried out with **1a** (0.1 M). [b] Yields were determined by GC analysis with biphenyl as the internal standard. [c] Reaction was carried out for 2 h. [d] Reaction was carried out with **1a** (0.05 M).

## 7.2 General procedure for batch, SFMT, and continuous-flow reactions

### General procedure A for batch reactions

Under N<sub>2</sub> atmosphere, a solution of 4-Iodoanisole (57 mg, 0.25 mmol), Pd(dba)<sub>2</sub> (1.5 mg, 0.0025 mmol, 1 mol%), 1,3-bisbenzyl-imidazole bromide salt (1.6 mg, 0.005 mmol, 2 mol%), DIPEA (57 mg, 0.375 mmol, 1.8 equiv) and biphenyl (25 mg, 0.16 mmol) in DMSO (2.5 mL) was stirred at rt, and the solution was vacuumed and refilled with acetylene balloon. Then the reaction mixture was stirred at 120 °C for 40 mins. Subsequently, the mixture was cooled to rt. 1.0 mL of the solution was taken and quenched by distilled water (0.5 mL), extracted with ethyl acetate (1.0 mL), and the

organic phase was collected for GC analysis, which indicated the corresponding product **4a** in a 42% yield.

### **General procedure B for SFMT reactions**

The acetylene tank is pressurized to ~15 psi higher than the desired back-pressure (10 psi) of the system. A flame dried 10 mL round bottom flask was equipped with a rubber septum and magnetic stir bar and was charged with aryl iodide (0.25 mmol), Pd(dba)<sub>2</sub> (1.5 mg, 0.0025 mmol, 1 mol%), 1,3-bisbenzyl-imidazole bromide salt (1.6 mg, 0.005 mmol, 2 mol%), DIPEA (57 mg, 0.375 mmol, 1.8 equiv) and biphenyl (25 mg, 0.16 mmol) in DMSO (2.5 mL). The mixture was bubbled with Ar for 15 mins. An 8 mL, stainless steel Harvard Apparatus syringe was filled with the solution and then attached to the flow apparatus (syringe pump). The flow apparatus itself was set up at flow rate = 300  $\mu$ L/min, and flow of acetylene was adjusted to create ~1:1 liquid/gas plugs. After approximate 2 mins equilibration, valves were closed, and the tubing (stainless steel, 1/16", I.D. 0.03", 300 cm, volume = 1.37 mL) was placed into the oil bath at 120 °C for 40 mins. Then the mixture in the tubing reactor was cooled to rt, and was washed out using DMSO (3.0 mL). The reaction mixture was added to water and extracted with ethyl acetate. After separation, the organic phase was collected for GC analysis to check the product yield (biphenyl as the internal standard).

### **General procedure C for continuous-flow reactions**

The acetylene tank is pressurized to ~25 psi. A flame dried 10 mL round bottom flask was equipped with a rubber septum and magnetic stir bar and was charged with aryl iodide (1.0 mmol), Pd(dba)<sub>2</sub> (5.7 mg, 0.01 mmol, 1 mol%), 1,3-bisbenzyl-imidazole bromide salt (6.6 mg, 0.02 mmol, 2 mol%), DIPEA (228 mg, 1.8 mmol, 1.8 equiv) and biphenyl (100 mg, 0.64 mmol) in DMSO (5.0 mL). The mixture was bubbled with Ar for 15 mins. An 8 mL, stainless steel Harvard Apparatus syringe was filled with the solution and then attached to the continuous flow system. The tubing (stainless steel, SS-T4-S-035-6ME, O.D. 1/4", I.D. 4.57 mm, 20 cm) was packed with stainless steel powder and placed into the oil bath at 120 °C. The flow apparatus itself was set up as  $t_R$  = 40 mins, flow rate = 50  $\mu$ L/min, and flow of acetylene was adjusted to create 1:1 liquid/gas plugs.

After approximately 120 mins for equilibration, the solution was collected for 1 h. The reaction mixture was poured into water (2 mL) and extract with ethyl acetate (1.0 mL X 2). After separation, the organic phase was collected for GC analysis to check the yield (biphenyl as the internal standard).

### 7.3 Large-scale continuous production

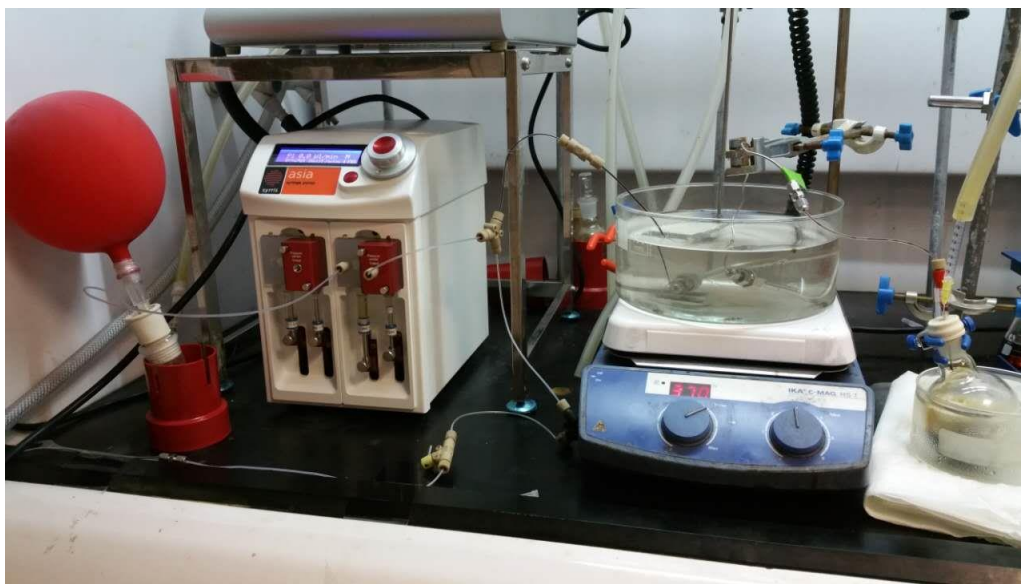

**Figure S20.** Continuous-flow setup for fulvene preparation.

The acetylene tank is pressurized to ~25 psi. A flame dried 250 mL round bottom flask was equipped with a rubber septum and magnetic stir bar and was charged with 4-iodoanisole (1.14 g, 5.0 mmol), Pd(dba)<sub>2</sub> (30 mg, 0.05 mmol, 1 mol%), 1,3-bisbenzylimidazole bromide salt (33 mg, 0.1 mmol, 2 mol%), DIPEA (1.16 g, 9 mmol, 1.8 equiv) and biphenyl (0.49 g, 3.2 mmol) in DMSO (50.0 mL). The mixture was bubbled with acetylene for 15 mins. The same solution was made twice. When the solution in RBF was nearly pumped empty, the fresh prepared solution was refilled to avoiding decomposition of Pd catalyst during their stay at room temperature. As shown in Figure S20, an Asia pump was filled with the solution and then attached to the flow apparatus (syringe pump). The tubing (stainless steel, SS-T4-S-035-6ME, O.D. 1/4", I.D. 4.57 mm, 20 cm) was packed with stainless steel powder and placed into the oil bath at 120 °C. The flow apparatus itself was set up with  $t_R = 40$  mins, flow rate = 50  $\mu\text{L}/\text{min}$ , and flow of

acetylene was adjusted to create 1:1 liquid/gas plugs. After approximately 120 mins of equilibration, the solution was collected for 36 h, quenched with distilled water (100 mL), and extracted by ether (150 mL x 3). The combined organic phase was dried with MgSO<sub>4</sub>. After evaporation with reduced pressure below 20 °C, the red residue was purified by flash chromatography (eluent: hexane), affording the red solid product 1.1 g, in 55% yield.

#### 7.4 New compound characterization

##### **Example of calibration of GC yields**

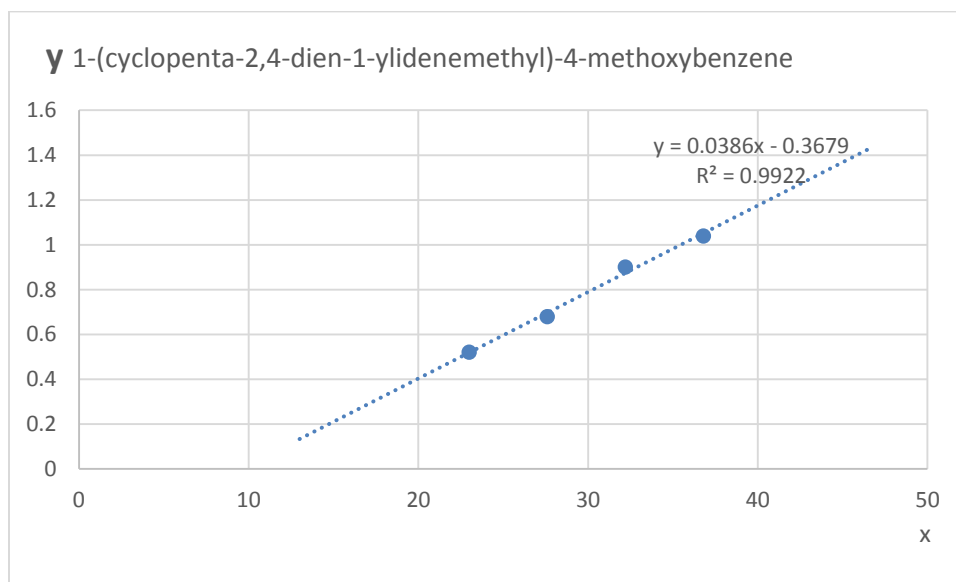

**Figure S21.** Calibration curve of 1-(cyclopenta-2,4-dien-1-ylidenemethyl)-4-methoxybenzene.



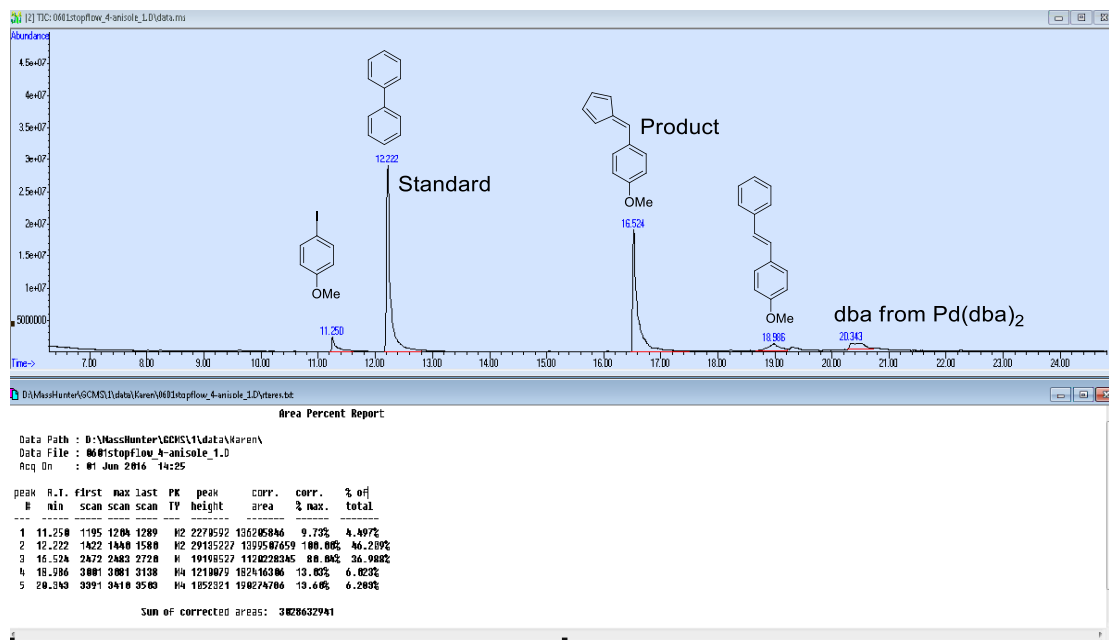

**Figure S22.** GC spectrum of the crude mixture.

Follow the same method as mention in Figure S19, based on Figure S22, it was calculated  $y_{4a} = 0.805$ ,  $x_{4a} = 30.4$ . Therefore, the yield of **4a** =  $30.4/46 = 66\%$ .

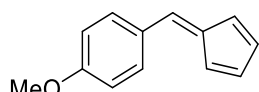

**1-(cyclopenta-2,4-dien-1-ylidene)methyl-4-methoxybenzene (4a)**

*Batch:* Followed the general procedure **A** in batch, obtained **4a** in 42% yield.

*Stop-flow :* Followed the general procedure **B** in SFMT reactors with 4-iodoanisole (58.5 mg, 0.25 mmol), GC analysis of the crude product mixture indicated a 66% yield of **4a**.

$^1\text{H}$  NMR ( $\text{CDCl}_3$ , 400 M)  $\delta$  7.60 (d,  $J = 8.8$  Hz, 2H), 7.18 (s, 1H), 6.86 (d,  $J = 8.8$  Hz, 2H), 6.76-6.75 (m, 1H), 6.70-6.68 (m, 1H), 6.52-6.50 (m, 1H), 6.36-6.34 (m, 1H), 3.86 (s, 3H).

Characterization data of compound **4a** have been reported in previous literature.<sup>[19]</sup>

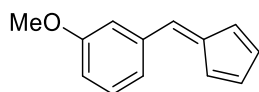

**1-(cyclopenta-2,4-dien-1-ylidene)methyl-3-methoxybenzene (4b)**

Followed the general procedure **B** in SFMT reactors with 3-iodoanisole (58.5 mg, 0.25 mmol), GC analysis of the crude product mixture indicated a 42% yield of **4b**.

Characterization data of compound **4b** have been reported in previous literature.<sup>[19]</sup>

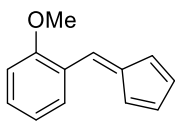

**1-(cyclopenta-2,4-dien-1-ylidene)methyl-2-methoxybenzene (4c)**

Followed the general procedure **B** in SFMT reactors with 2-iodoanisole (58.5 mg, 0.25 mmol), GC analysis of the crude product mixture indicated a 60% yield of **4c**.

Characterization data of compound **4c** have been reported in previous literature.<sup>[20]</sup>

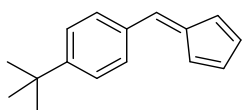

**1-(tert-butyl)-4-(cyclopenta-2,4-dien-1-ylidene)methylbenzene (4d)**

Followed the general procedure **B** in SFMT reactors with 1-iodo-4-(tert-butyl)benzene (65.0 mg, 0.25 mmol), GC analysis of the crude product mixture indicated a 56% yield of **4d**.

Characterization data of compound **4d** have been reported in previous literature.<sup>[21]</sup>

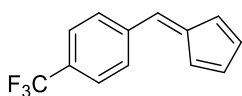

**1-(cyclopenta-2,4-dien-1-ylidene)methyl-4-(trifluoromethyl)benzene (4e)**

Followed the general procedure **B** in SFMT reactors with 1-iodo-4-(trifluoromethyl)benzene (68.0 mg, 0.25 mmol), GC analysis of the crude product mixture indicated a 40% yield of **4e**.

Characterization data of compound **4e** have been reported in previous literature.<sup>[19]</sup>

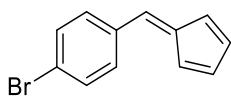

**1-(cyclopenta-2,4-dien-1-ylidene)methyl-4-bromobenzene (4f)**

Followed the general procedure **B** in SFMT reactors with 1-bromo-4-iodobenzene (70.7 mg, 0.25 mmol), GC analysis of the crude product mixture indicated a 62% yield of **4f**.

<sup>1</sup>H NMR (CDCl<sub>3</sub>, 400 M) δ 7.55 (d, *J* = 8.4 Hz, 2H), 7.44 (d, *J* = 8.8 Hz, 2H), 7.12 (s, 1H), 6.70-6.68 (m, 1H), 6.64-6.62 (m, 1H), 6.54-6.52 (m, 1H), 6.32-6.30 (m, 1H); <sup>13</sup>C NMR (CDCl<sub>3</sub>, 100 M) δ 145.8, 136.5, 135.9, 135.7, 132.0, 131.9, 131.2, 127.1, 123.5, 120.0. GC/MS (m/z, relative intensity) : 232 (M<sup>+</sup>, 25), 153 (100).

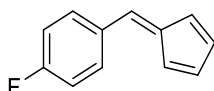

**1-(cyclopenta-2,4-dien-1-ylidene)methyl-4-fluorobenzene (4g)**

Followed the general procedure **B** in SFMT reactors with 1-fluoro-4-iodobenzene (70.7 mg, 0.25 mmol), GC analysis of the crude product mixture indicated a 50% yield of **4g**. Characterization data of compound **4g** have been reported in previous literature.<sup>[19]</sup>

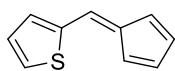

**2-(cyclopenta-2,4-dien-1-ylidene)methylthiophene (4h)**

Followed the general procedure **B** in SFMT reactors with 2-iodothiophene (52.5 mg, 0.25 mmol), GC analysis of the crude product mixture indicated a 48% yield of **4h**. Characterization data of compound **4h** have been reported in previous literature.<sup>[22]</sup>

## 8. Visible-Light Promoted Synthesis of Styrene Derivatives Using Acetylene

### 8.1 SFMT Reactor Setup

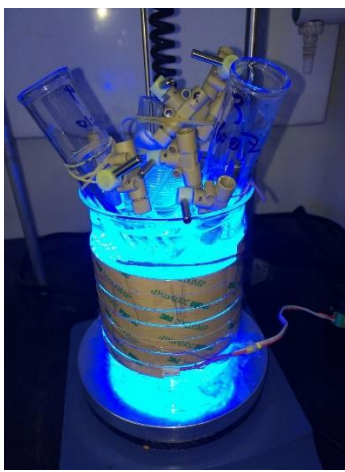

**Figure S23.** Stop-flow setup for fluorinated styrene screening and preparation.

### 8.2 Reaction optimization

**Table S4.** Reaction optimization of synthesis of styrene derivatives (catalyst, base and solvent screening).

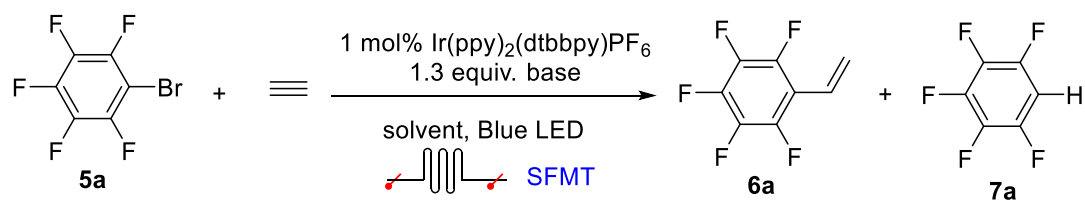

| Entry | Catalyst                                                         | Base                         | Solvent            | Conversion [%] <sup>[a]</sup> | Ratio (6a:7a) <sup>[a]</sup> |
|-------|------------------------------------------------------------------|------------------------------|--------------------|-------------------------------|------------------------------|
| 1     | Ir(ppy) <sub>2</sub> (dtbbpy)PF <sub>6</sub>                     | <i>i</i> Pr <sub>2</sub> EtN | CH <sub>3</sub> CN | 94                            | 1.8 : 1                      |
| 2     | Ir(ppy) <sub>3</sub>                                             | <i>i</i> Pr <sub>2</sub> EtN | CH <sub>3</sub> CN | 69                            | 1.8 : 1                      |
| 3     | Ir(dF-CF <sub>3</sub> -ppy) <sub>2</sub> (dtbbpy)PF <sub>6</sub> | <i>i</i> Pr <sub>2</sub> EtN | CH <sub>3</sub> CN | 73                            | 1.6 : 1                      |
| 4     | Ru(bpy) <sub>3</sub> Cl <sub>2</sub>                             | <i>i</i> Pr <sub>2</sub> EtN | CH <sub>3</sub> CN | 51                            | 1.4 : 1                      |
| 5     | eosin Y                                                          | <i>i</i> Pr <sub>2</sub> EtN | CH <sub>3</sub> CN | 55                            | 1.4 : 1                      |
| 6     | [Acr <sup>+</sup> -Mes]ClO <sub>4</sub> <sup>-</sup>             | <i>i</i> Pr <sub>2</sub> EtN | CH <sub>3</sub> CN | 0                             | -                            |
| 7     | Ir(ppy) <sub>2</sub> (dtbbpy)PF <sub>6</sub>                     | Et <sub>3</sub> N            | CH <sub>3</sub> CN | 80                            | 1 : 1                        |
| 8     | Ir(ppy) <sub>2</sub> (dtbbpy)PF <sub>6</sub>                     | DBU                          | CH <sub>3</sub> CN | 62                            | 1 : 4.2                      |
| 9     | Ir(ppy) <sub>2</sub> (dtbbpy)PF <sub>6</sub>                     | DMEDA                        | CH <sub>3</sub> CN | 92                            | 1 : 2.1                      |
| 10    | Ir(ppy) <sub>2</sub> (dtbbpy)PF <sub>6</sub>                     | Bu <sub>3</sub> N            | CH <sub>3</sub> CN | 100                           | 1 : 11                       |
| 11    | Ir(ppy) <sub>2</sub> (dtbbpy)PF <sub>6</sub>                     | TMEDA                        | CH <sub>3</sub> CN | 100                           | 1 : 20.5                     |
| 12    | Ir(ppy) <sub>2</sub> (dtbbpy)PF <sub>6</sub>                     | DABCO                        | CH <sub>3</sub> CN | 23                            | 1 : 4.8                      |
| 13    | Ir(ppy) <sub>2</sub> (dtbbpy)PF <sub>6</sub>                     | <i>t</i> Butylamine          | CH <sub>3</sub> CN | 0                             | -                            |
| 14    | Ir(ppy) <sub>2</sub> (dtbbpy)PF <sub>6</sub>                     | <i>i</i> Pr <sub>2</sub> EtN | THF                | 100                           | 0 : 1                        |
| 15    | Ir(ppy) <sub>2</sub> (dtbbpy)PF <sub>6</sub>                     | <i>i</i> Pr <sub>2</sub> EtN | DMF                | 100                           | 0 : 1                        |

[a] Conversions and ratios were determined based on <sup>19</sup>F NMR analysis of the crude product mixtures.

**Table S5.** Reaction optimization of synthesis of styrene derivatives (with TEMPO)

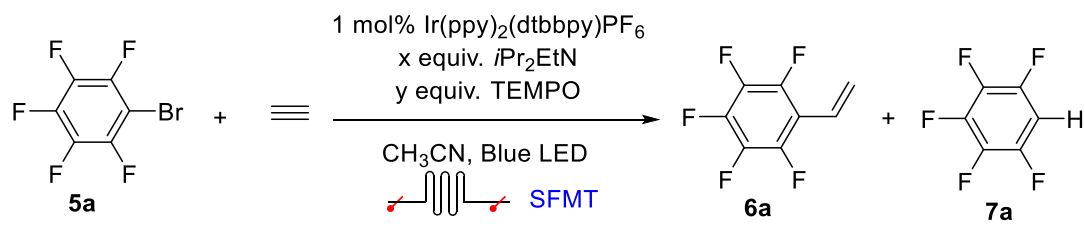

| Entry            | TEMPO [y] | <i>i</i> Pr <sub>2</sub> NEt [x] | t [h] | <i>T</i> [°C] | Conversion [%] <sup>[a]</sup> | Ratio [6a:7a] <sup>[a]</sup> |
|------------------|-----------|----------------------------------|-------|---------------|-------------------------------|------------------------------|
| 1                | 1.0       | 1.3                              | 3     | 50            | 80                            | 3.2 : 1                      |
| 2 <sup>[b]</sup> | 1.0       | 1.3                              | 3     | 50            | 44                            | 2.8 : 1                      |
| 3                | 1.0       | 1.3                              | 1     | 60            | 74                            | 3.8 : 1                      |
| 4                | 1.0       | 1.3                              | 3     | 60            | 93                            | 3.2 : 1                      |
| 5                | 0.2       | 1.3                              | 3     | 60            | 100                           | 4 : 5                        |
| 6                | 0.5       | 1.3                              | 3     | 60            | 100                           | 1.6 : 1                      |
| 7                | 1.2       | 1.3                              | 3     | 60            | 78                            | 3 : 1                        |
| 8                | 2.0       | 1.3                              | 3     | 60            | 23                            | 2.3 : 1                      |
| 9                | 1.0       | 1.5                              | 3     | 60            | 100                           | 1.9 : 1                      |

|                         |            |            |          |           |           |                |
|-------------------------|------------|------------|----------|-----------|-----------|----------------|
| 10                      | 1.0        | 2.0        | 3        | 60        | 100       | 1 : 5          |
| <b>11<sup>[c]</sup></b> | <b>1.0</b> | <b>1.3</b> | <b>3</b> | <b>60</b> | <b>97</b> | <b>3.6 : 1</b> |

[a] Conversions and ratios were determined based on <sup>19</sup>F NMR analysis of the crude product mixtures. [b] Without degassing. [c] with 20 Psi BPR.

### 8.3 General procedure for batch, and SFMT reactions

#### **General procedure A for batch reaction.**

Under Argon atmosphere, a solution of bromopentafluorobenzene (31.2  $\mu$ L, 0.25 mmol), Ir(ppy)<sub>2</sub>(dtbbpy)PF<sub>6</sub> (2.3 mg, 0.0025 mmol, 1 mol%), TEMPO (39.0 mg, 0.25 mmol) and DIPEA (56.0  $\mu$ L, 0.325 mmol, 1.3 equiv) with CH<sub>3</sub>CN (2.5 mL) were introduced into a 15 mL-Schlenk tube equipped with a magnetic stir bar. The mixtures were bubbled with argon balloon and acetylene balloon carefully in an ice-water bath for 10 and 2 minutes respectively, and then placed in a water bath with acetylene balloon for 3 h at 60 °C under a blue LED source. The residue was then diluted with CDCl<sub>3</sub>, and directly analyzed by GC-MS and <sup>19</sup>F NMR.

#### **General procedure B for SFMT reaction.**

Under Argon atmosphere, a solution of fluorinated aryl bromide **5** (0.30 mmol), Ir(ppy)<sub>2</sub>(dtbbpy)PF<sub>6</sub> (2.8 mg, 0.003 mmol, 1 mol%) and TEMPO (46.8 mg, 0.30 mmol) with CH<sub>3</sub>CN (3.0 mL) were introduced into a 10 mL silicon septa vial. The mixtures were bubbled with argon balloon carefully in an ice-water bath for 10 minutes. DIPEA (56.0  $\mu$ L, 0.325 mmol, 1.3 equiv) was then added into the mixture via Argon bubbling for another 5 minutes. An 8 mL, stainless steel Harvard Apparatus syringe was filled with the solution and then attached to the flow apparatus (syringe pump). The acetylene tank is pressurized to ~10 psi higher than the desired back-pressure (20 psi) of the system. The flow apparatus itself was set up at flow rate = 100  $\mu$ L/min, and flow of acetylene was adjusted to create around 2:1 gas/liquid plugs. After approximate 3 minutes, both shut-off valves were closed, and the stop-flow micro tubing reactor (total volume 0.65 mL, 0.065 mmol) which was made of HPFA tubing (O.D. 1/16", I.D. 0.03", 300 cm, volume = 1.37 mL) was placed under a blue LED source in the water bath at 60 °C for 3 h. The same procedure was applied for three other micro tubing reactors. Then the mixtures of four stop-flow micro tubing reactors (total volume 2.6 mL, 0.26 mmol) were combined

together. The solvent was carefully removed under reduced pressure due to volatile of products, and the residue was firstly purified by flash column chromatography on silica gel, and then further purified by GPC (Gel Permeation Chromatography).

#### 8.4 New compound characterization

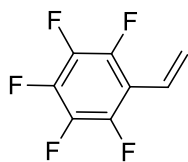

**Compound 2,3,4,5,6-Pentafluorostyrene (6a):** Prepared according to procedure B for SFMT reactions: (35 mg, 70% yield). Characterization of compound **6a** has been reported in previous literature.<sup>[23]</sup>

Notes: Carefully removed the solvent due to the volatility of **6a**.

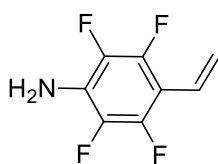

**Compound 2,3,5,6-tetrafluoro-4-vinylaniline (6b):** Prepared according to procedure B for SFMT reactions: (26 mg, 52% yield). <sup>1</sup>H NMR (400 MHz, CDCl<sub>3</sub>) δ 6.59 (dd, *J* = 18.0, 12.0 Hz, 1H), 5.91 (d, *J* = 18.0 Hz, 1H), 5.49 (d, *J* = 12.0 Hz, 1H), 4.01 (bs, 2H); <sup>19</sup>F NMR (376 MHz, CDCl<sub>3</sub>) δ -146.28 – -146.37 (m, 2F), -163.17 – -163.26 (m, 2F). <sup>13</sup>C NMR (125 MHz, CDCl<sub>3</sub>) δ 145.08 (dddd, *J* = 245.0, 11.9, 8.3, 3.6 Hz), 136.59 (dddd, *J* = 236.2, 9.4, 5.6, 3.9 Hz), 125.06 (tt, *J* = 14.4, 3.7 Hz), 122.49 (t, *J* = 2.0 Hz), 119.67 (t, *J* = 7.7 Hz), 104.96 (t, *J* = 13.8 Hz). HRMS (ESI) *m/z* calcd for C<sub>8</sub>H<sub>4</sub>F<sub>4</sub>N [M - H]<sup>-</sup> 190.0258, found: 190.0289.

Notes: Carefully removed the solvent due to the volatility of **6b**.

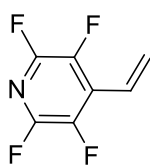

**Compound 2,3,5,6-tetrafluoro-4-vinylpyridine (6c):** Prepared according to procedure B for SFMT reactions: (22 mg, 48% yield). Characterization of compound **6c** has been reported in previous literature.<sup>[24]</sup>

Notes: Carefully removed the solvent due to the volatility of **6c**.

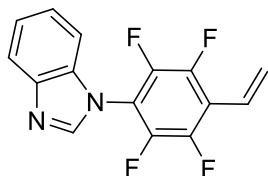

**Compound 1-(2,3,5,6-tetrafluoro-4-vinylphenyl)-1H-benzo[d]imidazole (6d):** Prepared according to procedure B for SFMT reactions: (46 mg, 61% yield). <sup>1</sup>H NMR (400 MHz, CDCl<sub>3</sub>) δ 8.03 (s, 1H), 8.02-7.88 (m, 1H), 7.41-7.35 (m, 2H), 7.28-7.25 (m, 1H), 6.76 (dd, *J* = 18.0, 12.0 Hz, 1H), 6.24 (d, *J* = 18.0 Hz, 1H), 5.85 (d, *J* = 12.0 Hz,

1H). <sup>19</sup>F NMR (376 MHz, CDCl<sub>3</sub>) δ -141.70 – -146.80 (m, 2F), -147.11 – -147.21 (m, 2F). <sup>13</sup>C NMR (125 MHz, CDCl<sub>3</sub>) δ 145.05 (dddd, *J* = 250.5, 12.4, 7.2, 3.2 Hz), 143.10, 142.36, 142.28 (ddt, *J* = 251.3, 15.5, 4.0 Hz), 133.37, 125.30 (t, *J* = 7.9 Hz), 124.46, 123.48, 121.63, 120.80, 117.39 (t, *J* = 13.6 Hz), 113.83 (tt, *J* = 14.4, 2.6 Hz), 110.4. HRMS (ESI) *m/z* calcd for C<sub>15</sub>H<sub>9</sub>F<sub>4</sub>N [M + H]<sup>+</sup>, 293.0696, found: 293.0700.

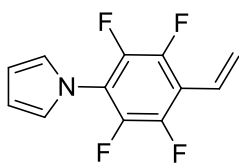

**Compound 1-(2,3,5,6-tetrafluoro-4-vinylphenyl)-1H-pyrrole**

**(6e):** Prepared according to procedure B for SFMT reactions: (39.5 mg, 63% yield). <sup>1</sup>H NMR (400 MHz, CDCl<sub>3</sub>) δ 6.96 (q, *J* = 2.0, 2H), 6.72 (dd, *J* = 18.0, 12.0 Hz, 1H), 6.42 (t, *J* = 2.0 Hz, 2H), 6.16 (d, *J* = 18.0 Hz, 1H), 5.76 (d, *J* = 12.0 Hz, 1H). <sup>19</sup>F NMR (376 MHz, CDCl<sub>3</sub>) δ -143.22 – -143.31 (m, 2F), -151.10 – -151.19 (m, 2F). <sup>13</sup>C NMR (125 MHz, CDCl<sub>3</sub>) δ 145.16 (dddd, *J* = 248.7, 12.6, 7.6, 4.3 Hz), 141.40 (ddt, *J* = 248.0, 15.7, 3.4 Hz), 123.94 (t, *J* = 7.8 Hz), 122.31, 121.85, 119.13 (t, *J* = 12.8 Hz), 114.59 (t, *J* = 13.7 Hz), 110.60. HRMS (APCI) *m/z* calcd for C<sub>12</sub>H<sub>7</sub>F<sub>4</sub>N 241.0509, found: 241.0506.

Notes: Carefully removed the solvent due to the volatility of **6e**.

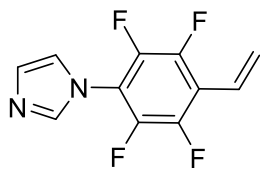

**Compound 1-(2,3,5,6-tetrafluoro-4-vinylphenyl)-1H-imidazole**

**(6f):** Prepared according to procedure B for SFMT reactions: (41 mg, 65% yield). <sup>1</sup>H NMR (500 MHz, CDCl<sub>3</sub>) δ 7.81 (s, 1H), 7.30-7.26 (m, 2H), 6.71 (dd, *J* = 18.0, 12.0 Hz, 1H), 6.19 (d, *J* = 18.0 Hz, 1H), 5.81 (d, *J* = 12.0 Hz, 1H), 1.88 (s, 1H). <sup>19</sup>F NMR (376 MHz, CDCl<sub>3</sub>) δ -141.99 – -142.09 (m, 2F), -149.92 – -150.02 (m, 2F). <sup>13</sup>C NMR (125 MHz, CDCl<sub>3</sub>) δ 145.05 (dddd, *J* = 250.4, 12.5, 7.2, 4.3 Hz), 141.12 (dddd, *J* = 249.6, 7.0, 4.1, 2.9 Hz), 137.67, 130.06, 125.02 (t, *J* = 7.9 Hz), 121.54, 120.01, 116.36 (t, *J* = 13.6 Hz), 115.40 (t, *J* = 12.7 Hz). HRMS (ESI) *m/z* calcd for C<sub>11</sub>H<sub>7</sub>F<sub>4</sub>N [M + H]<sup>+</sup>, 243.0540, found: 243.0543.

Notes: Compound of **6f** is easy to isomerize under acidic conditions.

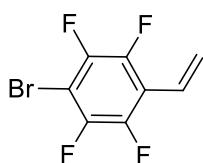

**Compound 4-Bromo-2,3,5,6-tetrafluorostyrene (6g):** Prepared according to procedure B for SFMT reaction: (34 mg, 51% yield). Characterization of compound **6g** has been reported in previous

literature.<sup>[25]</sup>

Notes: Carefully removed the solvent due to the volatility of **6g**.

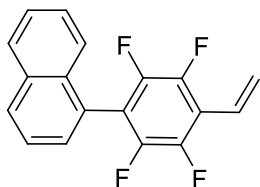

**Compound 1-(2,3,5,6-tetrafluoro-4-vinylphenyl)naphthalene**

**(6h):** Prepared according to procedure B for SFMT reactions: (35

mg, 45% yield). <sup>1</sup>H NMR (500 MHz, CDCl<sub>3</sub>) δ 8.02-7.94 (m, 2H), 7.61-7.48 (m, 5H), 6.83 (dd, *J* = 18.0, 12.0 Hz, 1H), 6.23 (d, *J* = 18.0 Hz, 1H), 5.80 (d, *J* = 12.0 Hz, 1H). <sup>19</sup>F NMR (376 MHz, CDCl<sub>3</sub>) δ -141.42 – -141.51 (m, 2F), -143.94 – -144.03 (m, 2F). <sup>13</sup>C NMR (125 MHz, CDCl<sub>3</sub>) δ 144.76 (dddd, *J* = 248.9, 10.5, 6.3, 3.9 Hz), 144.31 (dddd, *J* = 244.6, 9.7, 5.8, 3.9 Hz), 133.65 131.51, 129.89, 128.77, 128.54, 126.89, 126.28, 125.17, 124.87, 123.80 (t, *J* = 7.7 Hz), 122.52, 117.81 (t, *J* = 19.2 Hz), 116.42 (t, *J* = 13.4 Hz). HRMS (APCI) *m/z* calcd for C<sub>18</sub>H<sub>10</sub>F<sub>4</sub> 302.0713, found: 302.0716.

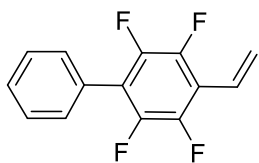

**Compound 1-(2,3,5,6-tetrafluoro-4-vinylphenyl)benzene (6i):**

Prepared according to procedure B for SFMT reactions: (35 mg,

53% yield). <sup>1</sup>H NMR (500 MHz, CDCl<sub>3</sub>) δ 7.53-7.44 (m, 5H), 6.76 (dd, *J* = 18.0, 12.0 Hz, 1H), 6.17 (d, *J* = 18.0 Hz, 1H), 5.75 (d, *J* =

12.0 Hz, 1H). <sup>19</sup>F NMR (376 MHz, CDCl<sub>3</sub>) δ -144.27 – -144.36 (m, 2F), -145.35 – -145.44 (m, 2F). <sup>13</sup>C NMR (125 MHz, CDCl<sub>3</sub>) δ 144.90 (dddd, *J* = 248.1, 10.4, 6.5, 3.9 Hz), 143.83 (dddd, *J* = 244.4, 9.8, 5.3, 4.0 Hz), 130.13(t, *J* = 1.7 Hz), 129.09, 128.56, 127.44, 123.57 (t, *J* = 7.8 Hz), 122.45, 119.11 (t, *J* = 16.8 Hz), 115.73 (t, *J* = 13.5 Hz). HRMS (APCI) *m/z* calcd for C<sub>14</sub>H<sub>8</sub>F<sub>4</sub> 252.0557, found: 252.0560.

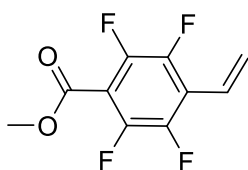

**Compound methyl 2,3,5,6-tetrafluoro-4-vinylbenzoate (6j):**

Prepared according to procedure B for SFMT reactions: (26 mg,

43% yield). <sup>1</sup>H NMR (500 MHz, CDCl<sub>3</sub>) δ 6.70 (dd, *J* = 18.0, 12.0 Hz, 1H), 6.21 (d, *J* = 18.0 Hz, 1H), 5.82 (d, *J* = 12.0 Hz, 1H), 3.98

(s, 3H). <sup>19</sup>F NMR (376 MHz, CDCl<sub>3</sub>) δ -140.43 – -140.53 (m, 2F), -142.72 – -142.82 (m, 2F). <sup>13</sup>C NMR (125 MHz, CDCl<sub>3</sub>) δ 160.21, 145.88-145.46 (m), 143.84-143.46 (m),



125.72 (t,  $J = 7.9$  Hz), 121.94, 119.72 (t,  $J = 13.2$  Hz), 110.58 (t,  $J = 15.7$  Hz). HRMS (APCI)  $m/z$  calcd for  $C_{10}H_6F_4N$  362.1671, found: 362.1673.

Notes: Carefully removed the solvent due to the volatility of **6j**.

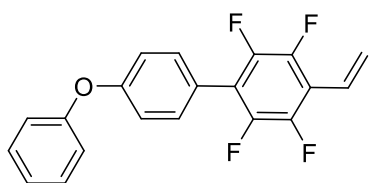

**Compound 2,3,5,6-tetrafluoro-4'-phenoxy-4-vinyl-1,1'-biphenyl (6k):** Prepared according to procedure B for SFMT reactions: (33 mg, 37% yield).  $^1H$  NMR (500 MHz,

$CDCl_3$ )  $\delta$  7.46-7.37 (m, 4H), 7.19-7.15 (m, 1H), 7.11-7.08

(m, 4H), 6.75 (dd,  $J = 18.0, 12.0$  Hz, 1H), 6.16 (d,  $J = 18.0$  Hz, 1H), 5.74 (d,  $J = 12.0$  Hz, 1H).  $^{19}F$  NMR (376 MHz,  $CDCl_3$ )  $\delta$  -144.28 – -144.37 (m, 2F), -145.52 – -145.61 (m, 2F).  $^{13}C$  NMR (125 MHz,  $CDCl_3$ )  $\delta$  158.36, 156.22, 144.93 (dddd,  $J = 248.3, 10.5, 6.2, 4.5$  Hz), 143.84 (ddt,  $J = 244.1, 14.6, 4.4$  Hz), 131.65, 129.92, 124.03, 123.51 (t,  $J = 7.8$  Hz), 122.46, 121.74, 119.73, 118.56 (t,  $J = 16.6$  Hz), 118.18, 115.50 (t,  $J = 13.5$  Hz). HRMS (APCI)  $m/z$  calcd for  $C_{20}H_{12}F_4O$  344.0819, found: 344.0820.

## 9. Trouble Shooting: Frequently Asked Questions

### 9.1 The SFMT reactor platform

**Question 1:** What is an SFMT reactor platform?

The “stop-flow” micro-tubing (SFMT) reactor platform is a design adapted from the continuous flow system, with added batch elements. Instead of making the reaction mixture flow continuously, the SFMT platform allows it to pause at will. This is achieved by the usage of two shut-off valves. The system includes several parts. One syringe pump is used for pumping the constant reagents during screening. Another syringe pump is applied for pumping variable reagents for screening, with switchable syringes. A gas line is applied if gaseous reagents are involved in the reaction. All the reagents will meet at a mixer and flow into the micro-tubing reactor with two shut-off valves equipped at the two ends of each reactor. A back-pressure regulator (BPR) is used to control the system pressure. A heating bath will be utilized as the off-line heating source. This platform is designed for the reaction screening purpose for the continuous-flow synthesis.

**Question 2:** How does the SFMT reactor platform works?

The reagents will be pumped into the micro-tubing reactors by the flow system. After the reagents pass through the BPR, the shut-off valves at the two ends of the reactor will be closed, and the reactor holds almost the same pressure as indicated by the BPR. The reactor will then be disconnected from the flow system. The next empty micro-tubing reactor will be connected to the flow system to fill in the reagents. After all the micro-tubings have been filled with planned reagents, they will be moved to an off-line heating bath for parallel heating. Finally, after desired heating period, the reaction mixture in

each micro-tubing will be washed out by organic solvents to individual sample vials. The crude mixture will be subjected to GC, LC, and NMR analysis to identify the reaction results.

**Question 3:** What kind of pumps should I choose for the SFMT reactor platform?

Different pumps can be chosen for different reaction patterns. In our study, we used Harvard or KDS syringe pumps in our SFMT reactor system as they can work precisely under high-pressure, and syringes with several volume sizes (2.5 mL, 8 mL, 20 mL, 50 mL, and 100 mL) are available for choosing. Peristaltic pumps will be good for the SFMT system for reactions at ambient pressure. We are targeting to use MilliGat pump for a proposed automated SFMT system to switch reagents and solvents.

**Question 4:** How to introduce gas reagents into a SFMT reactor platform?

Gaseous reagents will be supplied from gas tanks with regulators. The gas is introduced into the flow system using the Swagelok stainless steel tubing connected to a Y mixer. The flow of gas is regulated with a needle valve (IDEX) and is visually controlled to 1:1 to 2:1 gas to liquid volume slugs. If a precise control of gas flow rate is required, a digital Mass-Flow controller (SmartTrak 100) is applied.

**Question 5:** What kind of mixers should I choose for my reactions?

In our study, the T or Y mixers with thru-hole 0.02 inch from IDEX (P-727, P-512) worked well for most of cases. For homogeneous reactions, to attempt improved mixing efficiency, more advanced micro-mixers such as the IMM single mixer or Yamatake YM-1 mixer can be utilized.<sup>[26]</sup>

**Question 6:** What kind of reactors should I choose for my reactions?

Micro-tubings made by any material can potentially be applied to the SFMT platform, such as polymers, stainless-steel (SS), glass, etc. In our study, SS-tubings were used for reactions with temperatures above 100 °C as it can withstand the heat and pressure. HPFA tubings were used for ambient/ cold/ temperatures up to 120 °C reactions. The HPFA tubing is also applied for photoredox reactions due to its transparency and high surface volume of reagents exposed to the light source. Glass tubings can also be applied to light-promoted reactions. For gas/liquid reactions, gases will pass through the HPFA tubing during heating (e.g. 100 °C) at high pressure (e.g. 100 psi). If gas leaking is observed, HPFA tubing can be replaced with SS-tubing. Glass tubing and TEFZEL tubing can be used if light reactions are involved to stand higher temperature and pressure.

**Question 7:** What is the size of the micro-tubing reactor?

The inner diameter of the micro-tubing reactor is normally less than 1mm. The volume of the tubing can be calculated by  $V=\pi r^2L$ , and can be any volume in principle. For the reaction screening purpose in our study, we normally used tubings with approximate 1.37 mL volume.

**Question 8:** What is the reaction scale in the SFMT reactor?

The scale of one reaction in the SFMT reactor is determined by the reactor size, the reaction nature, and concentration. For instance, in the case of homogeneous liquid

reaction, to achieve a 1 mmol production (based on 100% yield) with a 0.2 M concentration reaction mixture, ~ 6.17 meter of micro-tubing with 0.04 inch I.D. is needed. If the tubing I.D. is 0.062 inch, ~ 2.56 meter of the micro-tubing is needed. In the case of gas/liquid reaction, the tubing length normally needs to be doubled. However, reactions at 0.2 mmol scale are instructive enough for evaluation. However, the SFMT reactor can be used for gram scale synthesis. The reaction scale can also be increased by numbering-up strategy.

**Question 9:** What kind of BPRs should I choose for my reactions?

BPRs from IDEX were utilized in our study as there are many choices (5, 20, 40, 75, 100, 250, 500, 750, 1000 psi), and they can be used jointed to achieve a certain amount of back-pressure. Zaiput BPR is used for tunable pressure. Swagelok BPR can also be used for this purpose.

**Question 10:** How to proceed the off-line heating or cooling?

If the screening is conducted at high temperature, all the micro-tubing reactors can be filled with reagents to be tested at room temperature first, and then heated together in an oil bath. If the screening is conducted at low temperature, the reagents will be filled into the micro-tubing reactor in a cooling bath at the required reaction temperature with reaction time started to be calculated once the micro-reactor was fully filled.

**Question 11:** How do I monitor the reaction in a SFMT reactor?

During the screening period, the SFMT reactor is not monitored. After reactions are quenched, the crude mixtures will be subjected to TLC, NMR, and GC/LC-MS analysis.

**Question 12:** What is the exact pressure in a SFMT reactor?

The pressure in a SFMT reactor should be roughly equal to the set back-pressure after the shut-off valves are closed at room temperature. During heating, the pressure inside the tubing will increase. It can be roughly calculated by  $P_1/T_1 = P_2/T_2$  according to Amontons's Law.

**Question 13:** Why continuous flow resulted in slightly better yields than SFMT reactors?

This can be explained by the excellent mixing efficiency due to the toroidal vortices generated in continuous heterogeneous segmented flow. However, results from SFMT reactors are instructive enough for the purpose of reaction discovery/optimization.

**Question 14:** Do I need to wash the system between two different reactions?

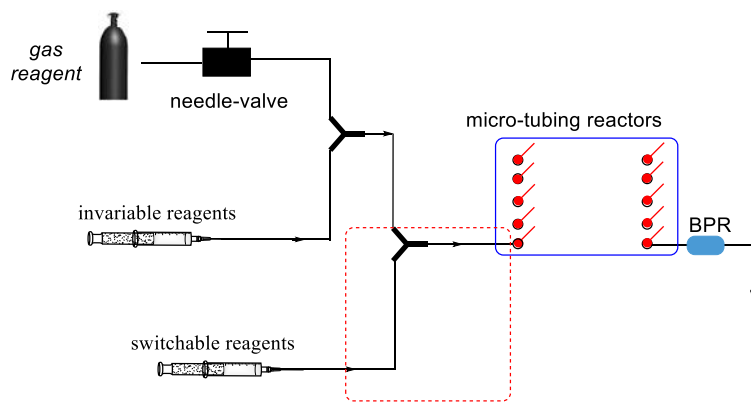

The part in red rectangle needs to be washed every time between two different reactions. You can design this part of tubing as short as possible.

**Question 15:** Can the SFMT system become automatic?

Yes. We are currently proposed an automated prototype of the SFMT system. A typical system will include: one syringe pump for constant reagents/solvents, and one MilliGat pump for switchable reagents/catalysts/solvents, one gas mass flow controller, a four-way mixer, two multi-channel valves, one set of parallel stop-flow micro-tubing reactors, one oil tank or cooler to control temperature, one pressure sensor, one back pressure regulator, and a vial holder for sample vials. The MilliGat pump will be used for switchable reagents as it is able to achieve automated pumping among different reagents at high pressure avoiding refilling or cross-contamination.<sup>[27]</sup> All the shut-off valves for stop-flow reactors will be mounted on a stainless steel mantle, and the tubing reactors will be connected and immersed in the oil tank for heating or a cooling bath for low temperature reactions. A computer system will be used to control the automated system.

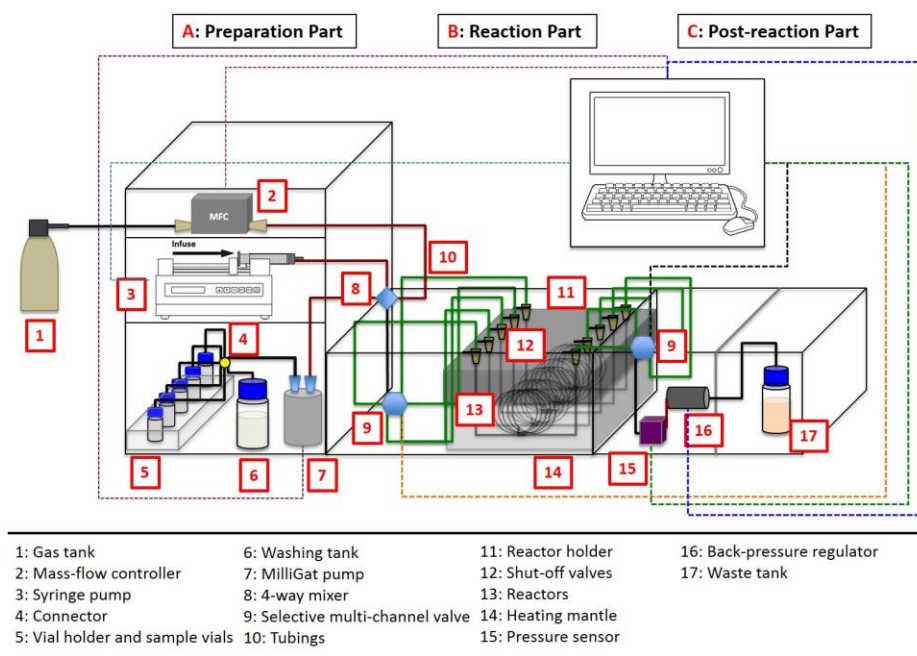

## 9.2 Sonogashira coupling

**Question 1:** What are other methods to make terminal alkynes?

Terminal alkynes can also be generated from aldehyde by Corey-Fuchs reaction or using the Ohira-Bestmann reagent. They also can be synthesized from elimination of dihalogenated alkanes. However, these transformations require expensive starting materials or reagents, which makes the large-scale industrial production of terminal alkynes through these methods impossible. To prepare terminal alkynes or unsymmetric internal alkynes from halogenated precursors, a protected acetylene, such as trimethylsilylacetylene or 2-methyl-3-butyn-2-ol,<sup>[28]</sup> was normally applied, followed by the release of the protecting group.

**Question 2:** What if the reaction does not proceed to completion?

If there is still starting bromide or iodide compounds left, the reaction can be proceeded with longer reaction time or with slightly higher temperature to push to a full conversion.

**Question 3:** Is there a trend to predict the reaction selectivity of terminal alkynes vs internal alkynes?

Aryl iodides with electron-donating aryl rings and vinyl bromides generally afforded very good selectivity. However, aryl iodides with electron-withdrawing group afforded lower selectivity. This is probably because the generated terminal alkynes with electron-withdrawing group is more acidic and easier to generate the copper intermediate than acetylene to undergo further Sonogashira coupling with aryl iodides again.

**Question 4:** What if the reaction selectivity is not good?

Reducing the reaction temperature or the concentration of starting halogen compounds should help to increase the selectivity.

**Question 5:** How sensitive is this transformation towards air?

The reactions were not performed strictly anhydrously. AR ACS grade DMSO was used in our study.

**Question 6:** What is the concentration of starting materials for the success of the selective coupling?

0.1 M concentration was applied in our “stop-flow” or “continuous-flow” process. Compared to Vasilevsky’s batch study at 0.033 M, our concentration is much higher and more practical.

## 9.3 Fulvene synthesis

**Question 1:** How stable are these fulvene products?

Fulvenes are oxygen and heat-sensitive compounds. However, they can be purified by a quick flash column chromatography over silica gel.

**Question 2:** Any care needs to be taken during product purification and storage to avoid possible decomposition?

All fulvene compounds should be stored in freezer under Ar or N<sub>2</sub>.

**Question 3:** Why is the fulvene compound the sole product instead of Sonogashira coupling products without the copper co-catalyst?

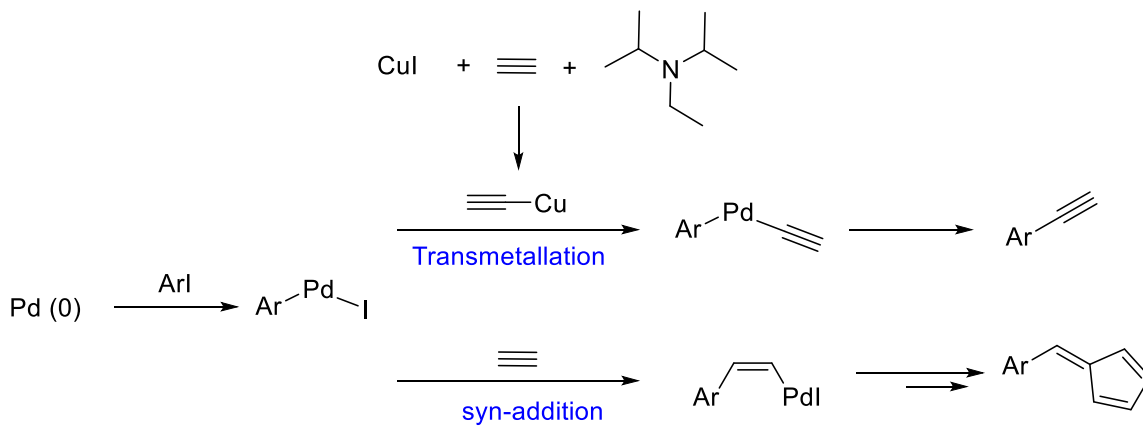

In the presence of copper catalyst and a base, acetylene will generate the acetylene copper complex, which is nucleophilic enough to undergo transmetallation with the aryl palladium intermediate to achieve the Sonogashira coupling products. Without the copper catalyst, the acetylene is not nucleophilic enough and *syn* addition will take place, which will eventually lead to fulvene products.

**Question 4:** Why is a packed-bed reactor used in the continuous-flow synthesis instead of a tubing reactor?

The outlet pressure of acetylene is < 30 psi. When we conducted the fulvene synthesis in continuous micro-tubing reactors with a back pressure regulator (5 psi) at 120 °C, the pressure cumulation can be higher than 30 psi which resulted in back flow in the continuous-flow system. We anticipated that the pressure drop will be much smaller in a packed-bed reactor instead of a micro-tubing reactor. This was true in that a packed-bed reactor filled with stainless steel powder was able to overcome the back-flow problem in our studies.

#### 9.4 Fluorinated styrene synthesis

**Question 1:** What are the by-products in this reaction?

The common byproduct from this photo-initiated fluorinated styrene synthesis was the debrominated fluorinated arene. If the conversion did not reach 100%, the unreacted aryl bromide starting material was detected in the crude mixture as well.

**Question 2:** How to purify the desired product?

The crude mixtures, which may contain the debrominated arene, the aryl bromide starting material and the styrene product, were difficult to be separated by silica-gel based chromatography purification, because most of these compounds were un-polar, and co-spotted on the silica TLC. However, they can be effectively separated by Recycling Preparative HPLC equipped with JAIGEL -2H columns (GPC, CHCl<sub>3</sub>, as an eluent) from

Japan Analytical Industry Co.,Ltd. We also expect that the reverse-phase (C18-based) HPLC or chromatography should achieve pure product separation as well.

**Question 3:** What can these fluorinated styrene products be used for?

These fluorinated styrene products can be used in a wide range of applications in fluorinated polymer synthesis.

#### 10. References and Notes:

- [1] A. U. Meyer, T. Slanina, C.-J. Yao, B. König, *ACS Catal.* **2016**, *6*, 369.
- [2] J. A. Kozak, J. Wu, X. Su, F. Simeon, T. A. Hatton, T. F. Jamison, *J. Am. Chem. Soc.* **2013**, *135*, 18497.
- [3] A. C. Spivey, C. G. Manas, I. Mann, *Chem. Commun.* **2005**, 4426.
- [4] G. Majetich, R. Hicks, *J. Microw. Power Electromagn. Energy* **1995**, *30*, 27.
- [5] K. E. Harding, L. M. May, K. F. Dick, *J. Org. Chem.* **1975**, *40*, 1664.
- [6] Z.-L. Shen, X.-P. Xu, S.-J. Ji, *J. Org. Chem.* **2010**, *75*, 1162.
- [7] J. Li, R. Hua, *Chem. Eur. J.* **2011**, *17*, 8462.
- [8] K. Voigtritter, S. Ghorai, B. H. Lipshutz, *J. Org. Chem.* **2011**, *76*, 4697.
- [9] A. Klapars, S. L. Buchwald, *J. Am. Chem. Soc.* **2002**, *124*, 14844.
- [10], Y.-S. Feng C.-Q. Xie, W.-L. Qiao, H.-J. Xu, *Org. Lett.* **2013**, *15*, 936.
- [11] M. Ghaffarzadeh, M. Bolourchian, Z. H. Fard, M. R. Halvagar, F. Mohsenzadeh, *Syn. Comm.* **2006**, *36*, 1973.
- [12] M. Beshai, B. Dhudshia, R. Mills, A. N. Thadani, *Tetrahedron Lett.* **2008**, *49*, 6794.
- [13] T. Yasukawa, H. Miyamura, S. Kobayashi, *Org. Biomol. Chem.* **2011**, *9*, 6208.
- [14] M. A. Reddy, A. Thomas, G. Mallesham, B. Sridhar, V. J. Rao, K. Bhanuprakash, *Tetrahedron Lett.* **2011**, *52*, 6942.
- [15] K. Kodaira, K. Okuhara *Bull. Chem. Soc. Jpn.* **1988**, *61*, 1625.
- [16] H. C. Bertrand, M. Schaap, L. Baird, N. D. Georgakopoulos, A. Fowkes, C. Thiollier, H. Kachi, A. T. Dinkova-Kostova, G. Wells, *J. Med. Chem.* **2015**, *58*, 7186.
- [17] H. Liu, C. Chen, L. Wang, X. Tong, *Org. Lett.* **2011**, *13*, 5072.
- [18] N. T. Patil, V. Singh, *Chem. Comm.* **2011**, *47*, 11116.
- [19] N. Coçkun, I. Erden, *Tetrahedron* **2011**, *67*, 8607.
- [20] M. Cini, T. D. Bradshaw, W. Lewis, S. Woodward, *Eur. J. Org. Chem.* **2013**, 3997.
- [21] H. Müller-Bunz *et al. Zeitschrift fuer Kristallographie*, **2007**, *222*, 376.
- [22] F.-J. Rehmman, L. P. Cuffe, O. Mendoza, D. K. Rai, N. Sweeney, K. Strohfeltd, W. M. Gallagher, M. Tacke, *Appl. Organometal. Chem.* **2005**, *19*, 293.
- [23] N. Carrera, E. Gutiérrez, R. Benavente, M. M. Villavieja, Ana C. Albéniz, P. Espinet, *Chem. Eur. J.* **2008**, *14*, 10141.
- [24] T. Braun, J. Izundu, A. Steffen, B. Neumann, H.-G. Stammer, *Dalton Trans.* **2006**, 5118
- [25] K. Yuhsuke, K. Hiroo, A. Toshiki, Y. Yoshihiro, H. Hirofumi, Y. Yuya, *Polymer J.* **1985**, 1159.

[26] H. Wakami, J.-I. Yoshida, *Org. Process Res. Dev.* **2005**, *9*, 781-791.

[27] [https://www.globalfia.com/store/view/productdetails/virtuemart\\_product\\_id/91/virtuemart\\_category\\_id/13](https://www.globalfia.com/store/view/productdetails/virtuemart_product_id/91/virtuemart_category_id/13)

[28] Z. Novák, P. Nemes, A. Kotschy, *Org. Lett.* **2004**, *6*, 4917.

## 11. NMR Spectra for New Compounds

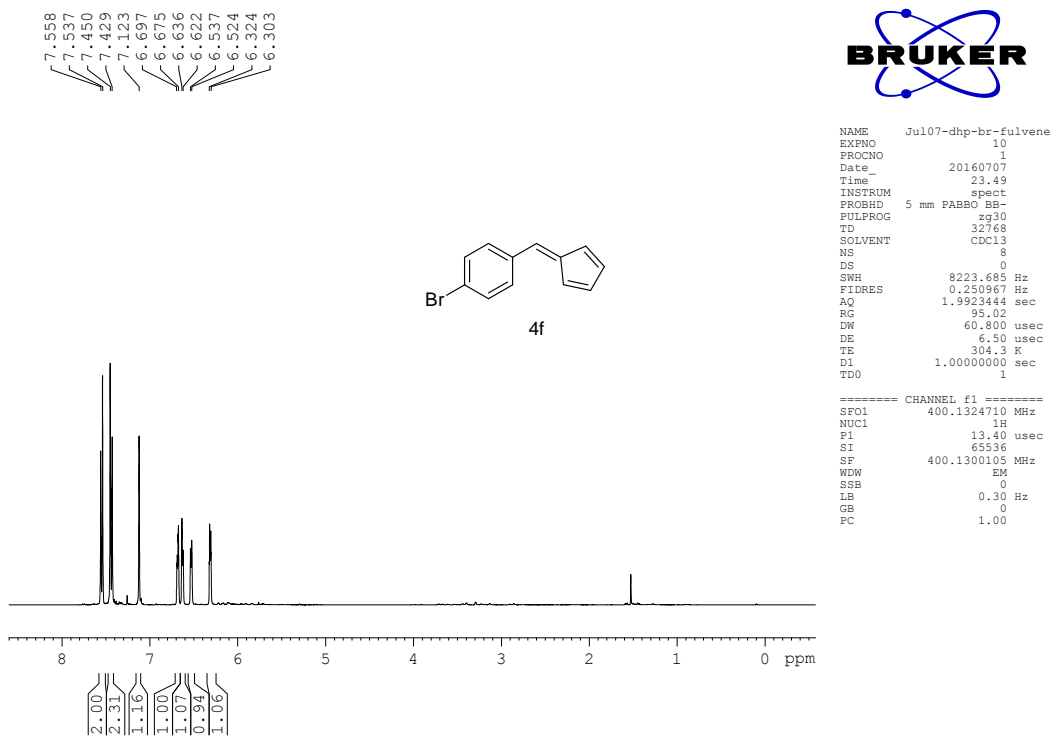



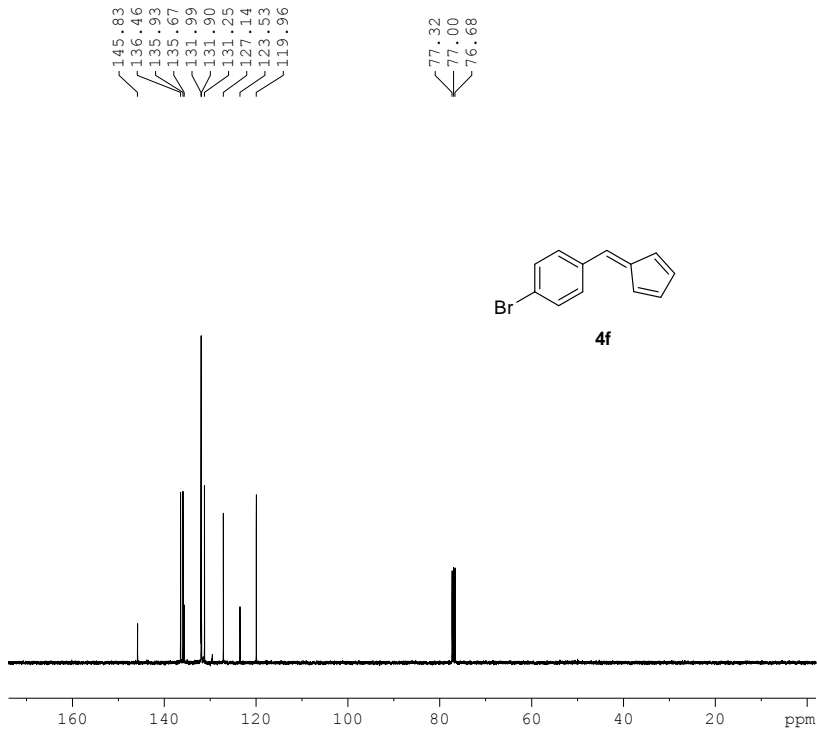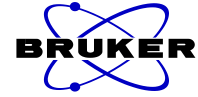

```

NAME      Jul07-dhp-br-fulvene
EXPNO     11
PROCNO    1
Date_     20160708
Time_     0.14
INSTRUM   spect
PROBHD    5 mm PABBO BB-
PULPROG   zgpg30
TD        65536
SOLVENT   CDCl3
NS        500
DS        4
SWH       24038.461 Hz
FIDRES    0.366798 Hz
AQ        1.3631988 sec
RG        194.02
DW        20.800 usec
DE        6.50 usec
TE        305.1 K
D1        1.5000000 sec
D11       0.0300000 sec
TDO       1
  
```

```

===== CHANNEL f1 =====
SFO1     100.623364 MHz
NUC1     13C
P1       9.40 usec
SI       32768
SF       100.612707 MHz
WDW      EM
SSB      0
LB       1.00 Hz
GB       0
PC       1.40
  
```

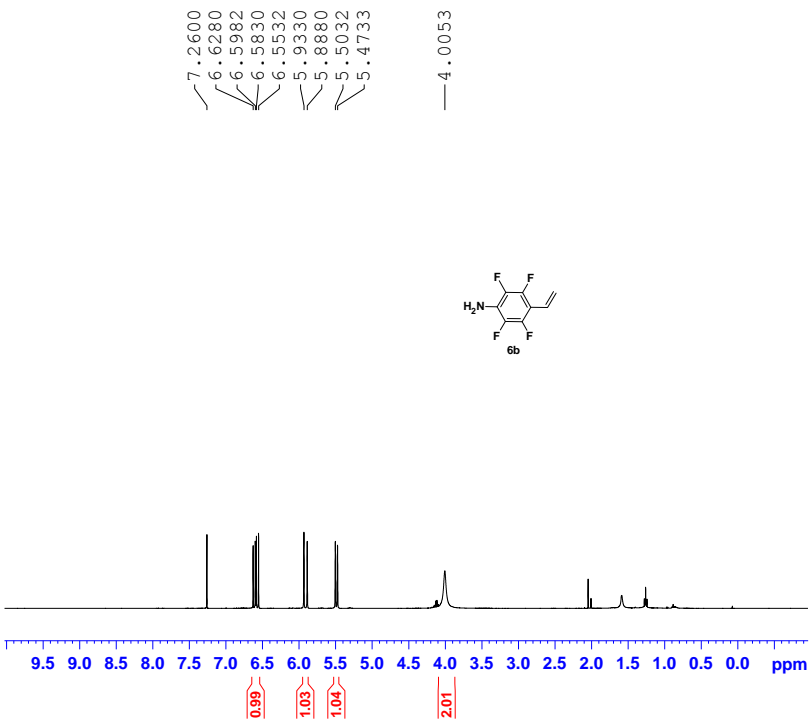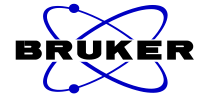

```

NAME      Aug08xf-NH2-GPC
EXPNO     1
PROCNO    1
Date_     20160808
Time_     10.19
INSTRUM   spect
PROBHD    5 mm PABBO BB-
PULPROG   zg30
TD        32768
SOLVENT   CDCl3
NS        8
DS        0
SWH       8223.685 Hz
FIDRES    0.250967 Hz
AQ        1.9923444 sec
RG        194.02
DW        60.800 usec
DE        6.50 usec
TE        298.8 K
D1        1.0000000 sec
TDO       1
  
```

```

===== CHANNEL f1 =====
SFO1     400.1324710 MHz
NUC1     1H
P1       13.40 usec
SI       65536
SF       400.1300100 MHz
WDW      EM
SSB      0
LB       0.30 Hz
GB       0
PC       1.00
  
```

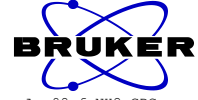

```

NAME      Aug08xf-NH2-GPC
EXPNO     2
PROCNO    1
Date_     20160808
Time      10.22
INSTRUM   spect
PROBHD    5 mm PABBO BB-
FULPROG   zgfhlgpn.2
TD         131072
SOLVENT   CDCl3
NS         32
DS         4
SWH       89285.711 Hz
FIDRES    0.681196 Hz
AQ         0.7340532 sec
RG         194.02
DW         5.600 usec
DE         6.50 usec
TE         299.1 K
D1         1.00000000 sec
D11        0.03000000 sec
D12        0.00002000 sec
TDO        1

===== CHANNEL f1 =====
SFO1      376.4607164 MHz
NUC1      19F
P1         13.40 usec
SI         65536
SF         376.4983660 MHz
WDW        EM
SSB        0
LB         0.30 Hz
GB         0
PC         1.00

```

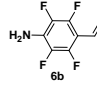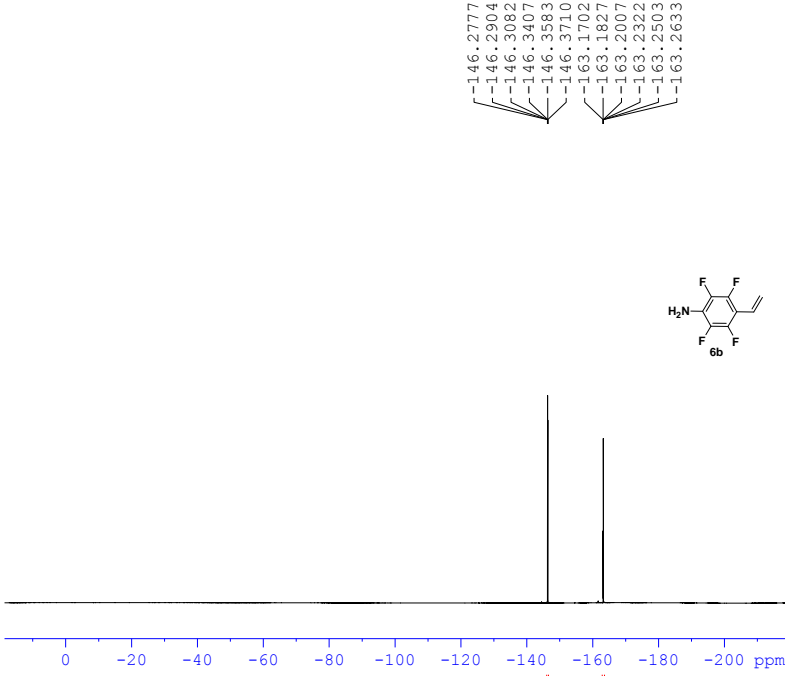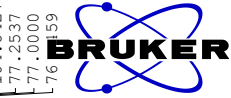

```

NAME      xf0803-NH2-GPC
EXPNO     2
PROCNO    1
Date_     20160803
Time      20.57
INSTRUM   spect
PROBHD    5 mm PABBO BB/
FULPROG   zgpg30
TD         65536
SOLVENT   CDCl3
NS         13720
DS         0
SWH       30030.029 Hz
FIDRES    0.458222 Hz
AQ         1.0912410 sec
RG         16384
DW         16.650 usec
DE         6.00 usec
TE         295.7 K
D1         2.00000000 sec
d11        0.03000000 sec
DELTA     1.89999998 sec
TDO        1000

===== CHANNEL f1 =====
NUC1      13C
P1         8.90 usec
PL1        0.00 dB
SFO1      125.7709936 MHz

===== CHANNEL f2 =====
CPDPRG2   waltz16
NUC2      1H
PCPD2     80.00 usec
PL2        0.25 dB
PL12       17.89 dB
PL13       15.83 dB
SFO2      500.1320005 MHz
SI         32768
SF         125.7577903 MHz
WDW        EM
SSB        0
LB         1.00 Hz
GB         0
PC         0.50

```

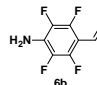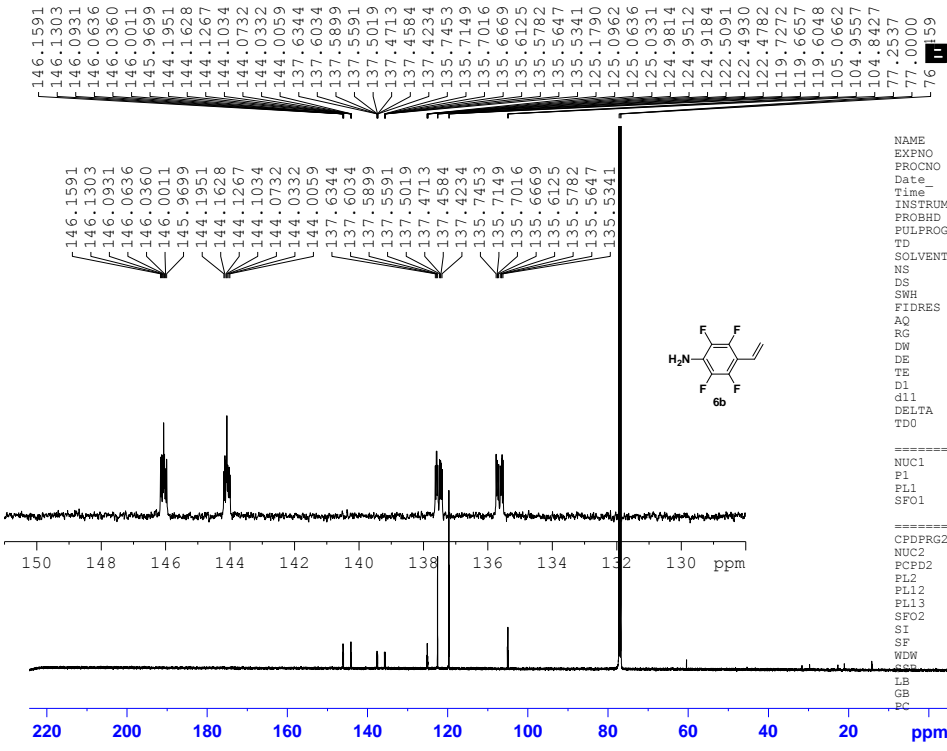

8.0227  
8.0195  
8.0163  
7.9184  
7.9096  
7.9084  
7.9022  
7.8985  
7.8908  
7.8866  
7.8853  
7.8783  
7.4099  
7.4041  
7.3975  
7.3915  
7.3861  
7.3807  
7.3785  
7.3729  
7.3685  
7.3602  
7.3549  
7.2808  
7.2773  
7.2722  
7.2646  
7.2600  
7.2548  
7.2499  
7.2499  
6.8027  
6.7729  
6.7577  
6.2610  
6.2160  
5.8659  
5.8361

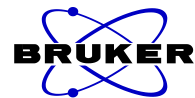

```

NAME      Aug01xf-benimi-GPC
EXPNO     1
PROCNO    1
Date_     20160801
Time      11.52
INSTRUM   spect
PROBHD    5 mm PABBO BB-
PULPROG   zg30
TD        32768
SOLVENT   CDC13
NS        8
DS        0
SWH       8223.685 Hz
FIDRES    0.250967 Hz
AQ        1.9923444 sec
RG        120.14
DW        60.800 usec
DE        6.50 usec
TE        299.3 K
D1        1.00000000 sec
TD0       1
  
```

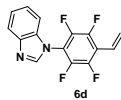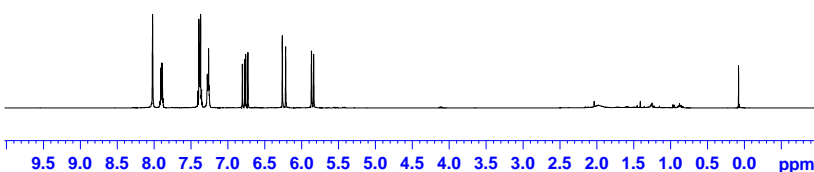

```

===== CHANNEL f1 =====
SFO1     400.1324710 MHz
NUC1      1H
P1       13.40 usec
SI       65536
SF       400.1300100 MHz
WDW      EM
SSB      0
LB       0.30 Hz
GB       0
PC       1.00
  
```

-141.6969  
-141.7093  
-141.7336  
-141.7598  
-141.7835  
-141.7961  
-147.1127  
-147.1261  
-147.1494  
-147.1767  
-147.1992  
-147.2129

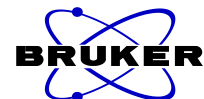

```

NAME      Aug01xf-benimi-GPC
EXPNO     2
PROCNO    1
Date_     20160801
Time      11.54
INSTRUM   spect
PROBHD    5 mm PABBO BB-
PULPROG   zgfhigqn.2
TD        131072
SOLVENT   CDC13
NS        4
DS        4
SWH       89285.711 Hz
FIDRES    0.681196 Hz
AQ        0.7340532 sec
RG        194.02
DW        5.600 usec
DE        6.50 usec
TE        299.6 K
D1        1.00000000 sec
D11       0.03000000 sec
D12       0.00002000 sec
TD0       1
  
```

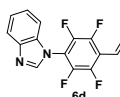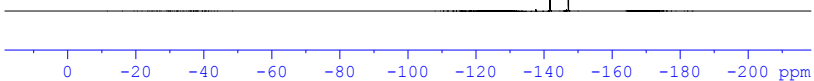

```

===== CHANNEL f1 =====
SFO1     376.4607164 MHz
NUC1     19F
P1       13.40 usec
SI       65536
SF       376.4983660 MHz
WDW      EM
SSB      0
LB       0.30 Hz
GB       0
PC       1.00
  
```

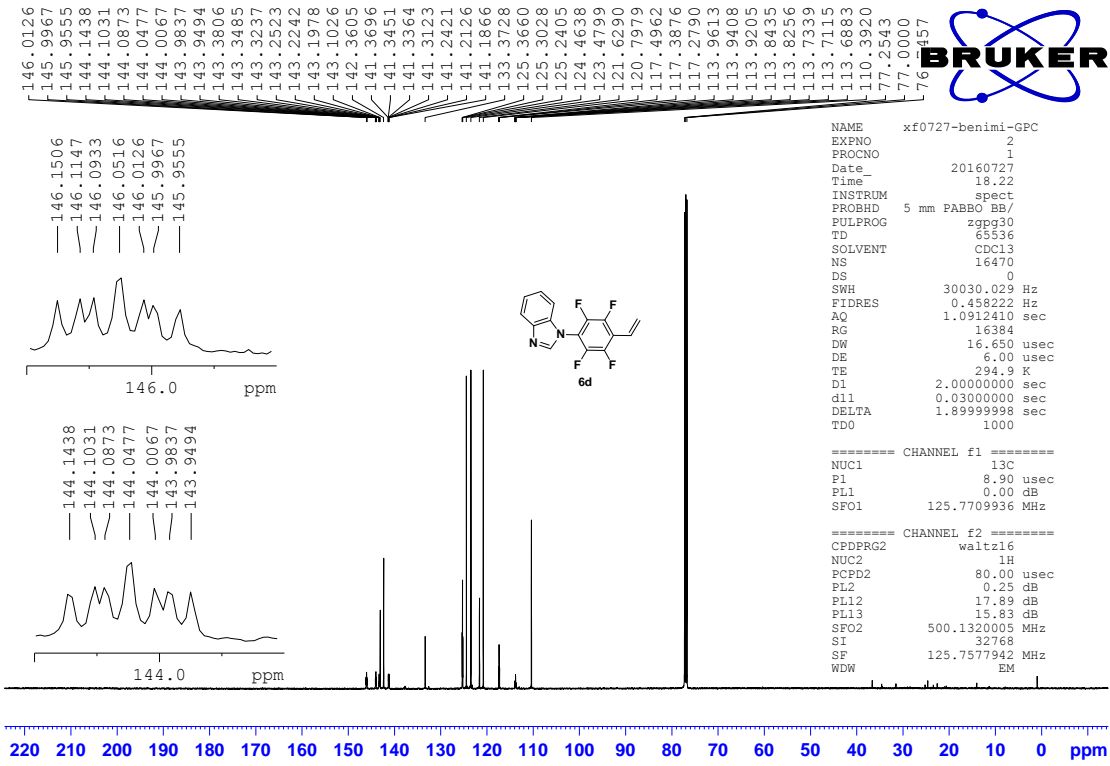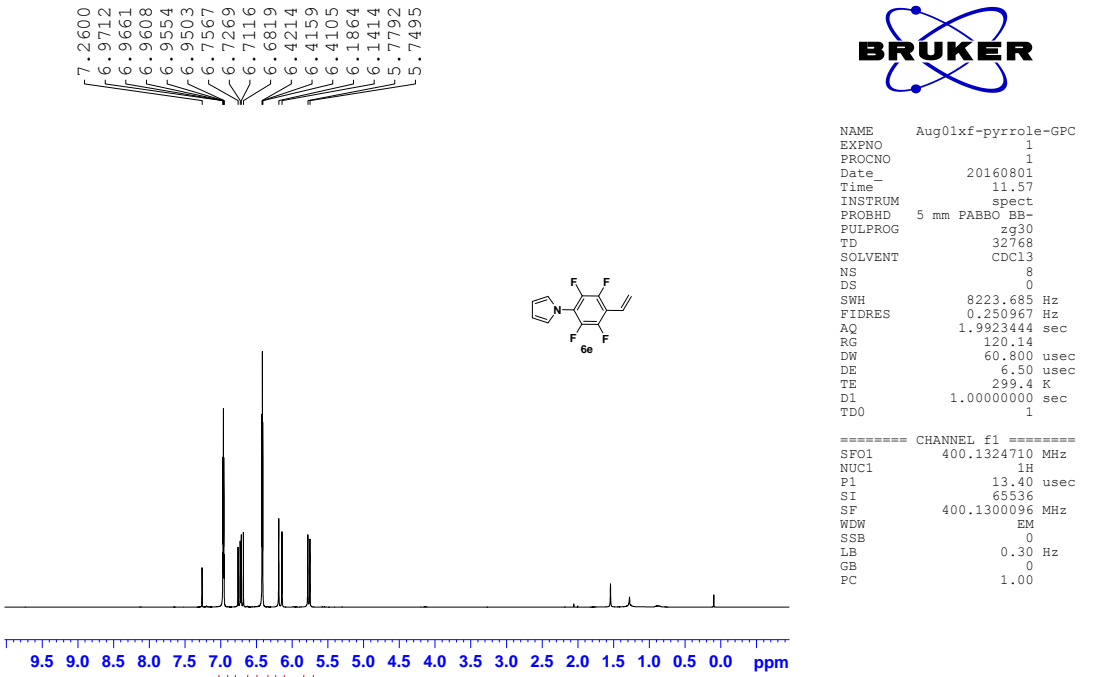

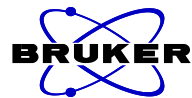

```

NAME      Aug01xf-pyrrole-GPC
EXPNO     2
PROCNO    1
Date_     20160801
Time      11.58
INSTRUM   spect
PROBHD    5 mm PABBO BB-
PULPROG   zgfhgqn.2
TD        131072
SOLVENT   CDC13
NS        32
DS        4
SWH       89285.711 Hz
FIDRES    0.681196 Hz
AQ        0.7340532 sec
RG        194.02
DW        5.600 usec
DE        6.50 usec
TE        299.7 K
D1        1.00000000 sec
D11       0.03000000 sec
D12       0.00002000 sec
TD0       1

```

```

===== CHANNEL f1 =====
SFO1     376.4607164 MHz
NUC1     19F
P1       13.40 usec
SI       65536
SF       376.4983660 MHz
WDW      EM
SSB      0
LB       0.30 Hz
GB       0
PC       1.00

```

-143.2175  
-143.2262  
-143.2503  
-143.2790  
-143.3012  
-143.3099  
-151.1019  
-151.1103  
-151.1351  
-151.1620  
-151.1858  
-151.1948

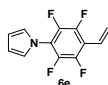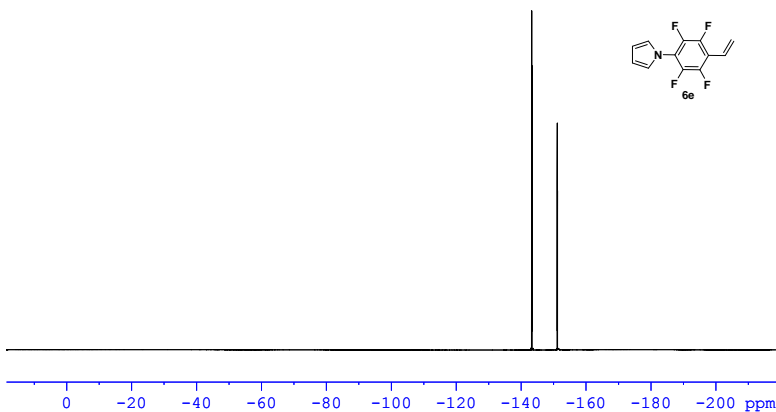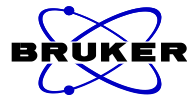

```

NAME      xf0730-pyrrole-GPC
EXPNO     2
PROCNO    1
Date_     20160730
Time      18.03
INSTRUM   spect
PROBHD    5 mm PABBO BB-
PULPROG   zgpg30
TD        65536
SOLVENT   CDC13
NS        24945
DS        0
SWH       30030.029 Hz
FIDRES    0.458222 Hz
AQ        1.0912410 sec
RG        16384
DW        16.650 usec
DE        6.00 usec
TE        295.5 K
D1        2.00000000 sec
d11       0.03000000 sec
DELTA     1.89999998 sec
TD0       1000

```

```

===== CHANNEL f1 =====
NUC1     13C
P1       8.90 usec
PL1     0.00 dB
SFO1     125.7709936 MHz

```

```

===== CHANNEL f2 =====
CPDPRG2   waltz16
NUC2      1H
PCPD2     80.00 usec
PL2       0.25 dB
PL12     17.89 dB
PL13     15.83 dB
SFO2     500.1320005 MHz
SI        32768
SF       125.7577929 MHz
WDW      EM

```

146.2525  
146.2180  
146.1916  
146.1520  
146.1103  
146.0888  
146.0515  
144.2599  
144.2224  
144.2003  
144.1627  
144.1181  
144.0923  
144.0573  
142.4207  
142.3932  
142.3658  
142.2911  
142.2678  
142.2361  
140.4330  
140.4094  
140.3774  
140.3067  
140.2799  
140.2520

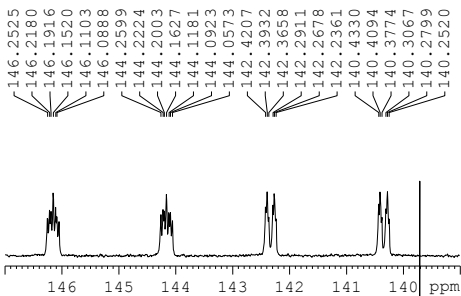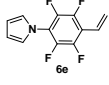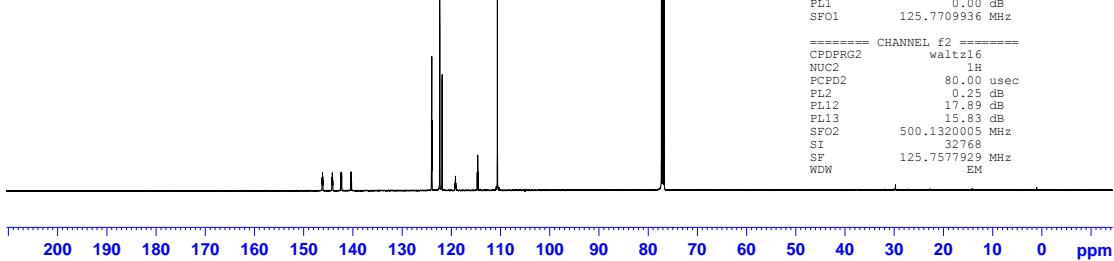

7.8122  
7.3018  
7.2600  
6.7422  
6.7185  
6.7064  
6.6825  
6.2096  
6.1736  
5.8229  
5.7991

1.8791

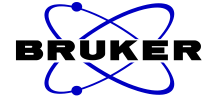

```

NAME      xf0725-imi-GPC
EXPNO     1
PROCNO    1
Date_     20160725
Time      18.03
INSTRUM   spect
PROBHD    5 mm PABBO BB/
PULPROG   zg30
TD         32768
SOLVENT   CDCl3
NS         8
DS         0
SWH       10330.578 Hz
FIDRES    0.315264 Hz
AQ        1.5860696 sec
RG         228.1
DW         48.400 usec
DE         6.00 usec
TE         292.5 K
D1         1.00000000 sec
D11        1
D12        1
D13        1
D14        1
D15        1
D16        1
D17        1
D18        1
D19        1
D20        1
D21        1
D22        1
D23        1
D24        1
D25        1
D26        1
D27        1
D28        1
D29        1
D30        1
D31        1
D32        1
D33        1
D34        1
D35        1
D36        1
D37        1
D38        1
D39        1
D40        1
D41        1
D42        1
D43        1
D44        1
D45        1
D46        1
D47        1
D48        1
D49        1
D50        1
D51        1
D52        1
D53        1
D54        1
D55        1
D56        1
D57        1
D58        1
D59        1
D60        1
D61        1
D62        1
D63        1
D64        1
D65        1
D66        1
D67        1
D68        1
D69        1
D70        1
D71        1
D72        1
D73        1
D74        1
D75        1
D76        1
D77        1
D78        1
D79        1
D80        1
D81        1
D82        1
D83        1
D84        1
D85        1
D86        1
D87        1
D88        1
D89        1
D90        1
D91        1
D92        1
D93        1
D94        1
D95        1
D96        1
D97        1
D98        1
D99        1
D100       1
D101       1
D102       1
D103       1
D104       1
D105       1
D106       1
D107       1
D108       1
D109       1
D110       1
D111       1
D112       1
D113       1
D114       1
D115       1
D116       1
D117       1
D118       1
D119       1
D120       1
D121       1
D122       1
D123       1
D124       1
D125       1
D126       1
D127       1
D128       1
D129       1
D130       1
D131       1
D132       1
D133       1
D134       1
D135       1
D136       1
D137       1
D138       1
D139       1
D140       1
D141       1
D142       1
D143       1
D144       1
D145       1
D146       1
D147       1
D148       1
D149       1
D150       1
D151       1
D152       1
D153       1
D154       1
D155       1
D156       1
D157       1
D158       1
D159       1
D160       1
D161       1
D162       1
D163       1
D164       1
D165       1
D166       1
D167       1
D168       1
D169       1
D170       1
D171       1
D172       1
D173       1
D174       1
D175       1
D176       1
D177       1
D178       1
D179       1
D180       1
D181       1
D182       1
D183       1
D184       1
D185       1
D186       1
D187       1
D188       1
D189       1
D190       1
D191       1
D192       1
D193       1
D194       1
D195       1
D196       1
D197       1
D198       1
D199       1
D200       1
D201       1
D202       1
D203       1
D204       1
D205       1
D206       1
D207       1
D208       1
D209       1
D210       1
D211       1
D212       1
D213       1
D214       1
D215       1
D216       1
D217       1
D218       1
D219       1
D220       1
D221       1
D222       1
D223       1
D224       1
D225       1
D226       1
D227       1
D228       1
D229       1
D230       1
D231       1
D232       1
D233       1
D234       1
D235       1
D236       1
D237       1
D238       1
D239       1
D240       1
D241       1
D242       1
D243       1
D244       1
D245       1
D246       1
D247       1
D248       1
D249       1
D250       1
D251       1
D252       1
D253       1
D254       1
D255       1
D256       1
D257       1
D258       1
D259       1
D260       1
D261       1
D262       1
D263       1
D264       1
D265       1
D266       1
D267       1
D268       1
D269       1
D270       1
D271       1
D272       1
D273       1
D274       1
D275       1
D276       1
D277       1
D278       1
D279       1
D280       1
D281       1
D282       1
D283       1
D284       1
D285       1
D286       1
D287       1
D288       1
D289       1
D290       1
D291       1
D292       1
D293       1
D294       1
D295       1
D296       1
D297       1
D298       1
D299       1
D300       1
D301       1
D302       1
D303       1
D304       1
D305       1
D306       1
D307       1
D308       1
D309       1
D310       1
D311       1
D312       1
D313       1
D314       1
D315       1
D316       1
D317       1
D318       1
D319       1
D320       1
D321       1
D322       1
D323       1
D324       1
D325       1
D326       1
D327       1
D328       1
D329       1
D330       1
D331       1
D332       1
D333       1
D334       1
D335       1
D336       1
D337       1
D338       1
D339       1
D340       1
D341       1
D342       1
D343       1
D344       1
D345       1
D346       1
D347       1
D348       1
D349       1
D350       1
D351       1
D352       1
D353       1
D354       1
D355       1
D356       1
D357       1
D358       1
D359       1
D360       1
D361       1
D362       1
D363       1
D364       1
D365       1
D366       1
D367       1
D368       1
D369       1
D370       1
D371       1
D372       1
D373       1
D374       1
D375       1
D376       1
D377       1
D378       1
D379       1
D380       1
D381       1
D382       1
D383       1
D384       1
D385       1
D386       1
D387       1
D388       1
D389       1
D390       1
D391       1
D392       1
D393       1
D394       1
D395       1
D396       1
D397       1
D398       1
D399       1
D400       1
D401       1
D402       1
D403       1
D404       1
D405       1
D406       1
D407       1
D408       1
D409       1
D410       1
D411       1
D412       1
D413       1
D414       1
D415       1
D416       1
D417       1
D418       1
D419       1
D420       1
D421       1
D422       1
D423       1
D424       1
D425       1
D426       1
D427       1
D428       1
D429       1
D430       1
D431       1
D432       1
D433       1
D434       1
D435       1
D436       1
D437       1
D438       1
D439       1
D440       1
D441       1
D442       1
D443       1
D444       1
D445       1
D446       1
D447       1
D448       1
D449       1
D450       1
D451       1
D452       1
D453       1
D454       1
D455       1
D456       1
D457       1
D458       1
D459       1
D460       1
D461       1
D462       1
D463       1
D464       1
D465       1
D466       1
D467       1
D468       1
D469       1
D470       1
D471       1
D472       1
D473       1
D474       1
D475       1
D476       1
D477       1
D478       1
D479       1
D480       1
D481       1
D482       1
D483       1
D484       1
D485       1
D486       1
D487       1
D488       1
D489       1
D490       1
D491       1
D492       1
D493       1
D494       1
D495       1
D496       1
D497       1
D498       1
D499       1
D500       1
D501       1
D502       1
D503       1
D504       1
D505       1
D506       1
D507       1
D508       1
D509       1
D510       1
D511       1
D512       1
D513       1
D514       1
D515       1
D516       1
D517       1
D518       1
D519       1
D520       1
D521       1
D522       1
D523       1
D524       1
D525       1
D526       1
D527       1
D528       1
D529       1
D530       1
D531       1
D532       1
D533       1
D534       1
D535       1
D536       1
D537       1
D538       1
D539       1
D540       1
D541       1
D542       1
D543       1
D544       1
D545       1
D546       1
D547       1
D548       1
D549       1
D550       1
D551       1
D552       1
D553       1
D554       1
D555       1
D556       1
D557       1
D558       1
D559       1
D560       1
D561       1
D562       1
D563       1
D564       1
D565       1
D566       1
D567       1
D568       1
D569       1
D570       1
D571       1
D572       1
D573       1
D574       1
D575       1
D576       1
D577       1
D578       1
D579       1
D580       1
D581       1
D582       1
D583       1
D584       1
D585       1
D586       1
D587       1
D588       1
D589       1
D590       1
D591       1
D592       1
D593       1
D594       1
D595       1
D596       1
D597       1
D598       1
D599       1
D600       1
D601       1
D602       1
D603       1
D604       1
D605       1
D606       1
D607       1
D608       1
D609       1
D610       1
D611       1
D612       1
D613       1
D614       1
D615       1
D616       1
D617       1
D618       1
D619       1
D620       1
D621       1
D622       1
D623       1
D624       1
D625       1
D626       1
D627       1
D628       1
D629       1
D630       1
D631       1
D632       1
D633       1
D634       1
D635       1
D636       1
D637       1
D638       1
D639       1
D640       1
D641       1
D642       1
D643       1
D644       1
D645       1
D646       1
D647       1
D648       1
D649       1
D650       1
D651       1
D652       1
D653       1
D654       1
D655       1
D656       1
D657       1
D658       1
D659       1
D660       1
D661       1
D662       1
D663       1
D664       1
D665       1
D666       1
D667       1
D668       1
D669       1
D670       1
D671       1
D672       1
D673       1
D674       1
D675       1
D676       1
D677       1
D678       1
D679       1
D680       1
D681       1
D682       1
D683       1
D684       1
D685       1
D686       1
D687       1
D688       1
D689       1
D690       1
D691       1
D692       1
D693       1
D694       1
D695       1
D696       1
D697       1
D698       1
D699       1
D700       1
D701       1
D702       1
D703       1
D704       1
D705       1
D706       1
D707       1
D708       1
D709       1
D710       1
D711       1
D712       1
D713       1
D714       1
D715       1
D716       1
D717       1
D718       1
D719       1
D720       1
D721       1
D722       1
D723       1
D724       1
D725       1
D726       1
D727       1
D728       1
D729       1
D730       1
D731       1
D732       1
D733       1
D734       1
D735       1
D736       1
D737       1
D738       1
D739       1
D740       1
D741       1
D742       1
D743       1
D744       1
D745       1
D746       1
D747       1
D748       1
D749       1
D750       1
D751       1
D752       1
D753       1
D754       1
D755       1
D756       1
D757       1
D758       1
D759       1
D760       1
D761       1
D762       1
D763       1
D764       1
D765       1
D766       1
D767       1
D768       1
D769       1
D770       1
D771       1
D772       1
D773       1
D774       1
D775       1
D776       1
D777       1
D778       1
D779       1
D780       1
D781       1
D782       1
D783       1
D784       1
D785       1
D786       1
D787       1
D788       1
D789       1
D790       1
D791       1
D792       1
D793       1
D794       1
D795       1
D796       1
D797       1
D798       1
D799       1
D800       1
D801       1
D802       1
D803       1
D804       1
D805       1
D806       1
D807       1
D808       1
D809       1
D810       1
D811       1
D812       1
D813       1
D814       1
D815       1
D816       1
D817       1
D818       1
D819       1
D820       1
D821       1
D822       1
D823       1
D824       1
D825       1
D826       1
D827       1
D828       1
D829       1
D830       1
D831       1
D832       1
D833       1
D834       1
D835       1
D836       1
D837       1
D838       1
D839       1
D840       1
D841       1
D842       1
D843       1
D844       1
D845       1
D846       1
D847       1
D848       1
D849       1
D850       1
D851       1
D852       1
D853       1
D854       1
D855       1
D856       1
D857       1
D858       1
D859       1
D860       1
D861       1
D862       1
D863       1
D864       1
D865       1
D866       1
D867       1
D868       1
D869       1
D870       1
D871       1
D872       1
D873       1
D874       1
D875       1
D876       1
D877       1
D878       1
D879       1
D880       1
D881       1
D882       1
D883       1
D884       1
D885       1
D886       1
D887       1
D888       1
D889       1
D890       1
D891       1
D892       1
D893       1
D894       1
D895       1
D896       1
D897       1
D898       1
D899       1
D900       1
D901       1
D902       1
D903       1
D904       1
D905       1
D906       1
D907       1
D908       1
D909       1
D910       1
D911       1
D912       1
D913       1
D914       1
D915       1
D916       1
D917       1
D918       1
D919       1
D920       1
D921       1
D922       1
D923       1
D924       1
D925       1
D926       1
D927       1
D928       1
D929       1
D930       1
D931       1
D932       1
D933       1
D934       1
D935       1
D936       1
D937       1
D938       1
D939       1
D940       1
D941       1
D942       1
D943       1
D944       1
D945       1
D946       1
D947       1
D948       1
D949       1
D950       1
D951       1
D952       1
D953       1
D954       1
D955       1
D956       1
D957       1
D958       1
D959       1
D960       1
D961       1
D962       1
D963       1
D964       1
D965       1
D966       1
D967       1
D968       1
D969       1
D970       1
D971       1
D972       1
D973       1
D974       1
D975       1
D976       1
D977       1
D978       1
D979       1
D980       1
D981       1
D982       1
D983       1
D984       1
D985       1
D986       1
D987       1
D988       1
D989       1
D990       1
D991       1
D992       1
D993       1
D994       1
D995       1
D996       1
D997       1
D998       1
D999       1
D1000      1

```

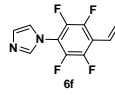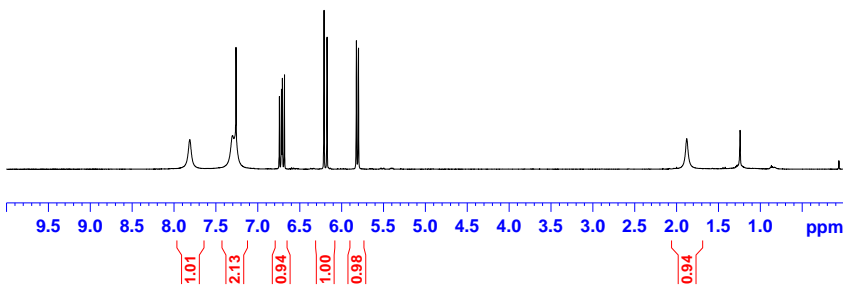

141.9880  
142.0019  
142.0238  
142.0526  
142.0745  
142.0878  
149.9230  
149.9342  
149.9584  
149.9847  
150.0085  
150.0209

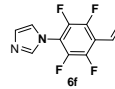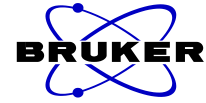

```

NAME      Aug03xf-imi-GPC
EXPNO     2
PROCNO    1
Date_     20160804
Time      5.54
INSTRUM   spect
PROBHD    5 mm PABBO BB-
PULPROG   zgfhigqn.2
TD         131072
SOLVENT   CDCl3
NS         32
DS         4
SWH       89285.711 Hz
FIDRES    0.681196 Hz
AQ        0.7340532 sec
RG         194.02
DW         5.600 usec
DE         6.50 usec
TE         299.0 K
D1         1.00000000 sec
D11        0.03000000 sec
D12        0.00002000 sec
D13        1
D14        1
D15        1
D16        1
D17        1
D18        1
D19        1
D20        1
D21        1
D22        1
D23        1
D24        1
D25        1
D26        1
D27        1
D28        1
D29        1
D30        1
D31        1
D32        1
D33        1
D34        1
D35        1
D36        1
D37        1
D38        1
D39        1
D40        1
D41        1
D42        1
D43        1
D44        1
D45        1
D46        1
D47        1
D48        1
D49        1
D50        1
D51        1
D52        1
D53        1
D54        1
D55        1
D56        1
D57        1
D58        1
D59        1
D60        1
D61        1
D62        1
D63        1
D64        1
D65        1
D66        1
D67        1
D68        1
D69        1
D70        1
D71        1
D72        1
D73        1
D74        1
D75        1
D76        1
D77        1
D78        1
D79        1
D80        1
D81        1
D82        1
D83        1
D84        1
D85        1
D86        1
D87        1
D88        1
D89        1
D90        1
D91        1
D92        1
D93        1
D94        1
D95        1
D96        1
D97        1
D98        1
D99        1
D100       1

```

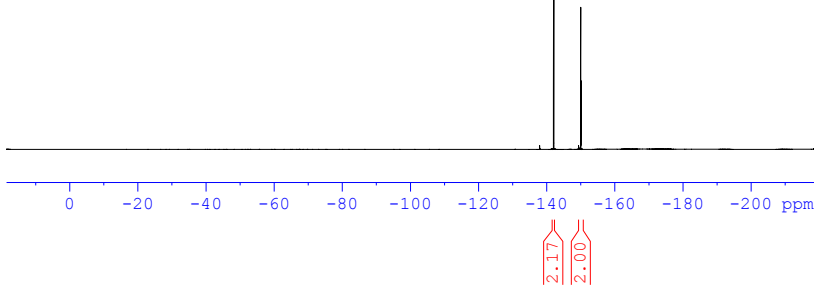

```

===== CHANNEL f1 =====
SF01      376.4607164 MHz
NUC1       13C
P1         13.40 usec
SI         65536
SF         376.4983660 MHz
WDW        EM
SSB        0
LB         0.30 Hz
GB         0
PC         1.00

```

146.0937  
146.0513  
146.0110  
145.9941  
145.9537  
144.1476  
144.1084  
144.0913  
144.0524  
144.0074  
143.9854  
143.9500  
142.2131  
142.1901  
142.1801  
142.1570  
142.0821  
142.0594  
142.0481  
142.0270  
140.2162  
140.1936  
140.1821  
140.1593  
140.0850  
140.0620  
140.0508  
140.0290  
137.6684  
130.0581  
125.0801  
125.0171  
124.9549  
121.5396  
120.0165  
116.4726  
116.3641  
116.2552  
115.5052  
115.4037  
115.2994  
77.2543  
77.0000  
76.7457

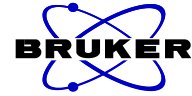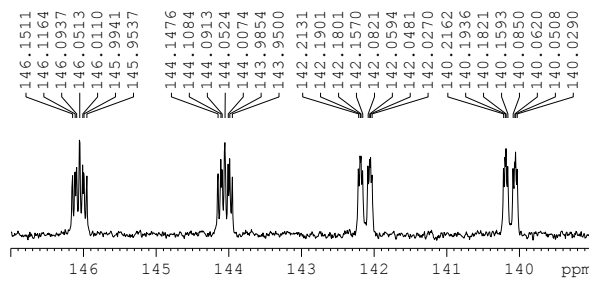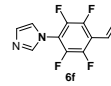

```

NAME      xf0802-Imida-1
EXPNO    2
PROCNO    1
Date_     20160802
Time_     18.20
INSTRUM   spect
PROBHD    5 mm PABBO BB/
PULPROG   zgpg30
TD         65536
SOLVENT   CDCl3
NS         17201
DS         0
SWH        30030.029 Hz
FIDRES     0.458222 Hz
AQ         1.0912410 sec
RG         16384
DW         16.650 usec
DE         6.00 usec
TE         293.3 K
D1         2.00000000 sec
d11        0.03000000 sec
DELTA     1.89999998 sec
TDO        1000

===== CHANNEL f1 =====
NUC1       13C
P1         8.90 usec
PL1        0.00 dB
SFO1       125.7709936 MHz

===== CHANNEL f2 =====
CPDPRG2   waltz16
NUC2       1H
PCPD2     80.00 usec
PL2        0.25 dB
PL12       17.89 dB
PL13       15.83 dB
SFO2       500.1320005 MHz
SI         32768
SF         125.7577925 MHz
WDW        EM
  
```

200 190 180 170 160 150 140 130 120 110 100 90 80 70 60 50 40 30 20 10 0 ppm

7.5714  
7.5671  
7.5617  
7.9835  
7.5598  
7.5536  
7.5472  
7.5345  
7.5300  
7.5252  
7.5210  
7.5071  
7.5048  
7.5012  
7.4951  
7.4878  
7.4842  
7.4777  
7.2600  
6.8650  
6.8352  
6.8199  
6.7901  
6.2536  
6.2085  
5.8137  
5.7838

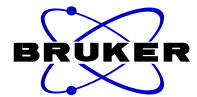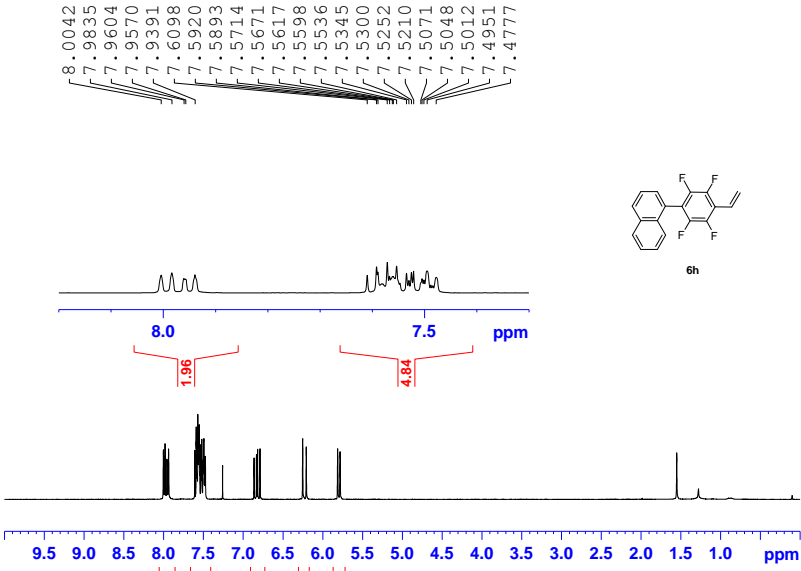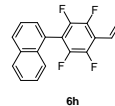

```

NAME      Jul29xf-naph-GCP
EXPNO    1
PROCNO    1
Date_     20160729
Time_     11.57
INSTRUM   spect
PROBHD    5 mm PABBO BB-
PULPROG   zg30
TD         32768
SOLVENT   CDCl3
NS         8
DS         0
SWH        8223.685 Hz
FIDRES     0.250967 Hz
AQ         1.9923444 sec
RG         138.27
DW         60.800 usec
DE         6.50 usec
TE         298.4 K
D1         1.00000000 sec
TDO        1

===== CHANNEL f1 =====
SFO1       400.1324710 MHz
NUC1       1H
P1         13.40 usec
SI         65536
SF         400.1300096 MHz
WDW        EM
SSB        0
LB         0.30 Hz
GB         0
PC         1.00
  
```

9.5 9.0 8.5 8.0 7.5 7.0 6.5 6.0 5.5 5.0 4.5 4.0 3.5 3.0 2.5 2.0 1.5 1.0 ppm





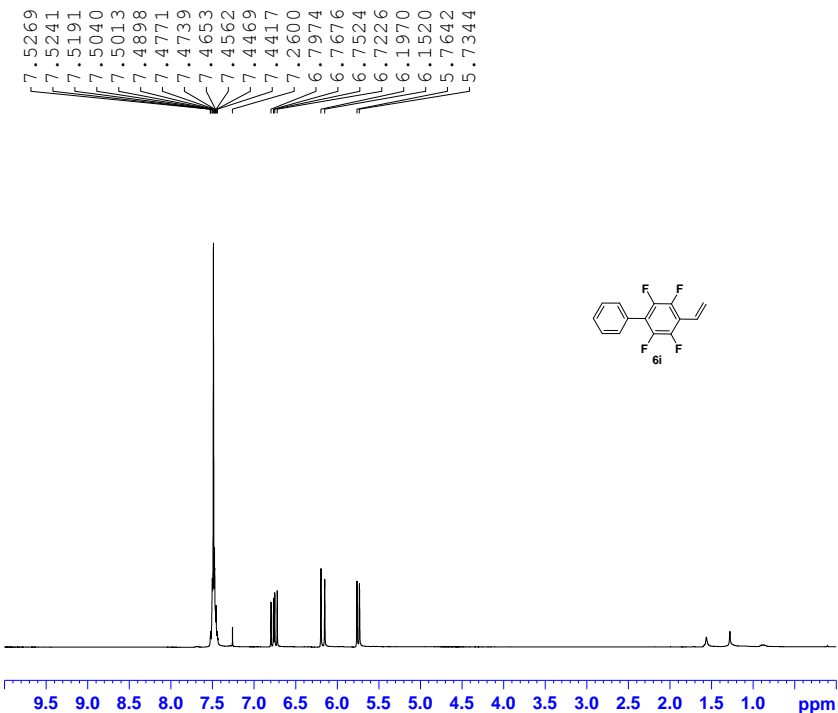

7.5269  
7.5241  
7.5191  
7.5040  
7.5013  
7.4898  
7.4771  
7.4739  
7.4653  
7.4562  
7.4469  
7.4417  
7.2600  
6.7974  
6.7676  
6.7524  
6.7226  
6.1970  
6.1520  
5.7642  
5.7344

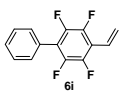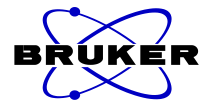

```

NAME      Aug03xf-ph-GPC
EXPNO     1
PROCNO    1
Date_     20160804
Time      5.45
INSTRUM   spect
PROBHD    5 mm PABBO BB-
PULPROG   zg30
TD         32768
SOLVENT   CDC13
NS         8
DS         0
SWH       8223.685 Hz
FIDRES    0.250967 Hz
AQ         1.9923444 sec
RG         95.02
DW         60.800 usec
DE         6.50 usec
TE         298.9 K
D1         1.00000000 sec
TDO        1
  
```

```

===== CHANNEL f1 =====
SF01     400.1324710 MHz
NUC1      1H
P1        13.40 usec
SI        65536
SF        400.1300099 MHz
WDW       EM
SSB       0
LB        0.30 Hz
GB         0
PC         1.00
  
```

9.5 9.0 8.5 8.0 7.5 7.0 6.5 6.0 5.5 5.0 4.5 4.0 3.5 3.0 2.5 2.0 1.5 1.0 ppm

4.85  
0.98  
1.01  
1.06

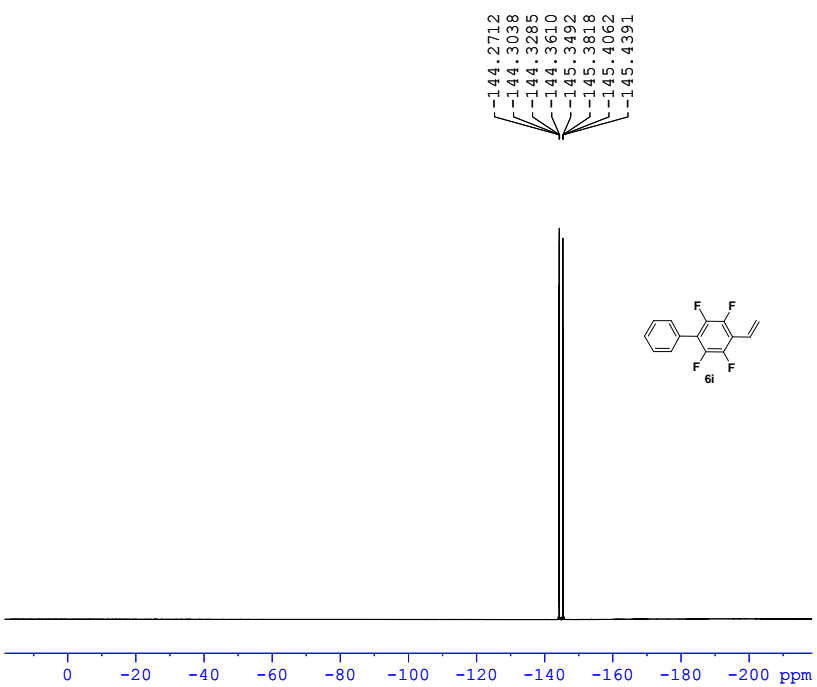

-144.2712  
-144.3038  
-144.3285  
-144.3610  
-145.3492  
-145.3818  
-145.4062  
-145.4391

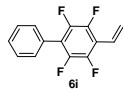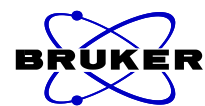

```

NAME      Aug03xf-ph-GPC
EXPNO     2
PROCNO    1
Date_     20160804
Time      5.48
INSTRUM   spect
PROBHD    5 mm PABBO BB-
PULPROG   zgfhigqn.2
TD         131072
SOLVENT   CDC13
NS         32
DS         4
SWH       89285.711 Hz
FIDRES    0.681196 Hz
AQ         0.7340532 sec
RG         194.02
DW         5.600 usec
DE         6.50 usec
TE         299.1 K
D1         1.00000000 sec
D11        0.03000000 sec
D12        0.00002000 sec
TDO        1
  
```

```

===== CHANNEL f1 =====
SF01     376.4607164 MHz
NUC1      13C
P1        13.40 usec
SI        65536
SF        376.4983660 MHz
WDW       EM
SSB       0
LB        0.30 Hz
GB         0
PC         1.00
  
```

0 -20 -40 -60 -80 -100 -120 -140 -160 -180 -200 ppm

2.14  
2.00



140.4298  
140.4424  
140.4713  
140.4928  
140.5213  
140.5330  
142.7214  
142.7331  
142.7619  
142.7835  
142.8122  
142.8236

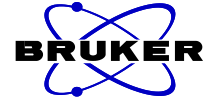

```

NAME      Aug08xf-COOMe-GPC
EXPNO    2
PROCNO   1
Date_    20160808
Time     10.30
INSTRUM  spect
PROBHD   5 mm PABBO BB-
PULPROG  zgfhigqn.2
TD       131072
SOLVENT  CDC13
NS       32
DS       4
SWH      89285.711 Hz
FIDRES   0.681196 Hz
AQ       0.7340532 sec
RG       194.02
DW       5.600 usec
DE       6.50 usec
TE       299.2 K
D1       1.00000000 sec
D11      0.03000000 sec
D12      0.00002000 sec
TD0      1
  
```

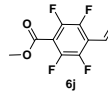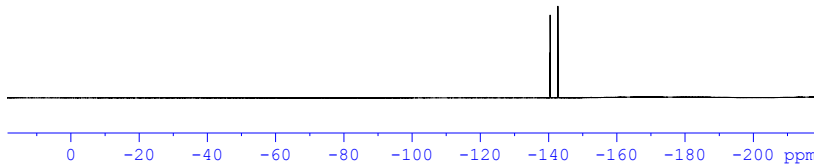

```

===== CHANNEL f1 =====
SFO1    376.4607164 MHz
NUC1    19F
P1      13.40 usec
SI      65536
SF      376.4983660 MHz
WDW     EM
SSB     0
LB      0.30 Hz
GB      0
PC      1.00
  
```

160.2120  
145.8814  
145.8437  
145.8073  
145.7563  
145.7189  
145.6813  
145.6608  
145.6231  
145.5752  
145.5450  
145.5068  
145.4644  
143.8463  
143.8084  
143.7680  
143.7221  
143.6830  
143.6562  
143.6161  
143.5777  
143.5480  
143.4989  
143.4623

143.8  
143.6  
143.4  
143.2 ppm

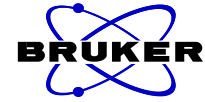

```

NAME      xf0806
EXPNO    1
PROCNO   1
Date_    20160806
Time     21.34
INSTRUM  spect
PROBHD   5 mm PABBO BB/
PULPROG  zgpg30
TD       65536
SOLVENT  CDC13
NS       29870
DS       0
SWH      30030.029 Hz
FIDRES   0.458222 Hz
AQ       1.0912410 sec
RG       16384
DW       16.650 usec
DE       6.00 usec
TE       295.1 K
D1       2.00000000 sec
d11      0.03000000 sec
DELTA    1.89999998 sec
TD0      1
  
```

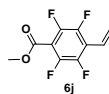

```

===== CHANNEL f1 =====
NUC1    13C
P1      8.90 usec
PL1     0.00 dB
SFO1    125.7709936 MHz

===== CHANNEL f2 =====
CPDPRG2  waltz16
NUC2     1H
PCPD2   80.00 usec
PL2     0.25 dB
PL12    17.89 dB
PL13    15.83 dB
SFO2    500.1320005 MHz
SI      32768
WDW     EM
  
```

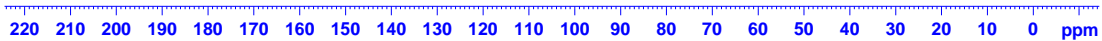

7.4552  
7.4515  
7.4478  
7.4332  
7.4294  
7.4257  
7.4125  
7.4073  
7.3960  
7.3939  
7.3911  
7.3774  
7.3725  
7.1918  
7.1891  
7.1765  
7.1733  
7.1699  
7.1548  
7.1143  
7.1115  
7.1099  
7.1061  
7.1007  
7.0975  
7.0952  
7.0925  
7.0898  
7.0838  
6.7832  
6.7534  
6.7381  
6.7084  
6.1813  
6.1363  
5.7508  
5.7210

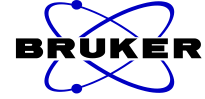

```

NAME      Aug08xf-PhOpH-GPC
EXPNO     1
PROCNO    1
Date_     20160808
Time_     10.24
INSTRUM   spect
PROBHD    5 mm PABBO BB-
PULPROG   zg30
TD         32768
SOLVENT   CDC13
NS         8
DS         0
SWH       8223.685 Hz
FIDRES    0.250967 Hz
AQ        1.9923444 sec
RG         170.8
DW         60.800 usec
DE         6.50 usec
TE         298.9 K
D1         1.00000000 sec
D11        0
D12        0
TDO        1
  
```

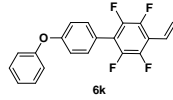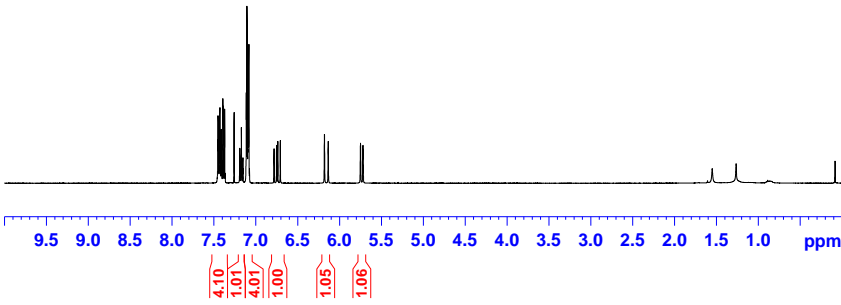

```

===== CHANNEL f1 =====
SF01    400.1324710 MHz
NUC1     1H
P1       13.40 usec
SI       65536
SF       400.1300097 MHz
WDW      EM
SSB      0
LB       0.30 Hz
GB       0
PC       0.50
  
```

-144.2785  
-144.3109  
-144.3359  
-144.3685  
-145.5178  
-145.5493  
-145.5737  
-145.6063

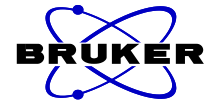

```

NAME      Aug08xf-PhOpH-GPC
EXPNO     2
PROCNO    1
Date_     20160808
Time_     10.26
INSTRUM   spect
PROBHD    5 mm PABBO BB-
PULPROG   zgfhigpn.2
TD         131072
SOLVENT   CDC13
NS         32
DS         4
SWH       89285.711 Hz
FIDRES    0.681196 Hz
AQ        0.7340532 sec
RG         194.02
DW         5.600 usec
DE         6.50 usec
TE         299.2 K
D1         1.00000000 sec
D11        0.03000000 sec
D12        0.00002000 sec
TDO        1
  
```

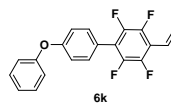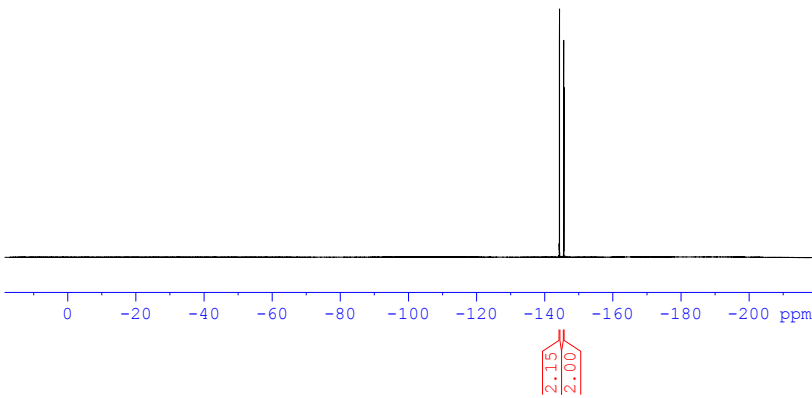

```

===== CHANNEL f1 =====
SF01    376.4607164 MHz
NUC1     13C
P1       13.40 usec
SI       65536
SF       376.4983660 MHz
WDW      EM
SSB      0
LB       0.30 Hz
GB       0
PC       1.00
  
```

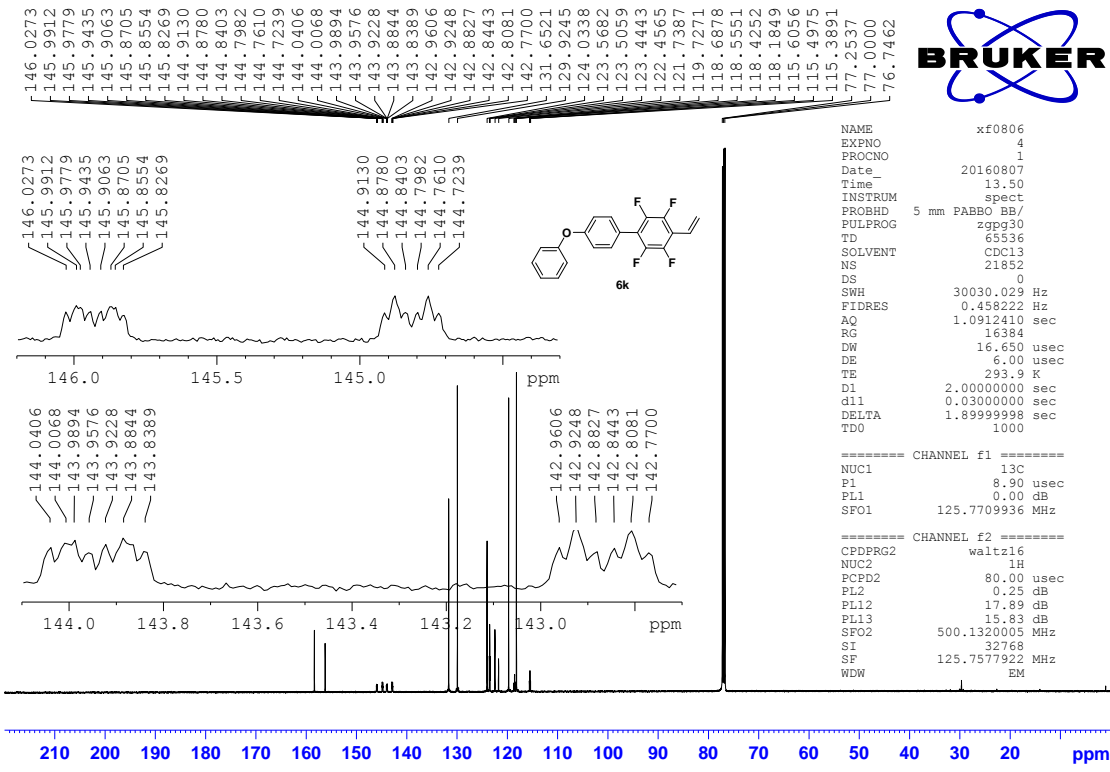

Supplement: c7sc00408g1.pdf [file c7sc00408g1.pdf]
